# Supplementary material for: Ion channel gene expression predicts survival in glioma patients
Source: PubMed Central journal article supplement (PMC4522676; doi:10.1038/srep11593), 2015-08-03
Supplement: srep11593-s1.pdf [file srep11593-s1.pdf]

**Supplementary information of “Ion channel gene  
expression predicts survival in glioma patients”**

Rong Wang  
Christopher I. Gurguis  
Wanjun Gu  
Eun A Ko  
Inja Lim  
Hyoweon Bang  
Tong Zhou  
Jae-Hong Ko\*

March 20, 2015

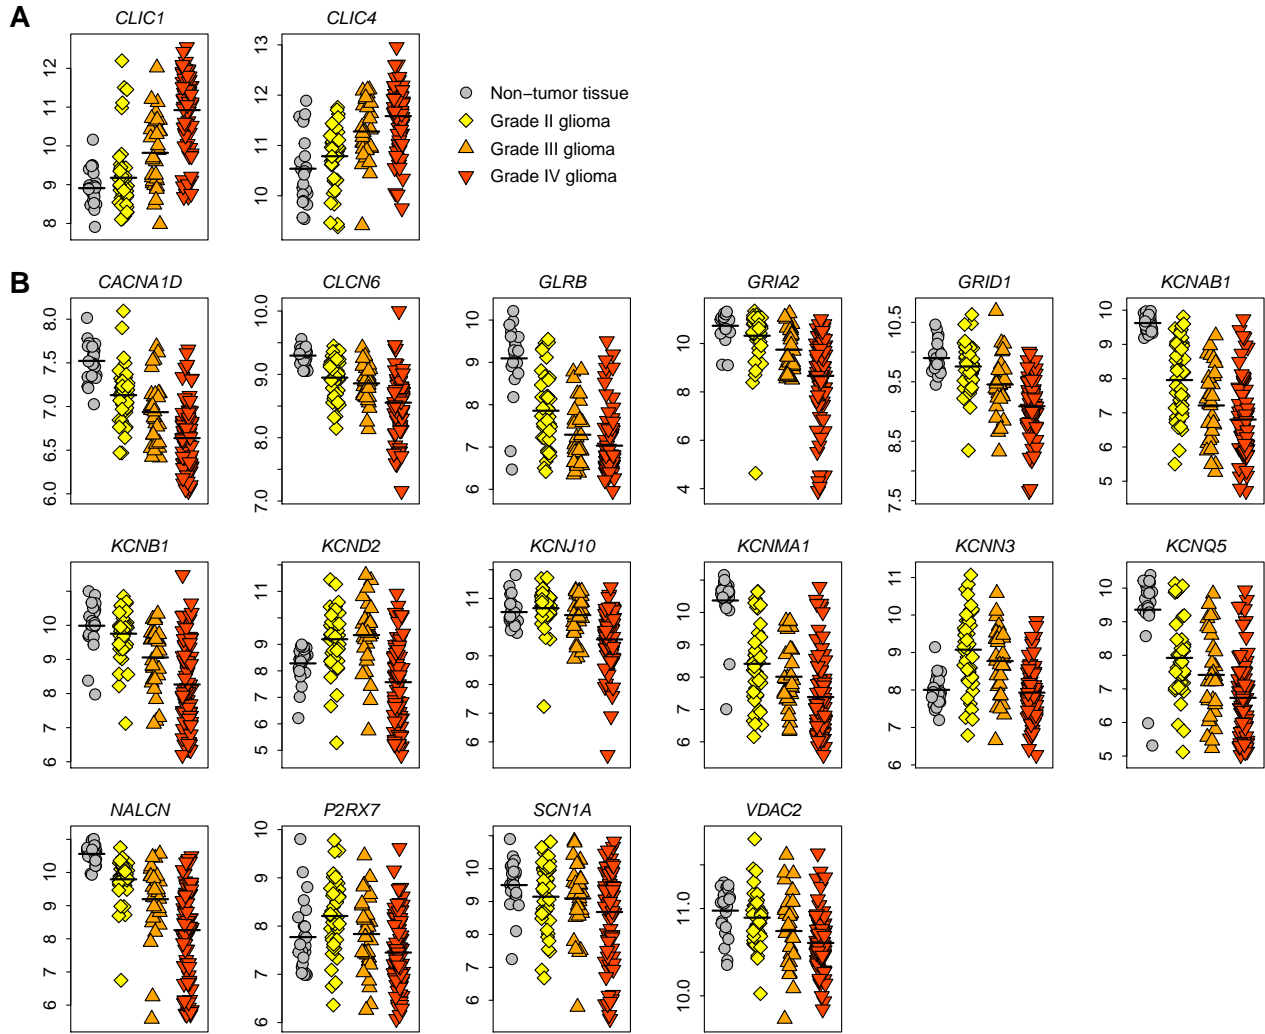

**Supplementary Figure S1. Deregulated ion channel genes in glioma (HFH).** The gene expression data were from the HFH cohort. (A) The two ion channel genes that are up-regulated in high-grade glioma. (B) The 16 ion channel genes that are down-regulated in high-grade glioma. For the gene with multiple probe sets, only the probe set with the most significant  $P$ -value was plotted. The horizontal black line indicates the mean of each category. Y-axis:  $\log_2$ -transformed expression values.

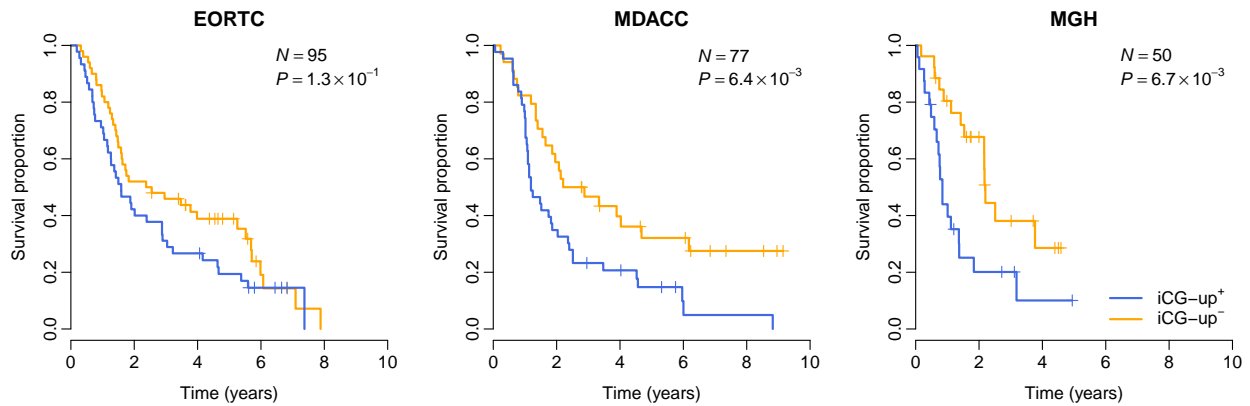

**Supplementary Figure S2. Kaplan-Meier curves for glioma patients in the three validation cohorts (iCG-up).** The expression of iCG-up predicts poor survival in the MDACC and MGH cohorts, but not in the EORTC cohort. The blue curves are for the iCG-up<sup>+</sup> patients while yellow curves are for the iCG-up<sup>-</sup> patients. *P*-values were calculated by log-rank test.

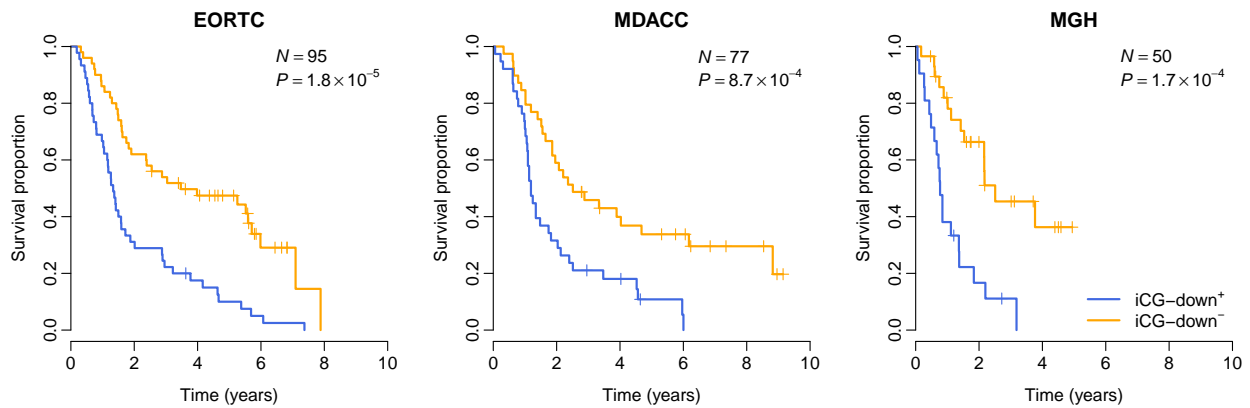

**Supplementary Figure S3. Kaplan-Meier curves for glioma patients in the three validation cohorts (iCG-down).** The expression of iCG-down predicts poor survival in the EORTC, MDACC, and MGH cohorts. The blue curves are for the iCG-down<sup>+</sup> patients while yellow curves are for the iCG-down<sup>-</sup> patients. *P*-values were calculated by log-rank test.

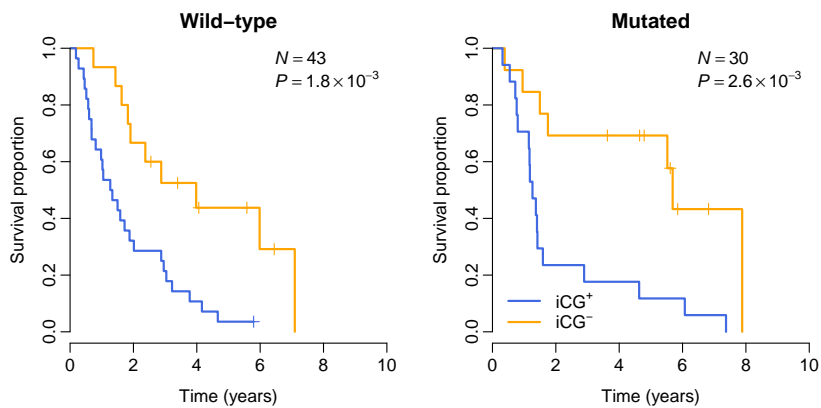

**Supplementary Figure S4. Kaplan-Meier curves for glioma patients grouped by *IDH1* mutation status.** The left panel is for the patients without *IDH1* mutation while the right panel is for the patients with mutated *IDH1*. The expression of iCG predicts poor survival in both the subgroups from the EORTC cohort. The blue curves are for the iCG<sup>+</sup> patients while yellow curves are for the iCG<sup>-</sup> patients. *P*-values were calculated by log-rank test.

**Supplementary Table S1.** Probe sets/ genes that are differentially expressed with glioma grade

| Probeset ID  | Gene symbol    | Gene description                                                          | $\rho$ | Adjusted <i>P</i> -value |
|--------------|----------------|---------------------------------------------------------------------------|--------|--------------------------|
| 205579_at    | <i>HRH1</i>    | histamine receptor H1                                                     | 0.738  | 3.8E-04                  |
| 1555575_a_at | <i>KDELRL1</i> | KDEL (Lys-Asp-Glu-Leu) endoplasmic reticulum protein retention receptor 1 | 0.724  | 4.0E-04                  |
| 227055_at    | <i>METTL7B</i> | methyltransferase like 7B                                                 | 0.720  | 4.3E-04                  |
| 216331_at    | <i>ITGA7</i>   | integrin, alpha 7                                                         | 0.714  | 4.7E-04                  |
| 218257_s_at  | <i>UGGT1</i>   | UDP-glucose glycoprotein glucosyltransferase 1                            | 0.689  | 6.3E-04                  |
| 219118_at    | <i>FKBP11</i>  | FK506 binding protein 11, 19 kDa                                          | 0.677  | 8.0E-04                  |
| 210427_x_at  | <i>ANXA2</i>   | annexin A2                                                                | 0.677  | 8.0E-04                  |
| 222986_s_at  | <i>SHISA5</i>  | shisa homolog 5 ( <i>Xenopus laevis</i> )                                 | 0.673  | 8.7E-04                  |
| 210058_at    | <i>MAPK13</i>  | mitogen-activated protein kinase 13                                       | 0.671  | 8.7E-04                  |
| 202734_at    | <i>TRIP10</i>  | thyroid hormone receptor interactor 10                                    | 0.667  | 8.7E-04                  |
| 37408_at     | <i>MRC2</i>    | mannose receptor, C type 2                                                | 0.666  | 8.8E-04                  |
| 203570_at    | <i>LOXL1</i>   | lysyl oxidase-like 1                                                      | 0.666  | 8.8E-04                  |
| 214315_x_at  | <i>CALR</i>    | calreticulin                                                              | 0.665  | 8.8E-04                  |
| 1558856_at   | <i>DMRTA2</i>  | DMRT-like family A2                                                       | 0.655  | 1.1E-03                  |
| 201590_x_at  | <i>ANXA2</i>   | annexin A2                                                                | 0.654  | 1.1E-03                  |
| 34221_at     | <i>HMGXB3</i>  | HMG box domain containing 3                                               | 0.651  | 1.2E-03                  |
| 63009_at     | <i>SHQ1</i>    | SHQ1 homolog ( <i>S. cerevisiae</i> )                                     | 0.651  | 1.2E-03                  |
| 217733_s_at  | <i>TMSB10</i>  | thymosin beta 10                                                          | 0.648  | 1.2E-03                  |
| 213503_x_at  | <i>ANXA2</i>   | annexin A2                                                                | 0.648  | 1.2E-03                  |
| 208782_at    | <i>FSTL1</i>   | folliculin-like 1                                                         | 0.645  | 1.3E-03                  |
| 216442_x_at  | <i>FNI</i>     | fibronectin 1                                                             | 0.644  | 1.3E-03                  |
| 203820_s_at  | <i>IGF2BP3</i> | insulin-like growth factor 2 mRNA binding protein 3                       | 0.642  | 1.3E-03                  |
| 210495_x_at  | <i>FNI</i>     | fibronectin 1                                                             | 0.640  | 1.4E-03                  |
| 212464_s_at  | <i>FNI</i>     | fibronectin 1                                                             | 0.639  | 1.4E-03                  |
| 213693_s_at  | <i>MUC1</i>    | mucin 1, cell surface associated                                          | 0.639  | 1.4E-03                  |
| 209395_at    | <i>CHI3L1</i>  | chitinase 3-like 1 (cartilage glycoprotein-39)                            | 0.630  | 1.6E-03                  |
| 224859_at    | <i>CD276</i>   | CD276 molecule                                                            | 0.629  | 1.6E-03                  |
| 211719_x_at  | <i>FNI</i>     | fibronectin 1                                                             | 0.628  | 1.7E-03                  |
| 208789_at    | <i>PTRF</i>    | polymerase I and transcript release factor                                | 0.627  | 1.7E-03                  |
| 200770_s_at  | <i>LAMC1</i>   | laminin, gamma 1 (formerly LAMB2)                                         | 0.626  | 1.7E-03                  |
| 226060_at    | <i>RFT1</i>    | RFT1 homolog ( <i>S. cerevisiae</i> )                                     | 0.624  | 1.8E-03                  |
| 227628_at    | <i>GPX8</i>    | glutathione peroxidase 8 (putative)                                       | 0.623  | 1.8E-03                  |
| 218961_s_at  | <i>PNKP</i>    | polynucleotide kinase 3'-phosphatase                                      | 0.623  | 1.8E-03                  |
| 202403_s_at  | <i>COL1A2</i>  | collagen, type I, alpha 2                                                 | 0.623  | 1.8E-03                  |
| 217778_at    | <i>SLC39A1</i> | solute carrier family 39 (zinc transporter), member 1                     | 0.622  | 1.8E-03                  |
| 204517_at    | <i>PPIC</i>    | peptidylprolyl isomerase C (cyclophilin C)                                | 0.620  | 1.9E-03                  |
| 215076_s_at  | <i>COL3A1</i>  | collagen, type III, alpha 1                                               | 0.620  | 1.9E-03                  |
| 228033_at    | <i>E2F7</i>    | E2F transcription factor 7                                                | 0.617  | 2.0E-03                  |
| 209626_s_at  | <i>OSBPL3</i>  | oxysterol binding protein-like 3                                          | 0.616  | 2.1E-03                  |
| 203021_at    | <i>SLPI</i>    | secretory leukocyte peptidase inhibitor                                   | 0.615  | 2.1E-03                  |
| 218795_at    | <i>ACP6</i>    | acid phosphatase 6, lysophosphatidic                                      | 0.615  | 2.1E-03                  |
| 200916_at    | <i>TAGLN2</i>  | transgelin 2                                                              | 0.614  | 2.1E-03                  |
| 220750_s_at  | <i>LEPRE1</i>  | leucine proline-enriched proteoglycan (leprecan) 1                        | 0.613  | 2.2E-03                  |
| 209663_s_at  | <i>ITGA7</i>   | integrin, alpha 7                                                         | 0.613  | 2.2E-03                  |
| 203411_s_at  | <i>LMNA</i>    | lamin A/C                                                                 | 0.612  | 2.2E-03                  |
| 218424_s_at  | <i>STEAP3</i>  | STEAP family member 3, metalloredoxase                                    | 0.612  | 2.2E-03                  |
| 235417_at    | <i>SPOCD1</i>  | SPOC domain containing 1                                                  | 0.609  | 2.3E-03                  |

| Probeset ID  | Gene symbol     | Gene description                                                                                    | $\rho$ | Adjusted P-value |
|--------------|-----------------|-----------------------------------------------------------------------------------------------------|--------|------------------|
| 203764_at    | <i>DLGAP5</i>   | discs, large (Drosophila) homolog-associated protein 5                                              | 0.609  | 2.3E-03          |
| 200791_s_at  | <i>IQGAP1</i>   | IQ motif containing GTPase activating protein 1                                                     | 0.609  | 2.3E-03          |
| 203706_s_at  | <i>FZD7</i>     | frizzled family receptor 7                                                                          | 0.609  | 2.3E-03          |
| 211270_x_at  | <i>PTBP1</i>    | polypyrimidine tract binding protein 1                                                              | 0.609  | 2.3E-03          |
| 241763_s_at  | <i>FBXO32</i>   | F-box protein 32                                                                                    | 0.609  | 2.3E-03          |
| 226722_at    | <i>FAM20C</i>   | family with sequence similarity 20, member C                                                        | 0.608  | 2.3E-03          |
| 229624_at    | <i>OPA3</i>     | optic atrophy 3 (autosomal recessive, with chorea and spastic paraplegia)                           | 0.608  | 2.3E-03          |
| 211161_s_at  | <i>COL3A1</i>   | collagen, type III, alpha 1                                                                         | 0.608  | 2.3E-03          |
| 224911_s_at  | <i>DCBLD2</i>   | discoidin, CUB and LCCL domain containing 2                                                         | 0.608  | 2.3E-03          |
| 201852_x_at  | <i>COL3A1</i>   | collagen, type III, alpha 1                                                                         | 0.606  | 2.4E-03          |
| 225032_at    | <i>FNDC3B</i>   | fibronectin type III domain containing 3B                                                           | 0.606  | 2.4E-03          |
| 202605_at    | <i>GUSB</i>     | glucuronidase, beta                                                                                 | 0.606  | 2.4E-03          |
| 202404_s_at  | <i>COL1A2</i>   | collagen, type I, alpha 2                                                                           | 0.606  | 2.4E-03          |
| 243283_at    | <i>CROT</i>     | carnitine O-octanoyltransferase                                                                     | 0.606  | 2.4E-03          |
| 218959_at    | <i>HOXC10</i>   | homeobox C10                                                                                        | 0.605  | 2.5E-03          |
| 236249_at    | <i>IKBIP</i>    | IKBKB interacting protein                                                                           | 0.602  | 2.6E-03          |
| 207714_s_at  | <i>SERPINH1</i> | serpin peptidase inhibitor, clade H (heat shock protein 47), member 1, (collagen binding protein 1) | 0.601  | 2.7E-03          |
| 45297_at     | <i>EHD2</i>     | EH-domain containing 2                                                                              | 0.600  | 2.7E-03          |
| 203705_s_at  | <i>FZD7</i>     | frizzled family receptor 7                                                                          | 0.600  | 2.7E-03          |
| 200999_s_at  | <i>CKAP4</i>    | cytoskeleton-associated protein 4                                                                   | 0.598  | 2.8E-03          |
| 209396_s_at  | <i>CHI3L1</i>   | chitinase 3-like 1 (cartilage glycoprotein-39)                                                      | 0.597  | 2.8E-03          |
| 208658_at    | <i>PDIA4</i>    | protein disulfide isomerase family A, member 4                                                      | 0.596  | 2.8E-03          |
| 209215_at    | <i>MFSD10</i>   | major facilitator superfamily domain containing 10                                                  | 0.595  | 2.9E-03          |
| 218115_at    | <i>ASF1B</i>    | ASF1 anti-silencing function 1 homolog B ( <i>S. cerevisiae</i> )                                   | 0.595  | 2.9E-03          |
| 213811_x_at  | <i>TCF3</i>     | transcription factor 3 (E2A immunoglobulin enhancer binding factors E12/E47)                        | 0.595  | 2.9E-03          |
| 215199_at    | <i>CALD1</i>    | caldesmon 1                                                                                         | 0.593  | 3.0E-03          |
| 201438_at    | <i>COL6A3</i>   | collagen, type VI, alpha 3                                                                          | 0.592  | 3.0E-03          |
| 218399_s_at  | <i>CDC44</i>    | cell division cycle associated 4                                                                    | 0.592  | 3.0E-03          |
| 202238_s_at  | <i>NNMT</i>     | nicotinamide N-methyltransferase                                                                    | 0.591  | 3.0E-03          |
| 214853_s_at  | <i>SHC1</i>     | SHC (Src homology 2 domain containing) transforming protein 1                                       | 0.591  | 3.1E-03          |
| 203921_at    | <i>CHST2</i>    | carbohydrate (N-acetylglucosamine-6-O) sulfotransferase 2                                           | 0.590  | 3.1E-03          |
| 209156_s_at  | <i>COL6A2</i>   | collagen, type VI, alpha 2                                                                          | 0.590  | 3.1E-03          |
| 202189_x_at  | <i>PTBP1</i>    | polypyrimidine tract binding protein 1                                                              | 0.590  | 3.1E-03          |
| 222206_s_at  | <i>NCLN</i>     | nicalin                                                                                             | 0.587  | 3.3E-03          |
| 236028_at    | <i>IBSP</i>     | integrin-binding sialoprotein                                                                       | 0.587  | 3.3E-03          |
| 202910_s_at  | <i>CD97</i>     | CD97 molecule                                                                                       | 0.587  | 3.3E-03          |
| 206157_at    | <i>PTX3</i>     | pentraxin 3, long                                                                                   | 0.586  | 3.3E-03          |
| 204549_at    | <i>IKBKE</i>    | inhibitor of kappa light polypeptide gene enhancer in B-cells, kinase epsilon                       | 0.585  | 3.4E-03          |
| 218460_at    | <i>HEATR2</i>   | HEAT repeat containing 2                                                                            | 0.584  | 3.5E-03          |
| 203857_s_at  | <i>PDIA5</i>    | protein disulfide isomerase family A, member 5                                                      | 0.583  | 3.6E-03          |
| 1557938_s_at | <i>PTRF</i>     | polymerase I and transcript release factor                                                          | 0.583  | 3.6E-03          |
| 208637_x_at  | <i>ACTN1</i>    | actinin, alpha 1                                                                                    | 0.583  | 3.6E-03          |
| 206201_s_at  | <i>MEOX2</i>    | mesenchyme homeobox 2                                                                               | 0.583  | 3.6E-03          |
| 215867_x_at  | <i>CA12</i>     | carbonic anhydrase XII                                                                              | 0.582  | 3.7E-03          |

| Probeset ID  | Gene symbol     | Gene description                                                          | $\rho$ | Adjusted P-value |
|--------------|-----------------|---------------------------------------------------------------------------|--------|------------------|
| 204306_s_at  | <i>CD151</i>    | CD151 molecule (Raph blood group)                                         | 0.581  | 3.8E-03          |
| 204256_at    | <i>ELOVL6</i>   | ELOVL fatty acid elongase 6                                               | 0.581  | 3.8E-03          |
| 201744_s_at  | <i>LUM</i>      | lumican                                                                   | 0.580  | 3.9E-03          |
| 214164_x_at  | <i>CA12</i>     | carbonic anhydrase XII                                                    | 0.580  | 3.9E-03          |
| 200663_at    | <i>CD63</i>     | CD63 molecule                                                             | 0.579  | 3.9E-03          |
| 203963_at    | <i>CA12</i>     | carbonic anhydrase XII                                                    | 0.579  | 3.9E-03          |
| 203819_s_at  | <i>IGF2BP3</i>  | insulin-like growth factor 2 mRNA binding protein 3                       | 0.578  | 4.0E-03          |
| 223274_at    | <i>TCF19</i>    | transcription factor 19                                                   | 0.578  | 4.1E-03          |
| 228141_at    | <i>GPX8</i>     | glutathione peroxidase 8 (putative)                                       | 0.577  | 4.1E-03          |
| 212109_at    | <i>HN1L</i>     | hematological and neurological expressed 1-like                           | 0.577  | 4.1E-03          |
| 202237_at    | <i>NNMT</i>     | nicotinamide N-methyltransferase                                          | 0.575  | 4.3E-03          |
| 241762_at    | <i>FBXO32</i>   | F-box protein 32                                                          | 0.575  | 4.3E-03          |
| 201664_at    | <i>SMC4</i>     | structural maintenance of chromosomes 4                                   | 0.574  | 4.3E-03          |
| 201749_at    | <i>ECE1</i>     | endothelin converting enzyme 1                                            | 0.574  | 4.3E-03          |
| 219990_at    | <i>E2F8</i>     | E2F transcription factor 8                                                | 0.573  | 4.4E-03          |
| 236285_at    | <i>KLHDC7B</i>  | kelch domain containing 7B                                                | 0.572  | 4.5E-03          |
| 201012_at    | <i>ANXA1</i>    | annexin A1                                                                | 0.572  | 4.5E-03          |
| 227870_at    | <i>IGDCC4</i>   | immunoglobulin superfamily, DCC subclass, member 4                        | 0.572  | 4.5E-03          |
| 218473_s_at  | <i>GLT25D1</i>  | glycosyltransferase 25 domain containing 1                                | 0.571  | 4.5E-03          |
| 203975_s_at  | <i>CHAF1A</i>   | chromatin assembly factor 1, subunit A (p150)                             | 0.570  | 4.6E-03          |
| 225415_at    | <i>DTX3L</i>    | deltex 3-like (Drosophila)                                                | 0.570  | 4.6E-03          |
| 227314_at    | <i>ITGA2</i>    | integrin, alpha 2 (CD49B, alpha 2 subunit of VLA-2 receptor)              | 0.569  | 4.7E-03          |
| 215049_x_at  | <i>CD163</i>    | CD163 molecule                                                            | 0.569  | 4.8E-03          |
| 218542_at    | <i>CEP55</i>    | centrosomal protein 55kDa                                                 | 0.569  | 4.8E-03          |
| 219386_s_at  | <i>SLAMF8</i>   | SLAM family member 8                                                      | 0.569  | 4.8E-03          |
| 210735_s_at  | <i>CA12</i>     | carbonic anhydrase XII                                                    | 0.569  | 4.8E-03          |
| 201324_at    | <i>EMPI1</i>    | epithelial membrane protein 1                                             | 0.568  | 4.8E-03          |
| 204659_s_at  | <i>GFER</i>     | growth factor, augmenter of liver regeneration                            | 0.567  | 4.9E-03          |
| 227239_at    | <i>FAM126A</i>  | family with sequence similarity 126, member A                             | 0.567  | 4.9E-03          |
| 1552309_a_at | <i>NEXN</i>     | nexilin (F actin binding protein)                                         | 0.566  | 5.0E-03          |
| 208688_x_at  | <i>EIF3B</i>    | eukaryotic translation initiation factor 3, subunit B                     | 0.566  | 5.0E-03          |
| 236278_at    | <i>HIST1H3E</i> | Histone cluster 1, H3e                                                    | 0.566  | 5.0E-03          |
| 227877_at    | <i>ANXA2R</i>   | annexin A2 receptor                                                       | 0.565  | 5.0E-03          |
| 204017_at    | <i>KDEL3</i>    | KDEL (Lys-Asp-Glu-Leu) endoplasmic reticulum protein retention receptor 3 | 0.565  | 5.1E-03          |
| 212077_at    | <i>CALD1</i>    | caldesmon 1                                                               | 0.564  | 5.1E-03          |
| 226777_at    | <i>ADAM12</i>   | ADAM metallopeptidase domain 12                                           | 0.564  | 5.1E-03          |
| 203645_s_at  | <i>CD163</i>    | CD163 molecule                                                            | 0.564  | 5.1E-03          |
| 204573_at    | <i>CROT</i>     | carnitine O-octanoyltransferase                                           | 0.563  | 5.2E-03          |
| 222693_at    | <i>FNDC3B</i>   | fibronectin type III domain containing 3B                                 | 0.563  | 5.2E-03          |
| 204150_at    | <i>STAB1</i>    | stabilin 1                                                                | 0.563  | 5.2E-03          |
| 217738_at    | <i>NAMPT</i>    | nicotinamide phosphoribosyltransferase                                    | 0.563  | 5.2E-03          |
| 244710_at    | <i>LRGUK</i>    | leucine-rich repeats and guanylate kinase domain containing               | 0.561  | 5.5E-03          |
| 229802_at    | <i>WISP1</i>    | WNT1 inducible signaling pathway protein 1                                | 0.561  | 5.5E-03          |
| 204508_s_at  | <i>CA12</i>     | carbonic anhydrase XII                                                    | 0.561  | 5.5E-03          |
| 212922_s_at  | <i>SMYD2</i>    | SET and MYND domain containing 2                                          | 0.560  | 5.5E-03          |
| 201105_at    | <i>LGALS1</i>   | lectin, galactoside-binding, soluble, 1                                   | 0.560  | 5.5E-03          |



| Probeset ID  | Gene symbol      | Gene description                                                             | $\rho$ | Adjusted P-value |
|--------------|------------------|------------------------------------------------------------------------------|--------|------------------|
| 218002_s_at  | <i>CXCL14</i>    | chemokine (C-X-C motif) ligand 14                                            | 0.559  | 5.6E-03          |
| 217739_s_at  | <i>NAMPT</i>     | nicotinamide phosphoribosyltransferase                                       | 0.559  | 5.6E-03          |
| 221729_at    | <i>COL5A2</i>    | collagen, type V, alpha 2                                                    | 0.557  | 5.8E-03          |
| 201389_at    | <i>ITGA5</i>     | integrin, alpha 5 (fibronectin receptor, alpha polypeptide)                  | 0.556  | 5.9E-03          |
| 204932_at    | <i>TNFRSF11B</i> | tumor necrosis factor receptor superfamily, member 11b                       | 0.556  | 6.0E-03          |
| 202668_at    | <i>EFNB2</i>     | ephrin-B2                                                                    | 0.555  | 6.1E-03          |
| 213338_at    | <i>TMEM158</i>   | transmembrane protein 158 (gene/pseudogene)                                  | 0.554  | 6.1E-03          |
| 217770_at    | <i>PIGT</i>      | phosphatidylinositol glycan anchor biosynthesis, class T                     | 0.554  | 6.2E-03          |
| 223241_at    | <i>SNX8</i>      | sorting nexin 8                                                              | 0.554  | 6.2E-03          |
| 208074_s_at  | <i>AP2SI</i>     | adaptor-related protein complex 2, sigma 1 subunit                           | 0.553  | 6.3E-03          |
| 218070_s_at  | <i>GMPPA</i>     | GDP-mannose pyrophosphorylase A                                              | 0.553  | 6.3E-03          |
| 218662_s_at  | <i>NCAPG</i>     | non-SMC condensin I complex, subunit G                                       | 0.552  | 6.3E-03          |
| 212792_at    | <i>DPY19L1</i>   | dpy-19-like 1 (C. elegans)                                                   | 0.552  | 6.3E-03          |
| 218802_at    | <i>CCDC109B</i>  | coiled-coil domain containing 109B                                           | 0.552  | 6.4E-03          |
| 1554600_s_at | <i>LMNA</i>      | lamin A/C                                                                    | 0.552  | 6.4E-03          |
| 203282_at    | <i>GBE1</i>      | glucan (1,4-alpha-), branching enzyme 1                                      | 0.552  | 6.4E-03          |
| 222692_s_at  | <i>FNDC3B</i>    | fibronectin type III domain containing 3B                                    | 0.551  | 6.5E-03          |
| 222411_s_at  | <i>SSR3</i>      | signal sequence receptor, gamma (translocon-associated protein gamma)        | 0.550  | 6.5E-03          |
| 211964_at    | <i>COL4A2</i>    | collagen, type IV, alpha 2                                                   | 0.550  | 6.6E-03          |
| 204646_at    | <i>DPYD</i>      | dihydropyrimidine dehydrogenase                                              | 0.549  | 6.6E-03          |
| 221999_at    | <i>VRK3</i>      | vaccinia related kinase 3                                                    | 0.549  | 6.6E-03          |
| 218833_at    | <i>ZAK</i>       | sterile alpha motif and leucine zipper containing kinase AZK                 | 0.549  | 6.7E-03          |
| 227998_at    | <i>S100A16</i>   | S100 calcium binding protein A16                                             | 0.549  | 6.7E-03          |
| 243750_x_at  | <i>FAM207A</i>   | family with sequence similarity 207, member A                                | 0.549  | 6.7E-03          |
| 225803_at    | <i>FBXO32</i>    | F-box protein 32                                                             | 0.548  | 6.7E-03          |
| 226032_at    | <i>CASP2</i>     | caspase 2, apoptosis-related cysteine peptidase                              | 0.548  | 6.7E-03          |
| 200839_s_at  | <i>CTSB</i>      | cathepsin B                                                                  | 0.548  | 6.8E-03          |
| 223363_at    | <i>PSMG3</i>     | proteasome (prosome, macropain) assembly chaperone 3                         | 0.548  | 6.8E-03          |
| 229400_at    | <i>HOXD10</i>    | homeobox D10                                                                 | 0.548  | 6.8E-03          |
| 219278_at    | <i>MAP3K6</i>    | mitogen-activated protein kinase kinase kinase 6                             | 0.547  | 6.9E-03          |
| 224715_at    | <i>WDR34</i>     | WD repeat domain 34                                                          | 0.547  | 6.9E-03          |
| 202718_at    | <i>IGFBP2</i>    | insulin-like growth factor binding protein 2, 36kDa                          | 0.546  | 7.0E-03          |
| 210978_s_at  | <i>TAGLN2</i>    | transgelin 2                                                                 | 0.546  | 7.0E-03          |
| 212082_s_at  | <i>MYL6</i>      | myosin, light chain 6, alkali, smooth muscle and non-muscle                  | 0.546  | 7.0E-03          |
| 208636_at    | <i>ACTN1</i>     | actinin, alpha 1                                                             | 0.546  | 7.0E-03          |
| 225636_at    | <i>STAT2</i>     | signal transducer and activator of transcription 2, 113kDa                   | 0.545  | 7.1E-03          |
| 210776_x_at  | <i>TCF3</i>      | transcription factor 3 (E2A immunoglobulin enhancer binding factors E12/E47) | 0.545  | 7.1E-03          |
| 200757_s_at  | <i>CALU</i>      | calumenin                                                                    | 0.545  | 7.1E-03          |
| 218066_at    | <i>SLC12A7</i>   | solute carrier family 12 (potassium/chloride transporters), member 7         | 0.545  | 7.1E-03          |
| 211047_x_at  | <i>AP2SI</i>     | adaptor-related protein complex 2, sigma 1 subunit                           | 0.545  | 7.1E-03          |
| 229538_s_at  | <i>IQGAP3</i>    | IQ motif containing GTPase activating protein 3                              | 0.544  | 7.2E-03          |
| 224511_s_at  | <i>TXNDC17</i>   | thioredoxin domain containing 17                                             | 0.543  | 7.3E-03          |
| 228069_at    | <i>FAM54A</i>    | family with sequence similarity 54, member A                                 | 0.543  | 7.3E-03          |
| 226282_at    | <i>PTPN14</i>    | protein tyrosine phosphatase, non-receptor type 14                           | 0.543  | 7.4E-03          |

| Probeset ID | Gene symbol    | Gene description                                                    | $\rho$ | Adjusted P-value |
|-------------|----------------|---------------------------------------------------------------------|--------|------------------|
| 209124_at   | <i>MYD88</i>   | myeloid differentiation primary response gene (88)                  | 0.541  | 7.6E-03          |
| 201817_at   | <i>UBE3C</i>   | ubiquitin protein ligase E3C                                        | 0.541  | 7.7E-03          |
| 218880_at   | <i>FOSL2</i>   | FOS-like antigen 2                                                  | 0.540  | 7.7E-03          |
| 215706_x_at | <i>ZYX</i>     | zyxin                                                               | 0.540  | 7.7E-03          |
| 227807_at   | <i>PARP9</i>   | poly (ADP-ribose) polymerase family, member 9                       | 0.540  | 7.7E-03          |
| 209263_x_at | <i>TSPAN4</i>  | tetraspanin 4                                                       | 0.539  | 7.8E-03          |
| 202952_s_at | <i>ADAM12</i>  | ADAM metallopeptidase domain 12                                     | 0.539  | 7.8E-03          |
| 225321_s_at | <i>PILRB</i>   | paired immunoglobulin-like type 2 receptor beta                     | 0.539  | 7.8E-03          |
| 204083_s_at | <i>TPM2</i>    | tropomyosin 2 (beta)                                                | 0.539  | 7.8E-03          |
| 200629_at   | <i>WARS</i>    | tryptophanyl-tRNA synthetase                                        | 0.538  | 8.0E-03          |
| 230022_at   | <i>CLEC18A</i> | C-type lectin domain family 18, member A                            | 0.538  | 8.0E-03          |
| 204451_at   | <i>FZD1</i>    | frizzled family receptor 1                                          | 0.538  | 8.0E-03          |
| 204352_at   | <i>TRAF5</i>   | TNF receptor-associated factor 5                                    | 0.538  | 8.0E-03          |
| 212988_x_at | <i>ACTG1</i>   | actin, gamma 1                                                      | 0.538  | 8.0E-03          |
| 209773_s_at | <i>RRM2</i>    | ribonucleotide reductase M2                                         | 0.538  | 8.0E-03          |
| 218950_at   | <i>ARAP3</i>   | ArfGAP with RhoGAP domain, ankyrin repeat and PH domain 3           | 0.538  | 8.0E-03          |
| 202596_at   | <i>ENSA</i>    | endosulfine alpha                                                   | 0.538  | 8.0E-03          |
| 230036_at   | <i>SAMD9L</i>  | sterile alpha motif domain containing 9-like                        | 0.537  | 8.0E-03          |
| 205909_at   | <i>POLE2</i>   | polymerase (DNA directed), epsilon 2, accessory subunit             | 0.537  | 8.0E-03          |
| 203186_s_at | <i>S100A4</i>  | S100 calcium binding protein A4                                     | 0.537  | 8.0E-03          |
| 208790_s_at | <i>PTRF</i>    | polymerase I and transcript release factor                          | 0.537  | 8.1E-03          |
| 222866_s_at | <i>FLVCR2</i>  | feline leukemia virus subgroup C cellular receptor family, member 2 | 0.537  | 8.1E-03          |
| 222046_at   | <i>SRRT</i>    | serrate RNA effector molecule homolog (Arabidopsis)                 | 0.536  | 8.2E-03          |
| 205265_s_at | <i>SPEG</i>    | SPEG complex locus                                                  | 0.536  | 8.2E-03          |
| 201941_at   | <i>CPD</i>     | carboxypeptidase D                                                  | 0.536  | 8.3E-03          |
| 221730_at   | <i>COL5A2</i>  | collagen, type V, alpha 2                                           | 0.535  | 8.3E-03          |
| 241812_at   | <i>SPATS2L</i> | spermatogenesis associated, serine-rich 2-like                      | 0.535  | 8.3E-03          |
| 211126_s_at | <i>CSRP2</i>   | cysteine and glycine-rich protein 2                                 | 0.534  | 8.6E-03          |
| 210220_at   | <i>FZD2</i>    | frizzled family receptor 2                                          | 0.534  | 8.6E-03          |
| 202381_at   | <i>ADAM9</i>   | ADAM metallopeptidase domain 9                                      | 0.534  | 8.6E-03          |
| 211980_at   | <i>COL4A1</i>  | collagen, type IV, alpha 1                                          | 0.533  | 8.6E-03          |
| 202095_s_at | <i>BIRC5</i>   | baculoviral IAP repeat containing 5                                 | 0.533  | 8.6E-03          |
| 209651_at   | <i>TGFB1I1</i> | transforming growth factor beta 1 induced transcript 1              | 0.533  | 8.7E-03          |
| 226603_at   | <i>SAMD9L</i>  | sterile alpha motif domain containing 9-like                        | 0.533  | 8.7E-03          |
| 38487_at    | <i>STAB1</i>   | stabilin 1                                                          | 0.533  | 8.7E-03          |
| 203968_s_at | <i>CDC6</i>    | cell division cycle 6 homolog (S. cerevisiae)                       | 0.533  | 8.7E-03          |
| 203484_at   | <i>SEC61G</i>  | Sec61 gamma subunit                                                 | 0.532  | 8.9E-03          |
| 210609_s_at | <i>TP53I3</i>  | tumor protein p53 inducible protein 3                               | 0.531  | 8.9E-03          |
| 217899_at   | <i>TMEM214</i> | transmembrane protein 214                                           | 0.531  | 8.9E-03          |
| 203729_at   | <i>EMP3</i>    | epithelial membrane protein 3                                       | 0.531  | 8.9E-03          |
| 215198_s_at | <i>CALD1</i>   | caldesmon 1                                                         | 0.531  | 8.9E-03          |
| 206026_s_at | <i>TNFAIP6</i> | tumor necrosis factor, alpha-induced protein 6                      | 0.530  | 9.2E-03          |
| 200771_at   | <i>LAMC1</i>   | laminin, gamma 1 (formerly LAMB2)                                   | 0.529  | 9.4E-03          |
| 207847_s_at | <i>MUC1</i>    | mucin 1, cell surface associated                                    | 0.528  | 9.5E-03          |
| 218728_s_at | <i>CNIH4</i>   | cornichon homolog 4 (Drosophila)                                    | 0.528  | 9.5E-03          |
| 212115_at   | <i>HN1L</i>    | hematological and neurological expressed 1-like                     | 0.528  | 9.6E-03          |
| 229304_s_at | <i>MLF1IP</i>  | MLF1 interacting protein                                            | 0.526  | 9.8E-03          |

| Probeset ID | Gene symbol     | Gene description                                                                      | $\rho$ | Adjusted<br><i>P</i> -value |
|-------------|-----------------|---------------------------------------------------------------------------------------|--------|-----------------------------|
| 223077_at   | <i>TMOD3</i>    | tropomodulin 3 (ubiquitous)                                                           | 0.526  | 9.8E-03                     |
| 210840_s_at | <i>IQGAP1</i>   | IQ motif containing GTPase activating protein 1                                       | 0.526  | 9.9E-03                     |
| 223690_at   | <i>LTBP2</i>    | latent transforming growth factor beta binding protein 2                              | 0.526  | 9.9E-03                     |
| 206025_s_at | <i>TNFAIP6</i>  | tumor necrosis factor, alpha-induced protein 6                                        | 0.525  | 1.0E-02                     |
| 200808_s_at | <i>ZYX</i>      | zyxin                                                                                 | 0.525  | 1.0E-02                     |
| 204908_s_at | <i>BCL3</i>     | B-cell CLL/lymphoma 3                                                                 | 0.523  | 1.0E-02                     |
| 223419_at   | <i>FBXW9</i>    | F-box and WD repeat domain containing 9                                               | 0.523  | 1.0E-02                     |
| 244427_at   | <i>KIF23</i>    | Kinesin family member 23                                                              | 0.523  | 1.0E-02                     |
| 202389_s_at | <i>HTT</i>      | huntingtin                                                                            | 0.523  | 1.1E-02                     |
| 217867_x_at | <i>BACE2</i>    | beta-site APP-cleaving enzyme 2                                                       | 0.522  | 1.1E-02                     |
| 1553983_at  | <i>DTYMK</i>    | deoxythymidylate kinase (thymidylate kinase)                                          | 0.522  | 1.1E-02                     |
| 208161_s_at | <i>ABCC3</i>    | ATP-binding cassette, sub-family C (CFTR/MRP), member 3                               | 0.522  | 1.1E-02                     |
| 202185_at   | <i>PLOD3</i>    | procollagen-lysine, 2-oxoglutarate 5-dioxygenase 3                                    | 0.521  | 1.1E-02                     |
| 202107_s_at | <i>MCM2</i>     | minichromosome maintenance complex component 2                                        | 0.521  | 1.1E-02                     |
| 225328_at   | <i>FBXO32</i>   | F-box protein 32                                                                      | 0.521  | 1.1E-02                     |
| 207165_at   | <i>HMMR</i>     | hyaluronan-mediated motility receptor (RHAMM)                                         | 0.520  | 1.1E-02                     |
| 225285_at   | <i>BCAT1</i>    | branched chain amino-acid transaminase 1, cytosolic                                   | 0.520  | 1.1E-02                     |
| 209627_s_at | <i>OSBPL3</i>   | oxysterol binding protein-like 3                                                      | 0.520  | 1.1E-02                     |
| 210001_s_at | <i>SOCS1</i>    | suppressor of cytokine signaling 1                                                    | 0.520  | 1.1E-02                     |
| 213730_x_at | <i>TCF3</i>     | transcription factor 3 (E2A immunoglobulin enhancer binding factors E12/E47)          | 0.520  | 1.1E-02                     |
| 221587_s_at | <i>C19orf24</i> | chromosome 19 open reading frame 24                                                   | 0.519  | 1.1E-02                     |
| 223361_at   | <i>ABRA1</i>    | ABRA C-terminal like                                                                  | 0.519  | 1.1E-02                     |
| 205266_at   | <i>LIF</i>      | leukemia inhibitory factor                                                            | 0.519  | 1.1E-02                     |
| 38158_at    | <i>ESPL1</i>    | extra spindle pole bodies homolog 1 ( <i>S. cerevisiae</i> )                          | 0.519  | 1.1E-02                     |
| 200755_s_at | <i>CALU</i>     | calumenin                                                                             | 0.519  | 1.1E-02                     |
| 221710_x_at | <i>FAM176B</i>  | family with sequence similarity 176, member B                                         | 0.519  | 1.1E-02                     |
| 201505_at   | <i>LAMB1</i>    | laminin, beta 1                                                                       | 0.519  | 1.1E-02                     |
| 219923_at   | <i>TRIM45</i>   | tripartite motif containing 45                                                        | 0.518  | 1.1E-02                     |
| 212212_s_at | <i>INTS1</i>    | integrator complex subunit 1                                                          | 0.518  | 1.1E-02                     |
| 206364_at   | <i>KIF14</i>    | kinesin family member 14                                                              | 0.518  | 1.1E-02                     |
| 212971_at   | <i>CARS</i>     | cysteinyl-tRNA synthetase                                                             | 0.518  | 1.1E-02                     |
| 217967_s_at | <i>FAM129A</i>  | family with sequence similarity 129, member A                                         | 0.518  | 1.1E-02                     |
| 41660_at    | <i>CELSR1</i>   | cadherin, EGF LAG seven-pass G-type receptor 1 (flamingo homolog, <i>Drosophila</i> ) | 0.518  | 1.1E-02                     |
| 211271_x_at | <i>PTBP1</i>    | polypyrimidine tract binding protein 1                                                | 0.517  | 1.2E-02                     |
| 202503_s_at | <i>KIAA0101</i> | KIAA0101                                                                              | 0.517  | 1.2E-02                     |
| 226103_at   | <i>NEXN</i>     | nexilin (F actin binding protein)                                                     | 0.517  | 1.2E-02                     |
| 222871_at   | <i>KLHDC8A</i>  | kelch domain containing 8A                                                            | 0.517  | 1.2E-02                     |
| 204682_at   | <i>LTBP2</i>    | latent transforming growth factor beta binding protein 2                              | 0.516  | 1.2E-02                     |
| 207030_s_at | <i>CSRP2</i>    | cysteine and glycine-rich protein 2                                                   | 0.516  | 1.2E-02                     |
| 55583_at    | <i>DOCK6</i>    | dedicator of cytokinesis 6                                                            | 0.516  | 1.2E-02                     |
| 226416_at   | <i>ERII</i>     | exoribonuclease 1                                                                     | 0.515  | 1.2E-02                     |
| 204608_at   | <i>ASL</i>      | argininosuccinate lyase                                                               | 0.515  | 1.2E-02                     |
| 202175_at   | <i>CHPF</i>     | chondroitin polymerizing factor                                                       | 0.515  | 1.2E-02                     |
| 215438_x_at | <i>GSPT1</i>    | G1 to S phase transition 1                                                            | 0.515  | 1.2E-02                     |
| 201325_s_at | <i>EMPI1</i>    | epithelial membrane protein 1                                                         | 0.515  | 1.2E-02                     |
| 226113_at   | <i>ZNF436</i>   | zinc finger protein 436                                                               | 0.515  | 1.2E-02                     |

| Probeset ID  | Gene symbol    | Gene description                                                     | $\rho$ | Adjusted P-value |
|--------------|----------------|----------------------------------------------------------------------|--------|------------------|
| 222581_at    | <i>XPR1</i>    | xenotropic and polytropic retrovirus receptor 1                      | 0.514  | 1.2E-02          |
| 223376_s_at  | <i>BRI3</i>    | brain protein I3                                                     | 0.514  | 1.2E-02          |
| 200660_at    | <i>SI00A11</i> | S100 calcium binding protein A11                                     | 0.514  | 1.2E-02          |
| 38703_at     | <i>DNPEP</i>   | aspartyl aminopeptidase                                              | 0.513  | 1.2E-02          |
| 205339_at    | <i>STIL</i>    | SCL/TAL1 interrupting locus                                          | 0.513  | 1.3E-02          |
| 208079_s_at  | <i>AURKA</i>   | aurora kinase A                                                      | 0.513  | 1.3E-02          |
| 211966_at    | <i>COL4A2</i>  | collagen, type IV, alpha 2                                           | 0.512  | 1.3E-02          |
| 229350_x_at  | <i>PARP10</i>  | poly (ADP-ribose) polymerase family, member 10                       | 0.512  | 1.3E-02          |
| 218585_s_at  | <i>DTL</i>     | denticleless E3 ubiquitin protein ligase homolog (Drosophila)        | 0.512  | 1.3E-02          |
| 222484_s_at  | <i>CXCL14</i>  | chemokine (C-X-C motif) ligand 14                                    | 0.512  | 1.3E-02          |
| 206858_s_at  | <i>HOXC6</i>   | homeobox C6                                                          | 0.512  | 1.3E-02          |
| 225867_at    | <i>VASN</i>    | vasorin                                                              | 0.511  | 1.3E-02          |
| 225806_at    | <i>AJUBA</i>   | ajuba LIM protein                                                    | 0.510  | 1.3E-02          |
| 202430_s_at  | <i>PLSCR1</i>  | phospholipid scramblase 1                                            | 0.510  | 1.3E-02          |
| 202755_s_at  | <i>GPC1</i>    | glypican 1                                                           | 0.510  | 1.3E-02          |
| 203201_at    | <i>PMM2</i>    | phosphomannomutase 2                                                 | 0.510  | 1.3E-02          |
| 204844_at    | <i>ENPEP</i>   | glutamyl aminopeptidase (aminopeptidase A)                           | 0.510  | 1.3E-02          |
| 226661_at    | <i>CDCA2</i>   | cell division cycle associated 2                                     | 0.509  | 1.3E-02          |
| 229247_at    | <i>FBLN7</i>   | fibulin 7                                                            | 0.509  | 1.3E-02          |
| 205539_at    | <i>AVIL</i>    | advillin                                                             | 0.509  | 1.3E-02          |
| 219493_at    | <i>SHCBP1</i>  | SHC SH2-domain binding protein 1                                     | 0.509  | 1.3E-02          |
| 205059_s_at  | <i>IDUA</i>    | iduronidase, alpha-L-                                                | 0.509  | 1.3E-02          |
| 206688_s_at  | <i>CPSF4</i>   | cleavage and polyadenylation specific factor 4, 30kDa                | 0.509  | 1.3E-02          |
| 202276_at    | <i>SHFM1</i>   | split hand/foot malformation (ectrodactyly) type 1                   | 0.509  | 1.3E-02          |
| 213214_x_at  | <i>ACTG1</i>   | actin, gamma 1                                                       | 0.509  | 1.3E-02          |
| 223993_s_at  | <i>CNIH4</i>   | cornichon homolog 4 (Drosophila)                                     | 0.509  | 1.3E-02          |
| 205199_at    | <i>CA9</i>     | carbonic anhydrase IX                                                | 0.508  | 1.3E-02          |
| 226552_at    | <i>IER5L</i>   | immediate early response 5-like                                      | 0.508  | 1.4E-02          |
| 1568634_a_at | <i>LRRRC66</i> | leucine rich repeat containing 66                                    | 0.508  | 1.4E-02          |
| 200826_at    | <i>SNRPD2</i>  | small nuclear ribonucleoprotein D2 polypeptide 16.5kDa               | 0.508  | 1.4E-02          |
| 226517_at    | <i>BCAT1</i>   | branched chain amino-acid transaminase 1, cytosolic                  | 0.507  | 1.4E-02          |
| 1558508_a_at | <i>C1orf53</i> | chromosome 1 open reading frame 53                                   | 0.507  | 1.4E-02          |
| 224374_s_at  | <i>EMILIN2</i> | elastin microfibril interfacier 2                                    | 0.506  | 1.4E-02          |
| 226296_s_at  | <i>MRPS15</i>  | mitochondrial ribosomal protein S15                                  | 0.506  | 1.4E-02          |
| 222446_s_at  | <i>BACE2</i>   | beta-site APP-cleaving enzyme 2                                      | 0.506  | 1.4E-02          |
| 221708_s_at  | <i>UNC45A</i>  | unc-45 homolog A (C. elegans)                                        | 0.506  | 1.4E-02          |
| 204702_s_at  | <i>NFE2L3</i>  | nuclear factor (erythroid-derived 2)-like 3                          | 0.506  | 1.4E-02          |
| 222047_s_at  | <i>SRRT</i>    | serrate RNA effector molecule homolog (Arabidopsis)                  | 0.506  | 1.4E-02          |
| 227325_at    | <i>PRR24</i>   | proline rich 24                                                      | 0.505  | 1.4E-02          |
| 221024_s_at  | <i>SLC2A10</i> | solute carrier family 2 (facilitated glucose transporter), member 10 | 0.505  | 1.4E-02          |
| 218305_at    | <i>IPO4</i>    | importin 4                                                           | 0.505  | 1.4E-02          |
| 213373_s_at  | <i>CASP8</i>   | caspase 8, apoptosis-related cysteine peptidase                      | 0.505  | 1.4E-02          |
| 213428_s_at  | <i>COL6A1</i>  | collagen, type VI, alpha 1                                           | 0.504  | 1.5E-02          |
| 201920_at    | <i>SLC20A1</i> | solute carrier family 20 (phosphate transporter), member 1           | 0.504  | 1.5E-02          |
| 207157_s_at  | <i>GNG5</i>    | guanine nucleotide binding protein (G protein), gamma 5              | 0.504  | 1.5E-02          |
| 213226_at    | <i>CCNA2</i>   | cyclin A2                                                            | 0.503  | 1.5E-02          |

| Probeset ID  | Gene symbol     | Gene description                                                                              | $\rho$ | Adjusted P-value |
|--------------|-----------------|-----------------------------------------------------------------------------------------------|--------|------------------|
| 202733_at    | <i>P4HA2</i>    | prolyl 4-hydroxylase, alpha polypeptide II                                                    | 0.503  | 1.5E-02          |
| 55093_at     | <i>CHPF2</i>    | chondroitin polymerizing factor 2                                                             | 0.503  | 1.5E-02          |
| 212235_at    | <i>PLXND1</i>   | plexin D1                                                                                     | 0.503  | 1.5E-02          |
| 244533_at    | <i>PTPN14</i>   | protein tyrosine phosphatase, non-receptor type 14                                            | 0.503  | 1.5E-02          |
| 235545_at    | <i>DEPDC1</i>   | DEP domain containing 1                                                                       | 0.503  | 1.5E-02          |
| 201943_s_at  | <i>CPD</i>      | carboxypeptidase D                                                                            | 0.503  | 1.5E-02          |
| 219025_at    | <i>CD248</i>    | CD248 molecule, endosialin                                                                    | 0.503  | 1.5E-02          |
| 204483_at    | <i>ENO3</i>     | enolase 3 (beta, muscle)                                                                      | 0.502  | 1.5E-02          |
| 1559946_s_at | <i>RUVBL2</i>   | RuvB-like 2 (E. coli)                                                                         | 0.502  | 1.5E-02          |
| 209714_s_at  | <i>CDKN3</i>    | cyclin-dependent kinase inhibitor 3                                                           | 0.502  | 1.5E-02          |
| 223923_at    | <i>C21orf62</i> | chromosome 21 open reading frame 62                                                           | 0.502  | 1.5E-02          |
| 211250_s_at  | <i>SH3BP2</i>   | SH3-domain binding protein 2                                                                  | 0.502  | 1.5E-02          |
| 209803_s_at  | <i>PHLDA2</i>   | pleckstrin homology-like domain, family A, member 2                                           | 0.502  | 1.5E-02          |
| 224699_s_at  | <i>ESYT2</i>    | extended synaptotagmin-like protein 2                                                         | 0.502  | 1.5E-02          |
| 228776_at    | <i>GJC1</i>     | gap junction protein, gamma 1, 45kDa                                                          | 0.502  | 1.5E-02          |
| 230147_at    | <i>F2RL2</i>    | coagulation factor II (thrombin) receptor-like 2                                              | 0.502  | 1.5E-02          |
| 231876_at    | <i>TRIM56</i>   | tripartite motif containing 56                                                                | 0.502  | 1.5E-02          |
| 223995_at    | <i>SLC12A9</i>  | solute carrier family 12 (potassium/chloride transporters), member 9                          | 0.501  | 1.5E-02          |
| 224097_s_at  | <i>F11R</i>     | F11 receptor                                                                                  | 0.501  | 1.5E-02          |
| 215760_s_at  | <i>SBNO2</i>    | strawberry notch homolog 2 (Drosophila)                                                       | 0.501  | 1.5E-02          |
| 44654_at     | <i>G6PC3</i>    | glucose 6 phosphatase, catalytic, 3                                                           | 0.501  | 1.5E-02          |
| 209454_s_at  | <i>TEAD3</i>    | TEA domain family member 3                                                                    | 0.500  | 1.6E-02          |
| 202627_s_at  | <i>SERPINE1</i> | serpin peptidase inhibitor, clade E (nexin, plasminogen activator inhibitor type 1), member 1 | 0.499  | 1.6E-02          |
| 201160_s_at  | <i>CSDA</i>     | cold shock domain protein A                                                                   | 0.499  | 1.6E-02          |
| 211651_s_at  | <i>LAMB1</i>    | laminin, beta 1                                                                               | 0.499  | 1.6E-02          |
| 218982_s_at  | <i>MRPS17</i>   | mitochondrial ribosomal protein S17                                                           | 0.498  | 1.6E-02          |
| 201680_x_at  | <i>SRRT</i>     | serrate RNA effector molecule homolog (Arabidopsis)                                           | 0.498  | 1.6E-02          |
| 203474_at    | <i>IQGAP2</i>   | IQ motif containing GTPase activating protein 2                                               | 0.498  | 1.6E-02          |
| 43977_at     | <i>TMEM161A</i> | transmembrane protein 161A                                                                    | 0.498  | 1.6E-02          |
| 219773_at    | <i>NOX4</i>     | NADPH oxidase 4                                                                               | 0.498  | 1.6E-02          |
| 205812_s_at  | <i>TMED9</i>    | transmembrane emp24 protein transport domain containing 9                                     | 0.498  | 1.6E-02          |
| 213523_at    | <i>CCNE1</i>    | cyclin E1                                                                                     | 0.498  | 1.6E-02          |
| 217750_s_at  | <i>UBE2Z</i>    | ubiquitin-conjugating enzyme E2Z                                                              | 0.497  | 1.6E-02          |
| 200838_at    | <i>CTSB</i>     | cathepsin B                                                                                   | 0.497  | 1.6E-02          |
| 203560_at    | <i>GGH</i>      | gamma-glutamyl hydrolase (conjugase, folylpolyglutamyl hydrolase)                             | 0.497  | 1.6E-02          |
| 203164_at    | <i>SLC33A1</i>  | solute carrier family 33 (acetyl-CoA transporter), member 1                                   | 0.497  | 1.6E-02          |
| 223222_at    | <i>SLC25A19</i> | solute carrier family 25 (mitochondrial thiamine pyrophosphate carrier), member 19            | 0.497  | 1.6E-02          |
| 210183_x_at  | <i>PNN</i>      | pinin, desmosome associated protein                                                           | 0.497  | 1.6E-02          |
| 222757_s_at  | <i>ZAK</i>      | sterile alpha motif and leucine zipper containing kinase AZK                                  | 0.497  | 1.6E-02          |
| 210095_s_at  | <i>IGFBP3</i>   | insulin-like growth factor binding protein 3                                                  | 0.496  | 1.7E-02          |
| 211429_s_at  | <i>SERPINA1</i> | serpin peptidase inhibitor, clade A (alpha-1 antiproteinase, antitrypsin), member 1           | 0.496  | 1.7E-02          |
| 203576_at    | <i>BCAT2</i>    | branched chain amino-acid transaminase 2, mitochondrial                                       | 0.496  | 1.7E-02          |

| Probeset ID  | Gene symbol     | Gene description                                                                               | $\rho$ | Adjusted<br><i>P</i> -value |
|--------------|-----------------|------------------------------------------------------------------------------------------------|--------|-----------------------------|
| 212086_x_at  | <i>LMNA</i>     | lamin A/C                                                                                      | 0.496  | 1.7E-02                     |
| 202120_x_at  | <i>AP2S1</i>    | adaptor-related protein complex 2, sigma 1 subunit                                             | 0.496  | 1.7E-02                     |
| 210150_s_at  | <i>LAMA5</i>    | laminin, alpha 5                                                                               | 0.496  | 1.7E-02                     |
| 201110_s_at  | <i>THBS1</i>    | thrombospondin 1                                                                               | 0.496  | 1.7E-02                     |
| 244654_at    | <i>MYO1G</i>    | myosin IG                                                                                      | 0.495  | 1.7E-02                     |
| 1562415_a_at | <i>SPOCD1</i>   | SPOC domain containing 1                                                                       | 0.495  | 1.7E-02                     |
| 213418_at    | <i>HSPA6</i>    | heat shock 70kDa protein 6 (HSP70B')                                                           | 0.495  | 1.7E-02                     |
| 211713_x_at  | <i>KIAA0101</i> | KIAA0101                                                                                       | 0.495  | 1.7E-02                     |
| 225605_at    | <i>TP53I13</i>  | tumor protein p53 inducible protein 13                                                         | 0.494  | 1.7E-02                     |
| 202016_at    | <i>MEST</i>     | mesoderm specific transcript homolog (mouse)                                                   | 0.494  | 1.7E-02                     |
| 208815_x_at  | <i>HSPA4</i>    | heat shock 70kDa protein 4                                                                     | 0.493  | 1.8E-02                     |
| 201422_at    | <i>IFI30</i>    | interferon, gamma-inducible protein 30                                                         | 0.493  | 1.8E-02                     |
| 217966_s_at  | <i>FAM129A</i>  | family with sequence similarity 129, member A                                                  | 0.493  | 1.8E-02                     |
| 213139_at    | <i>SNAI2</i>    | snail homolog 2 (Drosophila)                                                                   | 0.493  | 1.8E-02                     |
| 38671_at     | <i>PLXND1</i>   | plexin D1                                                                                      | 0.492  | 1.8E-02                     |
| 201069_at    | <i>MMP2</i>     | matrix metalloproteinase 2 (gelatinase A, 72kDa gelatinase, 72kDa type IV collagenase)         | 0.492  | 1.8E-02                     |
| 201890_at    | <i>RRM2</i>     | ribonucleotide reductase M2                                                                    | 0.492  | 1.8E-02                     |
| 1558693_s_at | <i>C1orf85</i>  | chromosome 1 open reading frame 85                                                             | 0.492  | 1.8E-02                     |
| 202870_s_at  | <i>CDC20</i>    | cell division cycle 20 homolog (S. cerevisiae)                                                 | 0.492  | 1.8E-02                     |
| 211668_s_at  | <i>PLAU</i>     | plasminogen activator, urokinase                                                               | 0.492  | 1.8E-02                     |
| 222154_s_at  | <i>SPATS2L</i>  | spermatogenesis associated, serine-rich 2-like                                                 | 0.492  | 1.8E-02                     |
| 216306_x_at  | <i>PTBP1</i>    | polypyrimidine tract binding protein 1                                                         | 0.491  | 1.8E-02                     |
| 203046_s_at  | <i>TIMELESS</i> | timeless homolog (Drosophila)                                                                  | 0.491  | 1.8E-02                     |
| 227013_at    | <i>LATS2</i>    | LATS, large tumor suppressor, homolog 2 (Drosophila)                                           | 0.491  | 1.8E-02                     |
| 217716_s_at  | <i>SEC61A1</i>  | Sec61 alpha 1 subunit (S. cerevisiae)                                                          | 0.491  | 1.8E-02                     |
| 200654_at    | <i>P4HB</i>     | prolyl 4-hydroxylase, beta polypeptide                                                         | 0.491  | 1.8E-02                     |
| 1558511_s_at | <i>ESYT2</i>    | extended synaptotagmin-like protein 2                                                          | 0.491  | 1.8E-02                     |
| 201584_s_at  | <i>DDX39A</i>   | DEAD (Asp-Glu-Ala-Asp) box polypeptide 39A                                                     | 0.491  | 1.8E-02                     |
| 200666_s_at  | <i>DNAJB1</i>   | DnaJ (Hsp40) homolog, subfamily B, member 1                                                    | 0.490  | 1.8E-02                     |
| 206540_at    | <i>GLB1L</i>    | galactosidase, beta 1-like                                                                     | 0.490  | 1.8E-02                     |
| 209129_at    | <i>TRIP6</i>    | thyroid hormone receptor interactor 6                                                          | 0.490  | 1.8E-02                     |
| 209191_at    | <i>TUBB6</i>    | tubulin, beta 6 class V                                                                        | 0.489  | 1.9E-02                     |
| 211343_s_at  | <i>COL13A1</i>  | collagen, type XIII, alpha 1                                                                   | 0.489  | 1.9E-02                     |
| 210187_at    | <i>FKBP1A</i>   | FK506 binding protein 1A, 12kDa                                                                | 0.489  | 1.9E-02                     |
| 205381_at    | <i>LRRC17</i>   | leucine rich repeat containing 17                                                              | 0.489  | 1.9E-02                     |
| 239930_at    | <i>GALNT2</i>   | UDP-N-acetyl-alpha-D-galactosamine:polypeptide N-acetylgalactosaminyltransferase 2 (GalNAc-T2) | 0.489  | 1.9E-02                     |
| 209172_s_at  | <i>CENPF</i>    | centromere protein F, 350/400kDa (mitosin)                                                     | 0.489  | 1.9E-02                     |
| 201615_x_at  | <i>CALD1</i>    | caldesmon 1                                                                                    | 0.489  | 1.9E-02                     |
| 200903_s_at  | <i>AHCY</i>     | adenosylhomocysteinase                                                                         | 0.488  | 1.9E-02                     |
| 219073_s_at  | <i>OSBPL10</i>  | oxysterol binding protein-like 10                                                              | 0.488  | 1.9E-02                     |
| 228559_at    | <i>CENPN</i>    | centromere protein N                                                                           | 0.488  | 1.9E-02                     |
| 204998_s_at  | <i>ATF5</i>     | activating transcription factor 5                                                              | 0.488  | 1.9E-02                     |
| 223159_s_at  | <i>NEK6</i>     | NIMA (never in mitosis gene a)-related kinase 6                                                | 0.488  | 1.9E-02                     |
| 201896_s_at  | <i>PSRC1</i>    | proline/serine-rich coiled-coil 1                                                              | 0.487  | 1.9E-02                     |
| 207828_s_at  | <i>CENPF</i>    | centromere protein F, 350/400kDa (mitosin)                                                     | 0.487  | 1.9E-02                     |
| 117_at       | <i>HSPA6</i>    | heat shock 70kDa protein 6 (HSP70B')                                                           | 0.486  | 1.9E-02                     |
| 204641_at    | <i>NEK2</i>     | NIMA (never in mitosis gene a)-related kinase 2                                                | 0.486  | 1.9E-02                     |

| Probeset ID  | Gene symbol     | Gene description                                                                              | $\rho$ | Adjusted P-value |
|--------------|-----------------|-----------------------------------------------------------------------------------------------|--------|------------------|
| 201841_s_at  | <i>HSPB1</i>    | heat shock 27kDa protein 1                                                                    | 0.486  | 1.9E-02          |
| 212809_at    | <i>NFATC2IP</i> | nuclear factor of activated T-cells, cytoplasmic, calcineurin-dependent 2 interacting protein | 0.486  | 1.9E-02          |
| 222662_at    | <i>PPP1R3B</i>  | protein phosphatase 1, regulatory subunit 3B                                                  | 0.486  | 1.9E-02          |
| 216253_s_at  | <i>PARVB</i>    | parvin, beta                                                                                  | 0.486  | 2.0E-02          |
| 57163_at     | <i>ELOVL1</i>   | ELOVL fatty acid elongase 1                                                                   | 0.486  | 2.0E-02          |
| 216264_s_at  | <i>LAMB2</i>    | laminin, beta 2 (laminin S)                                                                   | 0.485  | 2.0E-02          |
| 200923_at    | <i>LGALS3BP</i> | lectin, galactoside-binding, soluble, 3 binding protein                                       | 0.485  | 2.0E-02          |
| 225345_s_at  | <i>FBXO32</i>   | F-box protein 32                                                                              | 0.485  | 2.0E-02          |
| 224585_x_at  | <i>ACTG1</i>    | actin, gamma 1                                                                                | 0.485  | 2.0E-02          |
| 201550_x_at  | <i>ACTG1</i>    | actin, gamma 1                                                                                | 0.484  | 2.0E-02          |
| 202122_s_at  | <i>PLIN3</i>    | perilipin 3                                                                                   | 0.484  | 2.0E-02          |
| 202868_s_at  | <i>POP4</i>     | processing of precursor 4, ribonuclease P/MRP subunit (S. cerevisiae)                         | 0.483  | 2.0E-02          |
| 225898_at    | <i>WDR54</i>    | WD repeat domain 54                                                                           | 0.483  | 2.0E-02          |
| 235508_at    | <i>PML</i>      | promyelocytic leukemia                                                                        | 0.483  | 2.1E-02          |
| 219066_at    | <i>PPCDC</i>    | phosphopantothenoylcysteine decarboxylase                                                     | 0.482  | 2.1E-02          |
| 217728_at    | <i>SI00A6</i>   | S100 calcium binding protein A6                                                               | 0.482  | 2.1E-02          |
| 225059_at    | <i>AGTRAP</i>   | angiotensin II receptor-associated protein                                                    | 0.482  | 2.1E-02          |
| 213125_at    | <i>OLFML2B</i>  | olfactomedin-like 2B                                                                          | 0.482  | 2.1E-02          |
| 201555_at    | <i>MCM3</i>     | minichromosome maintenance complex component 3                                                | 0.481  | 2.1E-02          |
| 210999_s_at  | <i>GRB10</i>    | growth factor receptor-bound protein 10                                                       | 0.481  | 2.1E-02          |
| 224864_at    | <i>SRA1</i>     | steroid receptor RNA activator 1                                                              | 0.481  | 2.1E-02          |
| 1555758_a_at | <i>CDKN3</i>    | cyclin-dependent kinase inhibitor 3                                                           | 0.481  | 2.1E-02          |
| 209211_at    | <i>KLF5</i>     | Kruppel-like factor 5 (intestinal)                                                            | 0.481  | 2.1E-02          |
| 220134_x_at  | <i>FAM176B</i>  | family with sequence similarity 176, member B                                                 | 0.481  | 2.1E-02          |
| 212015_x_at  | <i>PTBP1</i>    | polypyrimidine tract binding protein 1                                                        | 0.481  | 2.1E-02          |
| 238532_at    | <i>DPF3</i>     | D4, zinc and double PHD fingers, family 3                                                     | 0.480  | 2.1E-02          |
| 2028_s_at    | <i>E2F1</i>     | E2F transcription factor 1                                                                    | 0.480  | 2.1E-02          |
| 204298_s_at  | <i>LOX</i>      | lysyl oxidase                                                                                 | 0.480  | 2.1E-02          |
| 205479_s_at  | <i>PLAU</i>     | plasminogen activator, urokinase                                                              | 0.480  | 2.1E-02          |
| 209100_at    | <i>IFRD2</i>    | interferon-related developmental regulator 2                                                  | 0.480  | 2.1E-02          |
| 227313_at    | <i>CNPY4</i>    | canopy 4 homolog (zebrafish)                                                                  | 0.480  | 2.1E-02          |
| 204342_at    | <i>SLC25A24</i> | solute carrier family 25 (mitochondrial carrier; phosphate carrier), member 24                | 0.480  | 2.1E-02          |
| 226217_at    | <i>SLC30A7</i>  | solute carrier family 30 (zinc transporter), member 7                                         | 0.480  | 2.1E-02          |
| 210023_s_at  | <i>PCGF1</i>    | polycomb group ring finger 1                                                                  | 0.479  | 2.2E-02          |
| 235834_at    | <i>CALD1</i>    | Caldesmon 1                                                                                   | 0.479  | 2.2E-02          |
| 215566_x_at  | <i>LYPLA2</i>   | lysophospholipase II                                                                          | 0.479  | 2.2E-02          |
| 238075_at    | <i>CHEK1</i>    | checkpoint kinase 1                                                                           | 0.479  | 2.2E-02          |
| 237817_at    | <i>SSR3</i>     | signal sequence receptor, gamma (translocon-associated protein gamma)                         | 0.479  | 2.2E-02          |
| 212364_at    | <i>MYO1B</i>    | myosin IB                                                                                     | 0.479  | 2.2E-02          |
| 204252_at    | <i>CDK2</i>     | cyclin-dependent kinase 2                                                                     | 0.478  | 2.2E-02          |
| 218543_s_at  | <i>PARP12</i>   | poly (ADP-ribose) polymerase family, member 12                                                | 0.478  | 2.2E-02          |
| 225592_at    | <i>NRM</i>      | nurim (nuclear envelope membrane protein)                                                     | 0.478  | 2.2E-02          |
| 37965_at     | <i>PARVB</i>    | parvin, beta                                                                                  | 0.478  | 2.2E-02          |
| 201617_x_at  | <i>CALD1</i>    | caldesmon 1                                                                                   | 0.478  | 2.2E-02          |
| 203967_at    | <i>CDC6</i>     | cell division cycle 6 homolog (S. cerevisiae)                                                 | 0.478  | 2.2E-02          |

| Probeset ID | Gene symbol      | Gene description                                                                             | $\rho$ | Adjusted P-value |
|-------------|------------------|----------------------------------------------------------------------------------------------|--------|------------------|
| 41220_at    | <i>SEPT9</i>     | septin 9                                                                                     | 0.478  | 2.2E-02          |
| 217937_s_at | <i>HDAC7</i>     | histone deacetylase 7                                                                        | 0.478  | 2.2E-02          |
| 212472_at   | <i>MICAL2</i>    | microtubule associated monooxygenase, calponin and LIM domain containing 2                   | 0.477  | 2.2E-02          |
| 206662_at   | <i>GLRX</i>      | glutaredoxin (thioltransferase)                                                              | 0.477  | 2.2E-02          |
| 215380_s_at | <i>GGCT</i>      | gamma-glutamylcyclotransferase                                                               | 0.477  | 2.2E-02          |
| 209408_at   | <i>KIF2C</i>     | kinesin family member 2C                                                                     | 0.477  | 2.2E-02          |
| 226294_x_at | <i>FAM91A1</i>   | family with sequence similarity 91, member A1                                                | 0.477  | 2.2E-02          |
| 233333_x_at | <i>AVIL</i>      | advillin                                                                                     | 0.477  | 2.2E-02          |
| 221923_s_at | <i>NPM1</i>      | nucleophosmin (nucleolar phosphoprotein B23, numatrin)                                       | 0.476  | 2.2E-02          |
| 229587_at   | <i>UBA2</i>      | ubiquitin-like modifier activating enzyme 2                                                  | 0.476  | 2.2E-02          |
| 207011_s_at | <i>PTK7</i>      | PTK7 protein tyrosine kinase 7                                                               | 0.476  | 2.2E-02          |
| 203554_x_at | <i>PTTG1</i>     | pituitary tumor-transforming 1                                                               | 0.476  | 2.2E-02          |
| 208436_s_at | <i>IRF7</i>      | interferon regulatory factor 7                                                               | 0.476  | 2.2E-02          |
| 200827_at   | <i>PLOD1</i>     | procollagen-lysine, 2-oxoglutarate 5-dioxygenase 1                                           | 0.476  | 2.2E-02          |
| 211970_x_at | <i>ACTG1</i>     | actin, gamma 1                                                                               | 0.476  | 2.2E-02          |
| 209709_s_at | <i>HMMR</i>      | hyaluronan-mediated motility receptor (RHAMM)                                                | 0.476  | 2.3E-02          |
| 212312_at   | <i>BCL2L1</i>    | BCL2-like 1                                                                                  | 0.475  | 2.3E-02          |
| 204822_at   | <i>TTK</i>       | TTK protein kinase                                                                           | 0.475  | 2.3E-02          |
| 212320_at   | <i>TUBB</i>      | tubulin, beta class I                                                                        | 0.475  | 2.3E-02          |
| 220968_s_at | <i>TSPAN9</i>    | tetraspanin 9                                                                                | 0.475  | 2.3E-02          |
| 201616_s_at | <i>CALD1</i>     | caldesmon 1                                                                                  | 0.474  | 2.3E-02          |
| 203325_s_at | <i>COL5A1</i>    | collagen, type V, alpha 1                                                                    | 0.474  | 2.3E-02          |
| 213911_s_at | <i>H2AFZ</i>     | H2A histone family, member Z                                                                 | 0.474  | 2.3E-02          |
| 214710_s_at | <i>CCNB1</i>     | cyclin B1                                                                                    | 0.474  | 2.3E-02          |
| 202756_s_at | <i>GPC1</i>      | glypican 1                                                                                   | 0.474  | 2.3E-02          |
| 218983_at   | <i>C1RL</i>      | complement component 1, r subcomponent-like                                                  | 0.474  | 2.3E-02          |
| 208659_at   | <i>CLIC1</i>     | chloride intracellular channel 1                                                             | 0.473  | 2.3E-02          |
| 207808_s_at | <i>PROS1</i>     | protein S (alpha)                                                                            | 0.473  | 2.4E-02          |
| 218541_s_at | <i>C8orf4</i>    | chromosome 8 open reading frame 4                                                            | 0.473  | 2.4E-02          |
| 203240_at   | <i>FCGBP</i>     | Fc fragment of IgG binding protein                                                           | 0.473  | 2.4E-02          |
| 205547_s_at | <i>TAGLN</i>     | transgelin                                                                                   | 0.472  | 2.4E-02          |
| 223158_s_at | <i>NEK6</i>      | NIMA (never in mitosis gene a)-related kinase 6                                              | 0.472  | 2.4E-02          |
| 223389_s_at | <i>ZNF581</i>    | zinc finger protein 581                                                                      | 0.472  | 2.4E-02          |
| 209806_at   | <i>HIST1H2BK</i> | histone cluster 1, H2bk                                                                      | 0.472  | 2.4E-02          |
| 202709_at   | <i>FMOD</i>      | fibromodulin                                                                                 | 0.472  | 2.4E-02          |
| 32811_at    | <i>MYO1C</i>     | myosin IC                                                                                    | 0.472  | 2.4E-02          |
| 201508_at   | <i>IGFBP4</i>    | insulin-like growth factor binding protein 4                                                 | 0.472  | 2.4E-02          |
| 201097_s_at | <i>ARF4</i>      | ADP-ribosylation factor 4                                                                    | 0.471  | 2.4E-02          |
| 219178_at   | <i>QTRTD1</i>    | queuine tRNA-ribosyltransferase domain containing 1                                          | 0.471  | 2.4E-02          |
| 202655_at   | <i>MANF</i>      | mesencephalic astrocyte-derived neurotrophic factor                                          | 0.471  | 2.4E-02          |
| 211945_s_at | <i>ITGB1</i>     | integrin, beta 1 (fibronectin receptor, beta polypeptide, antigen CD29 includes MDF2, MSK12) | 0.471  | 2.4E-02          |
| 218840_s_at | <i>NADSYN1</i>   | NAD synthetase 1                                                                             | 0.471  | 2.4E-02          |
| 160020_at   | <i>MMP14</i>     | matrix metalloproteinase 14 (membrane-inserted)                                              | 0.471  | 2.4E-02          |
| 210355_at   | <i>PTH1H</i>     | parathyroid hormone-like hormone                                                             | 0.471  | 2.4E-02          |
| 216237_s_at | <i>MCM5</i>      | minichromosome maintenance complex component 5                                               | 0.471  | 2.4E-02          |
| 226071_at   | <i>ADAMTSL4</i>  | ADAMTS-like 4                                                                                | 0.471  | 2.4E-02          |



| Probeset ID  | Gene symbol     | Gene description                                                              | $\rho$ | Adjusted P-value |
|--------------|-----------------|-------------------------------------------------------------------------------|--------|------------------|
| 202856_s_at  | <i>SLC16A3</i>  | solute carrier family 16, member 3 (monocarboxylic acid transporter 4)        | 0.470  | 2.5E-02          |
| 211983_x_at  | <i>ACTG1</i>    | actin, gamma 1                                                                | 0.469  | 2.5E-02          |
| 230448_at    | <i>SLC38A10</i> | solute carrier family 38, member 10                                           | 0.469  | 2.5E-02          |
| 1553764_a_at | <i>AJUBA</i>    | ajuba LIM protein                                                             | 0.469  | 2.5E-02          |
| 212431_at    | <i>HMGXB3</i>   | HMG box domain containing 3                                                   | 0.469  | 2.5E-02          |
| 225128_at    | <i>KDEL2</i>    | KDEL (Lys-Asp-Glu-Leu) containing 2                                           | 0.469  | 2.5E-02          |
| 218443_s_at  | <i>DAZAP1</i>   | DAZ associated protein 1                                                      | 0.469  | 2.5E-02          |
| 200656_s_at  | <i>P4HB</i>     | prolyl 4-hydroxylase, beta polypeptide                                        | 0.469  | 2.5E-02          |
| 222848_at    | <i>CENPK</i>    | centromere protein K                                                          | 0.469  | 2.5E-02          |
| 230518_at    | <i>MPZL2</i>    | myelin protein zero-like 2                                                    | 0.468  | 2.5E-02          |
| 221607_x_at  | <i>ACTG1</i>    | actin, gamma 1                                                                | 0.468  | 2.5E-02          |
| 228280_at    | <i>ZC3HAV1L</i> | zinc finger CCCH-type, antiviral 1-like                                       | 0.468  | 2.5E-02          |
| 227188_at    | <i>FAM176C</i>  | family with sequence similarity 176, member C                                 | 0.468  | 2.6E-02          |
| 227295_at    | <i>IKBIP</i>    | IKBKB interacting protein                                                     | 0.468  | 2.6E-02          |
| 217784_at    | <i>YKT6</i>     | YKT6 v-SNARE homolog ( <i>S. cerevisiae</i> )                                 | 0.467  | 2.6E-02          |
| 204825_at    | <i>MELK</i>     | maternal embryonic leucine zipper kinase                                      | 0.467  | 2.6E-02          |
| 227894_at    | <i>WDR90</i>    | WD repeat domain 90                                                           | 0.467  | 2.6E-02          |
| 201818_at    | <i>LPCAT1</i>   | lysophosphatidylcholine acyltransferase 1                                     | 0.467  | 2.6E-02          |
| 213075_at    | <i>OLFML2A</i>  | olfactomedin-like 2A                                                          | 0.467  | 2.6E-02          |
| 213923_at    | <i>RAP2B</i>    | RAP2B, member of RAS oncogene family                                          | 0.467  | 2.6E-02          |
| 204709_s_at  | <i>KIF23</i>    | kinesin family member 23                                                      | 0.466  | 2.6E-02          |
| 218248_at    | <i>FAM111A</i>  | family with sequence similarity 111, member A                                 | 0.466  | 2.6E-02          |
| 218618_s_at  | <i>FNDC3B</i>   | fibronectin type III domain containing 3B                                     | 0.466  | 2.6E-02          |
| 223700_at    | <i>MND1</i>     | meiotic nuclear divisions 1 homolog ( <i>S. cerevisiae</i> )                  | 0.466  | 2.6E-02          |
| 227038_at    | <i>SGMS2</i>    | sphingomyelin synthase 2                                                      | 0.466  | 2.6E-02          |
| 209356_x_at  | <i>EFEMP2</i>   | EGF containing fibulin-like extracellular matrix protein 2                    | 0.465  | 2.6E-02          |
| 219918_s_at  | <i>ASPM</i>     | asp (abnormal spindle) homolog, microcephaly associated ( <i>Drosophila</i> ) | 0.465  | 2.7E-02          |
| 219957_at    | <i>RUFY2</i>    | RUN and FYVE domain containing 2                                              | 0.465  | 2.7E-02          |
| 221537_at    | <i>PLXNA1</i>   | plexin A1                                                                     | 0.465  | 2.7E-02          |
| 222654_at    | <i>IMPAD1</i>   | inositol monophosphatase domain containing 1                                  | 0.465  | 2.7E-02          |
| 220954_s_at  | <i>PILRB</i>    | paired immunoglobulin-like type 2 receptor beta                               | 0.464  | 2.7E-02          |
| 235113_at    | <i>LRR1</i>     | leucine rich repeat protein 1                                                 | 0.464  | 2.7E-02          |
| 225314_at    | <i>OCIAD2</i>   | OCIA domain containing 2                                                      | 0.464  | 2.7E-02          |
| 200699_at    | <i>KDEL2</i>    | KDEL (Lys-Asp-Glu-Leu) endoplasmic reticulum protein retention receptor 2     | 0.463  | 2.7E-02          |
| 202705_at    | <i>CCNB2</i>    | cyclin B2                                                                     | 0.463  | 2.7E-02          |
| 230165_at    | <i>SGOL2</i>    | shugoshin-like 2 ( <i>S. pombe</i> )                                          | 0.463  | 2.7E-02          |
| 238756_at    | <i>GAS2L3</i>   | growth arrest-specific 2 like 3                                               | 0.463  | 2.7E-02          |
| 200844_s_at  | <i>PRDX6</i>    | peroxiredoxin 6                                                               | 0.463  | 2.7E-02          |
| 1553978_at   | <i>MEF2BNB</i>  | MEF2B neighbor                                                                | 0.463  | 2.8E-02          |
| 213790_at    | <i>ADAM12</i>   | ADAM metallopeptidase domain 12                                               | 0.463  | 2.8E-02          |
| 213446_s_at  | <i>IQGAP1</i>   | IQ motif containing GTPase activating protein 1                               | 0.462  | 2.8E-02          |
| 1555997_s_at | <i>IGFBP5</i>   | insulin-like growth factor binding protein 5                                  | 0.462  | 2.8E-02          |
| 202589_at    | <i>TYMS</i>     | thymidylate synthetase                                                        | 0.461  | 2.8E-02          |
| 202804_at    | <i>ABCC1</i>    | ATP-binding cassette, sub-family C (CFTR/MRP), member 1                       | 0.461  | 2.8E-02          |
| 224598_at    | <i>MGAT4B</i>   | mannosyl (alpha-1,3-)-glycoprotein beta-1,4-N-                                | 0.461  | 2.8E-02          |

| Probeset ID  | Gene symbol      | Gene description                                                       | $\rho$ | Adjusted P-value |
|--------------|------------------|------------------------------------------------------------------------|--------|------------------|
|              |                  | acetylglucosaminyltransferase, isozyme B                               |        |                  |
| 225269_s_at  | <i>RBMS1</i>     | RNA binding motif, single stranded interacting protein 1               | 0.461  | 2.8E-02          |
| 222512_at    | <i>NUB1</i>      | negative regulator of ubiquitin-like proteins 1                        | 0.460  | 2.9E-02          |
| 226936_at    | <i>CENPW</i>     | centromere protein W                                                   | 0.460  | 2.9E-02          |
| 209884_s_at  | <i>SLC4A7</i>    | solute carrier family 4, sodium bicarbonate cotransporter, member 7    | 0.460  | 2.9E-02          |
| 219890_at    | <i>CLEC5A</i>    | C-type lectin domain family 5, member A                                | 0.460  | 2.9E-02          |
| 226814_at    | <i>ADAMTS9</i>   | ADAM metalloproteinase with thrombospondin type 1 motif, 9             | 0.460  | 2.9E-02          |
| 203044_at    | <i>CHSY1</i>     | chondroitin sulfate synthase 1                                         | 0.460  | 2.9E-02          |
| 34260_at     | <i>TELO2</i>     | TEL2, telomere maintenance 2, homolog (S. cerevisiae)                  | 0.460  | 2.9E-02          |
| 208690_s_at  | <i>PDLIM1</i>    | PDZ and LIM domain 1                                                   | 0.460  | 2.9E-02          |
| 204078_at    | <i>LEPREL4</i>   | leprecan-like 4                                                        | 0.460  | 2.9E-02          |
| 223480_s_at  | <i>MRPL47</i>    | mitochondrial ribosomal protein L47                                    | 0.459  | 2.9E-02          |
| 213521_at    | <i>PTPN18</i>    | protein tyrosine phosphatase, non-receptor type 18 (brain-derived)     | 0.459  | 2.9E-02          |
| 1570153_at   | <i>CCDC169</i>   | coiled-coil domain containing 169                                      | 0.458  | 2.9E-02          |
| 232099_at    | <i>PCDHB16</i>   | protocadherin beta 16                                                  | 0.458  | 2.9E-02          |
| 213556_at    | <i>LOC390940</i> | uncharacterized protein ENSP00000244321                                | 0.458  | 3.0E-02          |
| 236641_at    | <i>KIF14</i>     | kinesin family member 14                                               | 0.458  | 3.0E-02          |
| 226912_at    | <i>ZDHHC23</i>   | zinc finger, DHHC-type containing 23                                   | 0.457  | 3.0E-02          |
| 204490_s_at  | <i>CD44</i>      | CD44 molecule (Indian blood group)                                     | 0.457  | 3.0E-02          |
| 202878_s_at  | <i>CD93</i>      | CD93 molecule                                                          | 0.457  | 3.0E-02          |
| 209171_at    | <i>ITPA</i>      | inosine triphosphatase (nucleoside triphosphate pyrophosphatase)       | 0.457  | 3.0E-02          |
| 201578_at    | <i>PODXL</i>     | podocalyxin-like                                                       | 0.457  | 3.0E-02          |
| 225868_at    | <i>TRIM47</i>    | tripartite motif containing 47                                         | 0.457  | 3.0E-02          |
| 202446_s_at  | <i>PLSCR1</i>    | phospholipid scramblase 1                                              | 0.457  | 3.0E-02          |
| 202620_s_at  | <i>PLOD2</i>     | procollagen-lysine, 2-oxoglutarate 5-dioxygenase 2                     | 0.456  | 3.0E-02          |
| 204163_at    | <i>EMILIN1</i>   | elastin microfibril interfacier 1                                      | 0.456  | 3.0E-02          |
| 202234_s_at  | <i>SLC16A1</i>   | solute carrier family 16, member 1 (monocarboxylic acid transporter 1) | 0.456  | 3.0E-02          |
| 205690_s_at  | <i>BUD31</i>     | BUD31 homolog (S. cerevisiae)                                          | 0.456  | 3.0E-02          |
| 225263_at    | <i>HS6ST1</i>    | heparan sulfate 6-O-sulfotransferase 1                                 | 0.456  | 3.1E-02          |
| 221739_at    | <i>C19orf10</i>  | chromosome 19 open reading frame 10                                    | 0.456  | 3.1E-02          |
| 212143_s_at  | <i>IGFBP3</i>    | insulin-like growth factor binding protein 3                           | 0.455  | 3.1E-02          |
| 222606_at    | <i>ZWILCH</i>    | Zwilch, kinetochore associated, homolog (Drosophila)                   | 0.455  | 3.1E-02          |
| 202894_at    | <i>EPHB4</i>     | EPH receptor B4                                                        | 0.455  | 3.1E-02          |
| 222978_at    | <i>SURF4</i>     | surfeit 4                                                              | 0.455  | 3.1E-02          |
| 226353_at    | <i>SPPL2A</i>    | signal peptide peptidase like 2A                                       | 0.455  | 3.1E-02          |
| 218368_s_at  | <i>TNFRSF12A</i> | tumor necrosis factor receptor superfamily, member 12A                 | 0.454  | 3.1E-02          |
| 222217_s_at  | <i>SLC27A3</i>   | solute carrier family 27 (fatty acid transporter), member 3            | 0.454  | 3.1E-02          |
| 219973_at    | <i>ARSLJ</i>     | arylsulfatase family, member J                                         | 0.454  | 3.1E-02          |
| 1553984_s_at | <i>DTYMK</i>     | deoxythymidylate kinase (thymidylate kinase)                           | 0.454  | 3.1E-02          |
| 209150_s_at  | <i>TM9SF1</i>    | transmembrane 9 superfamily member 1                                   | 0.454  | 3.1E-02          |
| 203625_x_at  | <i>SKP2</i>      | S-phase kinase-associated protein 2, E3 ubiquitin protein ligase       | 0.454  | 3.1E-02          |
| 212255_s_at  | <i>ATP2C1</i>    | ATPase, Ca <sup>++</sup> transporting, type 2C, member 1               | 0.453  | 3.2E-02          |
| 230258_at    | <i>GLIS3</i>     | GLIS family zinc finger 3                                              | 0.453  | 3.2E-02          |
| 223417_at    | <i>RAD18</i>     | RAD18 homolog (S. cerevisiae)                                          | 0.453  | 3.2E-02          |

| Probeset ID  | Gene symbol     | Gene description                                                          | $\rho$ | Adjusted P-value |
|--------------|-----------------|---------------------------------------------------------------------------|--------|------------------|
| 35626_at     | <i>SGSH</i>     | N-sulfoglucosamine sulfohydrolase                                         | 0.453  | 3.2E-02          |
| 1560116_a_at | <i>NEDD1</i>    | neural precursor cell expressed, developmentally down-regulated 1         | 0.453  | 3.2E-02          |
| 33323_r_at   | <i>SFN</i>      | stratifin                                                                 | 0.453  | 3.2E-02          |
| 201063_at    | <i>RCN1</i>     | reticulocalbin 1, EF-hand calcium binding domain                          | 0.452  | 3.2E-02          |
| 200698_at    | <i>KDELR2</i>   | KDEL (Lys-Asp-Glu-Leu) endoplasmic reticulum protein retention receptor 2 | 0.452  | 3.2E-02          |
| 226980_at    | <i>DEPDC1B</i>  | DEP domain containing 1B                                                  | 0.452  | 3.2E-02          |
| 229551_x_at  | <i>ZNF367</i>   | zinc finger protein 367                                                   | 0.452  | 3.2E-02          |
| 221245_s_at  | <i>FZD5</i>     | frizzled family receptor 5                                                | 0.452  | 3.2E-02          |
| 232381_s_at  | <i>DNAH5</i>    | dynein, axonemal, heavy chain 5                                           | 0.452  | 3.2E-02          |
| 235158_at    | <i>TMEM209</i>  | transmembrane protein 209                                                 | 0.452  | 3.2E-02          |
| 213857_s_at  | <i>CD47</i>     | CD47 molecule                                                             | 0.452  | 3.2E-02          |
| 223495_at    | <i>CCDC8</i>    | coiled-coil domain containing 8                                           | 0.452  | 3.2E-02          |
| 212920_at    | <i>REST</i>     | RE1-silencing transcription factor                                        | 0.452  | 3.2E-02          |
| 207443_at    | <i>NR2E1</i>    | nuclear receptor subfamily 2, group E, member 1                           | 0.451  | 3.3E-02          |
| 204883_s_at  | <i>HUS1</i>     | HUS1 checkpoint homolog (S. pombe)                                        | 0.451  | 3.3E-02          |
| 200700_s_at  | <i>KDELR2</i>   | KDEL (Lys-Asp-Glu-Leu) endoplasmic reticulum protein retention receptor 2 | 0.450  | 3.3E-02          |
| 218388_at    | <i>PGLS</i>     | 6-phosphogluconolactonase                                                 | 0.450  | 3.3E-02          |
| 213943_at    | <i>TWIST1</i>   | twist homolog 1 (Drosophila)                                              | 0.450  | 3.3E-02          |
| 223220_s_at  | <i>PARP9</i>    | poly (ADP-ribose) polymerase family, member 9                             | 0.450  | 3.3E-02          |
| 209835_x_at  | <i>CD44</i>     | CD44 molecule (Indian blood group)                                        | 0.450  | 3.3E-02          |
| 225945_at    | <i>ZNF655</i>   | zinc finger protein 655                                                   | 0.450  | 3.3E-02          |
| 201477_s_at  | <i>RRM1</i>     | ribonucleotide reductase M1                                               | 0.450  | 3.4E-02          |
| 204929_s_at  | <i>VAMP5</i>    | vesicle-associated membrane protein 5 (myobrevin)                         | 0.449  | 3.4E-02          |
| 227361_at    | <i>HS3ST3B1</i> | heparan sulfate (glucosamine) 3-O-sulfotransferase 3B1                    | 0.449  | 3.4E-02          |
| 206102_at    | <i>GINS1</i>    | GINS complex subunit 1 (Psf1 homolog)                                     | 0.449  | 3.4E-02          |
| 219539_at    | <i>GEMIN6</i>   | gem (nuclear organelle) associated protein 6                              | 0.449  | 3.4E-02          |
| 209264_s_at  | <i>TSPAN4</i>   | tetraspanin 4                                                             | 0.449  | 3.4E-02          |
| 209302_at    | <i>POLR2H</i>   | polymerase (RNA) II (DNA directed) polypeptide H                          | 0.449  | 3.4E-02          |
| 211015_s_at  | <i>HSPA4</i>    | heat shock 70kDa protein 4                                                | 0.449  | 3.4E-02          |
| 206111_at    | <i>RNASE2</i>   | ribonuclease, RNase A family, 2 (liver, eosinophil-derived neurotoxin)    | 0.449  | 3.4E-02          |
| 201469_s_at  | <i>SHC1</i>     | SHC (Src homology 2 domain containing) transforming protein 1             | 0.449  | 3.4E-02          |
| 201655_s_at  | <i>HSPG2</i>    | heparan sulfate proteoglycan 2                                            | 0.449  | 3.4E-02          |
| 206855_s_at  | <i>HYAL2</i>    | hyaluronoglucosaminidase 2                                                | 0.449  | 3.4E-02          |
| 209410_s_at  | <i>GRB10</i>    | growth factor receptor-bound protein 10                                   | 0.449  | 3.4E-02          |
| 225075_at    | <i>PDRG1</i>    | p53 and DNA-damage regulated 1                                            | 0.448  | 3.4E-02          |
| 201292_at    | <i>TOP2A</i>    | topoisomerase (DNA) II alpha 170kDa                                       | 0.448  | 3.4E-02          |
| 219331_s_at  | <i>KLHDC8A</i>  | kelch domain containing 8A                                                | 0.448  | 3.4E-02          |
| 221845_s_at  | <i>CLPB</i>     | ClpB caseinolytic peptidase B homolog (E. coli)                           | 0.448  | 3.4E-02          |
| 229305_at    | <i>MLF1IP</i>   | MLF1 interacting protein                                                  | 0.448  | 3.4E-02          |
| 212921_at    | <i>SMYD2</i>    | SET and MYND domain containing 2                                          | 0.447  | 3.5E-02          |
| 209708_at    | <i>MOXD1</i>    | monooxygenase, DBH-like 1                                                 | 0.447  | 3.5E-02          |
| 219787_s_at  | <i>ECT2</i>     | epithelial cell transforming sequence 2 oncogene                          | 0.447  | 3.5E-02          |
| 204159_at    | <i>CDKN2C</i>   | cyclin-dependent kinase inhibitor 2C (p18, inhibits CDK4)                 | 0.447  | 3.5E-02          |
| 209267_s_at  | <i>SLC39A8</i>  | solute carrier family 39 (zinc transporter), member 8                     | 0.447  | 3.5E-02          |

| Probeset ID | Gene symbol     | Gene description                                                     | $\rho$ | Adjusted P-value |
|-------------|-----------------|----------------------------------------------------------------------|--------|------------------|
| 201291_s_at | <i>TOP2A</i>    | topoisomerase (DNA) II alpha 170kDa                                  | 0.446  | 3.5E-02          |
| 223835_x_at | <i>OTP</i>      | orthopedia homeobox                                                  | 0.446  | 3.5E-02          |
| 219203_at   | <i>EMC9</i>     | ER membrane protein complex subunit 9                                | 0.446  | 3.5E-02          |
| 211926_s_at | <i>MYH9</i>     | myosin, heavy chain 9, non-muscle                                    | 0.446  | 3.5E-02          |
| 200601_at   | <i>ACTN4</i>    | actinin, alpha 4                                                     | 0.446  | 3.5E-02          |
| 232238_at   | <i>ASPM</i>     | asp (abnormal spindle) homolog, microcephaly associated (Drosophila) | 0.446  | 3.5E-02          |
| 201850_at   | <i>CAPG</i>     | capping protein (actin filament), gelsolin-like                      | 0.446  | 3.5E-02          |
| 202766_s_at | <i>FBN1</i>     | fibrillin 1                                                          | 0.446  | 3.5E-02          |
| 207455_at   | <i>P2RY1</i>    | purinergic receptor P2Y, G-protein coupled, 1                        | 0.446  | 3.5E-02          |
| 212646_at   | <i>RFTN1</i>    | raftlin, lipid raft linker 1                                         | 0.446  | 3.5E-02          |
| 231406_at   | <i>ORAI2</i>    | ORAI calcium release-activated calcium modulator 2                   | 0.445  | 3.6E-02          |
| 203649_s_at | <i>PLA2G2A</i>  | phospholipase A2, group IIA (platelets, synovial fluid)              | 0.445  | 3.6E-02          |
| 223172_s_at | <i>MTFP1</i>    | mitochondrial fission process 1                                      | 0.445  | 3.6E-02          |
| 202801_at   | <i>PRKACA</i>   | protein kinase, cAMP-dependent, catalytic, alpha                     | 0.445  | 3.6E-02          |
| 211042_x_at | <i>MCAM</i>     | melanoma cell adhesion molecule                                      | 0.445  | 3.6E-02          |
| 218807_at   | <i>VAV3</i>     | vav 3 guanine nucleotide exchange factor                             | 0.445  | 3.6E-02          |
| 235384_at   | <i>NUDT19</i>   | nudix (nucleoside diphosphate linked moiety X)-type motif 19         | 0.445  | 3.6E-02          |
| 213616_at   | <i>TPGS2</i>    | tubulin polyglutamylase complex subunit 2                            | 0.444  | 3.6E-02          |
| 203947_at   | <i>CSTF3</i>    | cleavage stimulation factor, 3' pre-RNA, subunit 3, 77kDa            | 0.444  | 3.6E-02          |
| 204175_at   | <i>ZNF593</i>   | zinc finger protein 593                                              | 0.444  | 3.6E-02          |
| 213076_at   | <i>ITPKC</i>    | inositol-trisphosphate 3-kinase C                                    | 0.444  | 3.6E-02          |
| 207643_s_at | <i>TNFRSF1A</i> | tumor necrosis factor receptor superfamily, member 1A                | 0.444  | 3.6E-02          |
| 208368_s_at | <i>BRCA2</i>    | breast cancer 2, early onset                                         | 0.444  | 3.6E-02          |
| 223474_at   | <i>IRF2BPL</i>  | interferon regulatory factor 2 binding protein-like                  | 0.444  | 3.6E-02          |
| 209969_s_at | <i>STAT1</i>    | signal transducer and activator of transcription 1, 91kDa            | 0.444  | 3.6E-02          |
| 226949_at   | <i>GOLGA3</i>   | golgin A3                                                            | 0.444  | 3.6E-02          |
| 202805_s_at | <i>ABCC1</i>    | ATP-binding cassette, sub-family C (CFTR/MRP), member 1              | 0.443  | 3.6E-02          |
| 234294_x_at | <i>GATAD2A</i>  | GATA zinc finger domain containing 2A                                | 0.443  | 3.7E-02          |
| 213008_at   | <i>FANCI</i>    | Fanconi anemia, complementation group I                              | 0.443  | 3.7E-02          |
| 218081_at   | <i>C20orf27</i> | chromosome 20 open reading frame 27                                  | 0.443  | 3.7E-02          |
| 204068_at   | <i>STK3</i>     | serine/threonine kinase 3                                            | 0.443  | 3.7E-02          |
| 216606_x_at | <i>LYPLA2</i>   | lysophospholipase II                                                 | 0.443  | 3.7E-02          |
| 235609_at   | <i>BRIP1</i>    | BRCA1 interacting protein C-terminal helicase 1                      | 0.443  | 3.7E-02          |
| 203234_at   | <i>UPP1</i>     | uridine phosphorylase 1                                              | 0.442  | 3.7E-02          |
| 224749_at   | <i>ITFG3</i>    | integrin alpha FG-GAP repeat containing 3                            | 0.442  | 3.7E-02          |
| 234974_at   | <i>GALM</i>     | galactose mutarotase (aldose 1-epimerase)                            | 0.442  | 3.7E-02          |
| 34868_at    | <i>SMG5</i>     | smg-5 homolog, nonsense mediated mRNA decay factor (C. elegans)      | 0.442  | 3.7E-02          |
| 218039_at   | <i>NUSAP1</i>   | nucleolar and spindle associated protein 1                           | 0.442  | 3.7E-02          |
| 33322_i_at  | <i>SFN</i>      | stratifin                                                            | 0.442  | 3.7E-02          |
| 223247_at   | <i>MED10</i>    | mediator complex subunit 10                                          | 0.442  | 3.7E-02          |
| 202737_s_at | <i>LSM4</i>     | LSM4 homolog, U6 small nuclear RNA associated (S. cerevisiae)        | 0.442  | 3.7E-02          |
| 212992_at   | <i>AHNAK2</i>   | AHNAK nucleoprotein 2                                                | 0.442  | 3.7E-02          |
| 212363_x_at | <i>ACTG1</i>    | actin, gamma 1                                                       | 0.442  | 3.7E-02          |
| 217104_at   | <i>ST20</i>     | suppressor of tumorigenicity 20                                      | 0.442  | 3.7E-02          |

| Probeset ID  | Gene symbol     | Gene description                                                       | $\rho$ | Adjusted P-value |
|--------------|-----------------|------------------------------------------------------------------------|--------|------------------|
| 218663_at    | <i>NCAPG</i>    | non-SMC condensin I complex, subunit G                                 | 0.441  | 3.8E-02          |
| 203425_s_at  | <i>IGFBP5</i>   | insulin-like growth factor binding protein 5                           | 0.441  | 3.8E-02          |
| 204865_at    | <i>CA3</i>      | carbonic anhydrase III, muscle specific                                | 0.441  | 3.8E-02          |
| 206011_at    | <i>CASP1</i>    | caspase 1, apoptosis-related cysteine peptidase                        | 0.441  | 3.8E-02          |
| 204357_s_at  | <i>LIMK1</i>    | LIM domain kinase 1                                                    | 0.440  | 3.8E-02          |
| 219004_s_at  | <i>MIS18A</i>   | MIS18 kinetochore protein homolog A (S. pombe)                         | 0.440  | 3.8E-02          |
| 229435_at    | <i>GLIS3</i>    | GLIS family zinc finger 3                                              | 0.440  | 3.8E-02          |
| 215947_s_at  | <i>FAM136A</i>  | family with sequence similarity 136, member A                          | 0.439  | 3.9E-02          |
| 222231_s_at  | <i>LRRC59</i>   | leucine rich repeat containing 59                                      | 0.439  | 3.9E-02          |
| 209561_at    | <i>THBS3</i>    | thrombospondin 3                                                       | 0.439  | 3.9E-02          |
| 222958_s_at  | <i>DEPDC1</i>   | DEP domain containing 1                                                | 0.439  | 3.9E-02          |
| 227792_at    | <i>ITPRIPL2</i> | inositol 1,4,5-trisphosphate receptor interacting protein-like 2       | 0.439  | 3.9E-02          |
| 226935_s_at  | <i>CLPTM1L</i>  | CLPTM1-like                                                            | 0.439  | 3.9E-02          |
| 204471_at    | <i>GAP43</i>    | growth associated protein 43                                           | 0.438  | 3.9E-02          |
| 219885_at    | <i>SLFN12</i>   | schlafen family member 12                                              | 0.438  | 3.9E-02          |
| 218883_s_at  | <i>MLF1IP</i>   | MLF1 interacting protein                                               | 0.438  | 3.9E-02          |
| 206316_s_at  | <i>KNTC1</i>    | kinetochore associated 1                                               | 0.438  | 4.0E-02          |
| 202998_s_at  | <i>LOXL2</i>    | lysyl oxidase-like 2                                                   | 0.438  | 4.0E-02          |
| 223394_at    | <i>SERTAD1</i>  | SERTA domain containing 1                                              | 0.438  | 4.0E-02          |
| 215446_s_at  | <i>LOX</i>      | lysyl oxidase                                                          | 0.438  | 4.0E-02          |
| 200961_at    | <i>SEPHS2</i>   | selenophosphate synthetase 2                                           | 0.438  | 4.0E-02          |
| 1555724_s_at | <i>TAGLN</i>    | transgelin                                                             | 0.437  | 4.0E-02          |
| 201251_at    | <i>PKM</i>      | pyruvate kinase, muscle                                                | 0.437  | 4.0E-02          |
| 203270_at    | <i>DTYMK</i>    | deoxythymidylate kinase (thymidylate kinase)                           | 0.437  | 4.0E-02          |
| 209082_s_at  | <i>COL18A1</i>  | collagen, type XVIII, alpha 1                                          | 0.437  | 4.0E-02          |
| 202408_s_at  | <i>PRPF31</i>   | PRP31 pre-mRNA processing factor 31 homolog (S. cerevisiae)            | 0.437  | 4.0E-02          |
| 208370_s_at  | <i>RCAN1</i>    | regulator of calcineurin 1                                             | 0.437  | 4.0E-02          |
| 227480_at    | <i>SUSD2</i>    | sushi domain containing 2                                              | 0.437  | 4.0E-02          |
| 218095_s_at  | <i>TMEM165</i>  | transmembrane protein 165                                              | 0.437  | 4.0E-02          |
| 212298_at    | <i>NRP1</i>     | neuropilin 1                                                           | 0.436  | 4.0E-02          |
| 203167_at    | <i>TIMP2</i>    | TIMP metalloproteinase inhibitor 2                                     | 0.436  | 4.0E-02          |
| 213861_s_at  | <i>METTL21B</i> | methyltransferase like 21B                                             | 0.436  | 4.0E-02          |
| 218159_at    | <i>DDRGK1</i>   | DDRGK domain containing 1                                              | 0.436  | 4.0E-02          |
| 219293_s_at  | <i>OLA1</i>     | Obg-like ATPase 1                                                      | 0.436  | 4.0E-02          |
| 201663_s_at  | <i>SMC4</i>     | structural maintenance of chromosomes 4                                | 0.435  | 4.1E-02          |
| 209900_s_at  | <i>SLC16A1</i>  | solute carrier family 16, member 1 (monocarboxylic acid transporter 1) | 0.435  | 4.1E-02          |
| 217933_s_at  | <i>LAP3</i>     | leucine aminopeptidase 3                                               | 0.435  | 4.1E-02          |
| 205211_s_at  | <i>RINI</i>     | Ras and Rab interactor 1                                               | 0.435  | 4.1E-02          |
| 201088_at    | <i>KPNA2</i>    | karyopherin alpha 2 (RAG cohort 1, importin alpha 1)                   | 0.435  | 4.1E-02          |
| 218009_s_at  | <i>PRC1</i>     | protein regulator of cytokinesis 1                                     | 0.434  | 4.1E-02          |
| 202951_at    | <i>STK38</i>    | serine/threonine kinase 38                                             | 0.434  | 4.1E-02          |
| 205394_at    | <i>CHEK1</i>    | checkpoint kinase 1                                                    | 0.434  | 4.1E-02          |
| 228188_at    | <i>FOSL2</i>    | FOS-like antigen 2                                                     | 0.434  | 4.1E-02          |
| 211977_at    | <i>GPR107</i>   | G protein-coupled receptor 107                                         | 0.434  | 4.1E-02          |
| 223165_s_at  | <i>IP6K2</i>    | inositol hexakisphosphate kinase 2                                     | 0.434  | 4.1E-02          |
| 228281_at    | <i>C11orf82</i> | chromosome 11 open reading frame 82                                    | 0.434  | 4.1E-02          |

| Probeset ID  | Gene symbol      | Gene description                                                       | $\rho$ | Adjusted P-value |
|--------------|------------------|------------------------------------------------------------------------|--------|------------------|
| 231249_at    | <i>SZT2</i>      | seizure threshold 2 homolog (mouse)                                    | 0.434  | 4.2E-02          |
| 201798_s_at  | <i>MYOF</i>      | myoferlin                                                              | 0.434  | 4.2E-02          |
| 36936_at     | <i>TSTA3</i>     | tissue specific transplantation antigen P35B                           | 0.434  | 4.2E-02          |
| 227467_at    | <i>RDH10</i>     | retinol dehydrogenase 10 (all-trans)                                   | 0.434  | 4.2E-02          |
| 228729_at    | <i>CCNB1</i>     | cyclin B1                                                              | 0.434  | 4.2E-02          |
| 202912_at    | <i>ADM</i>       | adrenomedullin                                                         | 0.433  | 4.2E-02          |
| 227249_at    | <i>NDE1</i>      | NudE nuclear distribution E homolog 1 (A. nidulans)                    | 0.433  | 4.2E-02          |
| 212063_at    | <i>CD44</i>      | CD44 molecule (Indian blood group)                                     | 0.433  | 4.2E-02          |
| 217855_x_at  | <i>SDF4</i>      | stromal cell derived factor 4                                          | 0.433  | 4.2E-02          |
| 219588_s_at  | <i>NCAPG2</i>    | non-SMC condensin II complex, subunit G2                               | 0.433  | 4.2E-02          |
| 225969_at    | <i>ALKBH6</i>    | alkB, alkylation repair homolog 6 (E. coli)                            | 0.433  | 4.2E-02          |
| 221274_s_at  | <i>LMAN2L</i>    | lectin, mannose-binding 2-like                                         | 0.433  | 4.2E-02          |
| 212219_at    | <i>PSME4</i>     | proteasome (prosome, macropain) activator subunit 4                    | 0.433  | 4.2E-02          |
| 212280_x_at  | <i>ATG4B</i>     | autophagy related 4B, cysteine peptidase                               | 0.433  | 4.2E-02          |
| 227352_at    | <i>SWSAP1</i>    | SWIM-type zinc finger 7 associated protein 1                           | 0.432  | 4.2E-02          |
| 200650_s_at  | <i>LDHA</i>      | lactate dehydrogenase A                                                | 0.432  | 4.3E-02          |
| 1555167_s_at | <i>NAMPT</i>     | nicotinamide phosphoribosyltransferase                                 | 0.432  | 4.3E-02          |
| 208808_s_at  | <i>HMGB2</i>     | high mobility group box 2                                              | 0.432  | 4.3E-02          |
| 227100_at    | <i>B3GALTL</i>   | beta 1,3-galactosyltransferase-like                                    | 0.432  | 4.3E-02          |
| 233734_s_at  | <i>OSBPL5</i>    | oxysterol binding protein-like 5                                       | 0.432  | 4.3E-02          |
| 212533_at    | <i>WEE1</i>      | WEE1 homolog (S. pombe)                                                | 0.431  | 4.3E-02          |
| 216262_s_at  | <i>TGIF2</i>     | TGFB-induced factor homeobox 2                                         | 0.431  | 4.3E-02          |
| 228873_at    | <i>COL22A1</i>   | collagen, type XXII, alpha 1                                           | 0.431  | 4.3E-02          |
| 221521_s_at  | <i>GINS2</i>     | GINS complex subunit 2 (Psf2 homolog)                                  | 0.431  | 4.3E-02          |
| 31837_at     | <i>LMF2</i>      | lipase maturation factor 2                                             | 0.431  | 4.3E-02          |
| 201560_at    | <i>CLIC4</i>     | chloride intracellular channel 4                                       | 0.431  | 4.3E-02          |
| 221794_at    | <i>DOCK6</i>     | dedicator of cytokinesis 6                                             | 0.431  | 4.3E-02          |
| 242041_at    | <i>CSPP1</i>     | centrosome and spindle pole associated protein 1                       | 0.431  | 4.3E-02          |
| 221605_s_at  | <i>PIPOX</i>     | pipecolic acid oxidase                                                 | 0.431  | 4.3E-02          |
| 222067_x_at  | <i>HIST1H2BD</i> | histone cluster 1, H2bd                                                | 0.431  | 4.3E-02          |
| 203133_at    | <i>SEC61B</i>    | Sec61 beta subunit                                                     | 0.431  | 4.3E-02          |
| 225019_at    | <i>CAMK2D</i>    | calcium/calmodulin-dependent protein kinase II delta                   | 0.431  | 4.3E-02          |
| 203731_s_at  | <i>ZKSCAN5</i>   | zinc finger with KRAB and SCAN domains 5                               | 0.430  | 4.3E-02          |
| 205918_at    | <i>SLC4A3</i>    | solute carrier family 4, anion exchanger, member 3                     | 0.430  | 4.4E-02          |
| 204779_s_at  | <i>HOXB7</i>     | homeobox B7                                                            | 0.430  | 4.4E-02          |
| 213379_at    | <i>COQ2</i>      | coenzyme Q2 homolog, prenyltransferase (yeast)                         | 0.430  | 4.4E-02          |
| 201252_at    | <i>PSMC4</i>     | proteasome (prosome, macropain) 26S subunit, ATPase, 4                 | 0.430  | 4.4E-02          |
| 1560916_a_at | <i>DPY19L1</i>   | dpy-19-like 1 (C. elegans)                                             | 0.429  | 4.4E-02          |
| 202270_at    | <i>GBP1</i>      | guanylate binding protein 1, interferon-inducible                      | 0.429  | 4.4E-02          |
| 212014_x_at  | <i>CD44</i>      | CD44 molecule (Indian blood group)                                     | 0.429  | 4.4E-02          |
| 202855_s_at  | <i>SLC16A3</i>   | solute carrier family 16, member 3 (monocarboxylic acid transporter 4) | 0.429  | 4.4E-02          |
| 209642_at    | <i>BUB1</i>      | budding uninhibited by benzimidazoles 1 homolog (yeast)                | 0.429  | 4.4E-02          |
| 207467_x_at  | <i>CAST</i>      | calpastatin                                                            | 0.429  | 4.4E-02          |
| 230836_at    | <i>ST8SIA4</i>   | ST8 alpha-N-acetyl-neuraminide alpha-2,8-sialyltransferase 4           | 0.429  | 4.4E-02          |
| 203578_s_at  | <i>SLC7A6</i>    | solute carrier family 7 (amino acid transporter light chain,           | 0.429  | 4.5E-02          |

| Probeset ID | Gene symbol     | Gene description                                                                           | $\rho$ | Adjusted P-value |
|-------------|-----------------|--------------------------------------------------------------------------------------------|--------|------------------|
| 217854_s_at | <i>POLR2E</i>   | y+L system), member 6<br>polymerase (RNA) II (DNA directed) polypeptide E,<br>25kDa        | 0.429  | 4.5E-02          |
| 201673_s_at | <i>GYS1</i>     | glycogen synthase 1 (muscle)                                                               | 0.428  | 4.5E-02          |
| 225801_at   | <i>FBXO32</i>   | F-box protein 32                                                                           | 0.428  | 4.5E-02          |
| 202729_s_at | <i>LTBP1</i>    | latent transforming growth factor beta binding protein 1                                   | 0.428  | 4.5E-02          |
| 243403_x_at | <i>CPM</i>      | carboxypeptidase M                                                                         | 0.428  | 4.5E-02          |
| 200829_x_at | <i>ZNF207</i>   | zinc finger protein 207                                                                    | 0.428  | 4.5E-02          |
| 219257_s_at | <i>SPHK1</i>    | sphingosine kinase 1                                                                       | 0.428  | 4.5E-02          |
| 231823_s_at | <i>SH3PXD2B</i> | SH3 and PX domains 2B                                                                      | 0.428  | 4.5E-02          |
| 201726_at   | <i>ELAVL1</i>   | ELAV (embryonic lethal, abnormal vision, Drosophila)-<br>like 1 (Hu antigen R)             | 0.428  | 4.5E-02          |
| 204162_at   | <i>NDC80</i>    | NDC80 kinetochore complex component homolog (S.<br>cerevisiae)                             | 0.428  | 4.5E-02          |
| 219933_at   | <i>GLRX2</i>    | glutaredoxin 2                                                                             | 0.428  | 4.5E-02          |
| 223553_s_at | <i>DOK3</i>     | docking protein 3                                                                          | 0.427  | 4.5E-02          |
| 218018_at   | <i>PDXK</i>     | pyridoxal (pyridoxine, vitamin B6) kinase                                                  | 0.427  | 4.5E-02          |
| 207610_s_at | <i>EMR2</i>     | egf-like module containing, mucin-like, hormone<br>receptor-like 2                         | 0.427  | 4.5E-02          |
| 211864_s_at | <i>MYOF</i>     | myoferlin                                                                                  | 0.427  | 4.6E-02          |
| 219183_s_at | <i>CYTH4</i>    | cytohesin 4                                                                                | 0.427  | 4.6E-02          |
| 203022_at   | <i>RNASEH2A</i> | ribonuclease H2, subunit A                                                                 | 0.426  | 4.6E-02          |
| 223381_at   | <i>NUF2</i>     | NUF2, NDC80 kinetochore complex component,<br>homolog (S. cerevisiae)                      | 0.426  | 4.6E-02          |
| 201645_at   | <i>TNC</i>      | tenascin C                                                                                 | 0.426  | 4.6E-02          |
| 214452_at   | <i>BCAT1</i>    | branched chain amino-acid transaminase 1, cytosolic                                        | 0.426  | 4.6E-02          |
| 221827_at   | <i>RBCK1</i>    | RanBP-type and C3HC4-type zinc finger containing 1                                         | 0.426  | 4.6E-02          |
| 204262_s_at | <i>PSEN2</i>    | presenilin 2 (Alzheimer disease 4)                                                         | 0.425  | 4.7E-02          |
| 208091_s_at | <i>VOPPI</i>    | vesicular, overexpressed in cancer, prosurvival protein 1                                  | 0.425  | 4.7E-02          |
| 64440_at    | <i>IL17RC</i>   | interleukin 17 receptor C                                                                  | 0.425  | 4.7E-02          |
| 200611_s_at | <i>WDR1</i>     | WD repeat domain 1                                                                         | 0.425  | 4.7E-02          |
| 202133_at   | <i>WWTR1</i>    | WW domain containing transcription regulator 1                                             | 0.425  | 4.7E-02          |
| 211963_s_at | <i>ARPC5</i>    | actin related protein 2/3 complex, subunit 5, 16kDa                                        | 0.425  | 4.7E-02          |
| 201765_s_at | <i>HEXA</i>     | hexosaminidase A (alpha polypeptide)                                                       | 0.425  | 4.7E-02          |
| 208691_at   | <i>TFRC</i>     | transferrin receptor (p90, CD71)                                                           | 0.425  | 4.7E-02          |
| 200678_x_at | <i>GRN</i>      | granulin                                                                                   | 0.424  | 4.7E-02          |
| 221258_s_at | <i>KIF18A</i>   | kinesin family member 18A                                                                  | 0.424  | 4.7E-02          |
| 227515_at   | <i>STAMBP</i>   | STAM binding protein                                                                       | 0.424  | 4.7E-02          |
| 201937_s_at | <i>DNPEP</i>    | aspartyl aminopeptidase                                                                    | 0.424  | 4.7E-02          |
| 226063_at   | <i>VAV2</i>     | vav 2 guanine nucleotide exchange factor                                                   | 0.424  | 4.7E-02          |
| 212621_at   | <i>TMEM194A</i> | transmembrane protein 194A                                                                 | 0.423  | 4.8E-02          |
| 214426_x_at | <i>CHAF1A</i>   | chromatin assembly factor 1, subunit A (p150)                                              | 0.423  | 4.8E-02          |
| 243296_at   | <i>NAMPT</i>    | Nicotinamide phosphoribosyltransferase                                                     | 0.423  | 4.8E-02          |
| 223396_at   | <i>TMEM60</i>   | transmembrane protein 60                                                                   | 0.423  | 4.8E-02          |
| 217751_at   | <i>GSTK1</i>    | glutathione S-transferase kappa 1                                                          | 0.423  | 4.8E-02          |
| 220189_s_at | <i>MGAT4B</i>   | mannosyl (alpha-1,3-)-glycoprotein beta-1,4-N-<br>acetylglucosaminyltransferase, isozyme B | 0.423  | 4.8E-02          |
| 210423_s_at | <i>SLC11A1</i>  | solute carrier family 11 (proton-coupled divalent metal<br>ion transporters), member 1     | 0.423  | 4.8E-02          |
| 221653_x_at | <i>APOL2</i>    | apolipoprotein L, 2                                                                        | 0.423  | 4.8E-02          |

| Probeset ID | Gene symbol      | Gene description                                                                                     | $\rho$ | Adjusted P-value |
|-------------|------------------|------------------------------------------------------------------------------------------------------|--------|------------------|
| 226385_s_at | <i>MALSU1</i>    | mitochondrial assembly of ribosomal large subunit 1                                                  | 0.423  | 4.8E-02          |
| 222684_s_at | <i>NOL10</i>     | nucleolar protein 10                                                                                 | 0.423  | 4.8E-02          |
| 234005_x_at | <i>STK36</i>     | serine/threonine kinase 36                                                                           | 0.423  | 4.8E-02          |
| 1554314_at  | <i>C6orf141</i>  | chromosome 6 open reading frame 141                                                                  | 0.423  | 4.8E-02          |
| 204402_at   | <i>RHBDD3</i>    | rhomboid domain containing 3                                                                         | 0.423  | 4.8E-02          |
| 200891_s_at | <i>SSR1</i>      | signal sequence receptor, alpha                                                                      | 0.423  | 4.8E-02          |
| 218131_s_at | <i>GATAD2A</i>   | GATA zinc finger domain containing 2A                                                                | 0.422  | 4.8E-02          |
| 222690_s_at | <i>TMEM39A</i>   | transmembrane protein 39A                                                                            | 0.422  | 4.8E-02          |
| 225614_at   | <i>SAAL1</i>     | serum amyloid A-like 1                                                                               | 0.422  | 4.8E-02          |
| 228597_at   | <i>MIS18A</i>    | MIS18 kinetochore protein homolog A (S. pombe)                                                       | 0.422  | 4.8E-02          |
| 205298_s_at | <i>BTN2A2</i>    | butyrophilin, subfamily 2, member A2                                                                 | 0.422  | 4.8E-02          |
| 210052_s_at | <i>TPX2</i>      | TPX2, microtubule-associated, homolog (Xenopus laevis)                                               | 0.422  | 4.8E-02          |
| 225524_at   | <i>ANTXR2</i>    | anthrax toxin receptor 2                                                                             | 0.422  | 4.9E-02          |
| 205542_at   | <i>STEAP1</i>    | six transmembrane epithelial antigen of the prostate 1                                               | 0.422  | 4.9E-02          |
| 226452_at   | <i>PDK1</i>      | pyruvate dehydrogenase kinase, isozyme 1                                                             | 0.421  | 4.9E-02          |
| 200931_s_at | <i>VCL</i>       | vinculin                                                                                             | 0.421  | 4.9E-02          |
| 217788_s_at | <i>GALNT2</i>    | UDP-N-acetyl-alpha-D-galactosamine:polypeptide N-acetylgalactosaminyltransferase 2 (GalNAc-T2)       | 0.421  | 4.9E-02          |
| 202628_s_at | <i>SERPINE1</i>  | serpin peptidase inhibitor, clade E (nexin, plasminogen activator inhibitor type 1), member 1        | 0.421  | 4.9E-02          |
| 211747_s_at | <i>LSM5</i>      | LSM5 homolog, U6 small nuclear RNA associated (S. cerevisiae)                                        | 0.421  | 4.9E-02          |
| 213491_x_at | <i>RPN2</i>      | ribophorin II                                                                                        | 0.421  | 4.9E-02          |
| 224387_at   | <i>COMM5</i>     | COMM domain containing 5                                                                             | 0.421  | 4.9E-02          |
| 225643_at   | <i>MAPK11P1L</i> | mitogen-activated protein kinase 1 interacting protein 1-like                                        | 0.421  | 4.9E-02          |
| 209451_at   | <i>TANK</i>      | TRAF family member-associated NFKB activator                                                         | 0.420  | 4.9E-02          |
| 213007_at   | <i>FANCI</i>     | Fanconi anemia, complementation group I                                                              | 0.420  | 5.0E-02          |
| 224428_s_at | <i>CDC47</i>     | cell division cycle associated 7                                                                     | 0.420  | 5.0E-02          |
| 201013_s_at | <i>PAICS</i>     | phosphoribosylaminoimidazole carboxylase, phosphoribosylaminoimidazole succinocarboxamide synthetase | 0.420  | 5.0E-02          |
| 242451_x_at | <i>RPS19</i>     | ribosomal protein S19                                                                                | 0.420  | 5.0E-02          |
| 209035_at   | <i>MDK</i>       | midkine (neurite growth-promoting factor 2)                                                          | 0.420  | 5.0E-02          |
| 209502_s_at | <i>BAIAP2</i>    | BAI1-associated protein 2                                                                            | 0.420  | 5.0E-02          |
| 210959_s_at | <i>SRD5A1</i>    | steroid-5-alpha-reductase, alpha polypeptide 1 (3-oxo-5 alpha-steroid delta 4-dehydrogenase alpha 1) | 0.420  | 5.0E-02          |
| 213399_x_at | <i>RPN2</i>      | ribophorin II                                                                                        | 0.420  | 5.0E-02          |
| 211959_at   | <i>IGFBP5</i>    | insulin-like growth factor binding protein 5                                                         | 0.419  | 5.0E-02          |
| 221732_at   | <i>CANT1</i>     | calcium activated nucleotidase 1                                                                     | 0.419  | 5.0E-02          |
| 202218_s_at | <i>FADS2</i>     | fatty acid desaturase 2                                                                              | -0.419 | 5.0E-02          |
| 222157_s_at | <i>WDR48</i>     | WD repeat domain 48                                                                                  | -0.419 | 5.0E-02          |
| 226674_at   | <i>SHISA4</i>    | shisa homolog 4 (Xenopus laevis)                                                                     | -0.419 | 5.0E-02          |
| 228333_at   | <i>ZEB2</i>      | zinc finger E-box binding homeobox 2                                                                 | -0.419 | 5.0E-02          |
| 201813_s_at | <i>TBC1D5</i>    | TBC1 domain family, member 5                                                                         | -0.420 | 5.0E-02          |
| 37566_at    | <i>KIAA1045</i>  | KIAA1045                                                                                             | -0.420 | 5.0E-02          |
| 206401_s_at | <i>MAPT</i>      | microtubule-associated protein tau                                                                   | -0.420 | 5.0E-02          |
| 212534_at   | <i>ZNF24</i>     | zinc finger protein 24                                                                               | -0.420 | 5.0E-02          |
| 222391_at   | <i>TMEM30A</i>   | transmembrane protein 30A                                                                            | -0.420 | 5.0E-02          |



| Probeset ID  | Gene symbol     | Gene description                                                              | $\rho$ | Adjusted P-value |
|--------------|-----------------|-------------------------------------------------------------------------------|--------|------------------|
| 212416_at    | <i>SCAMP1</i>   | secretory carrier membrane protein 1                                          | -0.420 | 5.0E-02          |
| 217722_s_at  | <i>NGRN</i>     | neugrin, neurite outgrowth associated                                         | -0.420 | 5.0E-02          |
| 217970_s_at  | <i>CNOT6</i>    | CCR4-NOT transcription complex, subunit 6                                     | -0.420 | 5.0E-02          |
| 213313_at    | <i>RABGAP1</i>  | RAB GTPase activating protein 1                                               | -0.420 | 5.0E-02          |
| 217830_s_at  | <i>NSFL1C</i>   | NSFL1 (p97) cofactor (p47)                                                    | -0.420 | 5.0E-02          |
| 202873_at    | <i>ATP6VIC1</i> | ATPase, H <sup>+</sup> transporting, lysosomal 42kDa, V1 subunit C1           | -0.420 | 5.0E-02          |
| 219009_at    | <i>C14orf93</i> | chromosome 14 open reading frame 93                                           | -0.420 | 4.9E-02          |
| 222586_s_at  | <i>OSBPL11</i>  | oxysterol binding protein-like 11                                             | -0.420 | 4.9E-02          |
| 233070_at    | <i>ZNF197</i>   | zinc finger protein 197                                                       | -0.420 | 4.9E-02          |
| 215606_s_at  | <i>ERC1</i>     | ELKS/RAB6-interacting/CAST family member 1                                    | -0.420 | 4.9E-02          |
| 221622_s_at  | <i>TMEM126B</i> | transmembrane protein 126B                                                    | -0.420 | 4.9E-02          |
| 222717_at    | <i>SDPR</i>     | serum deprivation response                                                    | -0.420 | 4.9E-02          |
| 235905_at    | <i>ZNF704</i>   | zinc finger protein 704                                                       | -0.420 | 4.9E-02          |
| 220755_s_at  | <i>C6orf48</i>  | chromosome 6 open reading frame 48                                            | -0.421 | 4.9E-02          |
| 243904_at    | <i>STXBP5</i>   | syntaxin binding protein 5 (tomosyn)                                          | -0.421 | 4.9E-02          |
| 1556021_at   | <i>GPR180</i>   | G protein-coupled receptor 180                                                | -0.421 | 4.9E-02          |
| 212286_at    | <i>ANKRD12</i>  | ankyrin repeat domain 12                                                      | -0.421 | 4.9E-02          |
| 215115_x_at  | <i>NTRK3</i>    | neurotrophic tyrosine kinase, receptor, type 3                                | -0.421 | 4.9E-02          |
| 235475_at    | <i>SERP1</i>    | stress-associated endoplasmic reticulum protein 1                             | -0.421 | 4.9E-02          |
| 203081_at    | <i>CTNNBIP1</i> | catenin, beta interacting protein 1                                           | -0.421 | 4.9E-02          |
| 215307_at    | <i>ZNF529</i>   | zinc finger protein 529                                                       | -0.421 | 4.9E-02          |
| 217833_at    | <i>SYNCRIP</i>  | synaptotagmin binding, cytoplasmic RNA interacting protein                    | -0.421 | 4.9E-02          |
| 223099_s_at  | <i>LONP2</i>    | lon peptidase 2, peroxisomal                                                  | -0.421 | 4.9E-02          |
| 1558010_s_at | <i>SLC1A2</i>   | solute carrier family 1 (glial high affinity glutamate transporter), member 2 | -0.421 | 4.9E-02          |
| 238029_s_at  | <i>SLC16A14</i> | solute carrier family 16, member 14 (monocarboxylic acid transporter 14)      | -0.421 | 4.9E-02          |
| 209159_s_at  | <i>NDRG4</i>    | NDRG family member 4                                                          | -0.421 | 4.9E-02          |
| 212602_at    | <i>WDFY3</i>    | WD repeat and FYVE domain containing 3                                        | -0.421 | 4.9E-02          |
| 228225_at    | <i>PEX2</i>     | peroxisomal biogenesis factor 2                                               | -0.421 | 4.9E-02          |
| 225163_at    | <i>FRMD4A</i>   | FERM domain containing 4A                                                     | -0.421 | 4.9E-02          |
| 202874_s_at  | <i>ATP6VIC1</i> | ATPase, H <sup>+</sup> transporting, lysosomal 42kDa, V1 subunit C1           | -0.421 | 4.9E-02          |
| 217100_s_at  | <i>UBXN7</i>    | UBX domain protein 7                                                          | -0.421 | 4.9E-02          |
| 218733_at    | <i>MSL2</i>     | male-specific lethal 2 homolog (Drosophila)                                   | -0.421 | 4.9E-02          |
| 235065_at    | <i>FAM59A</i>   | family with sequence similarity 59, member A                                  | -0.421 | 4.9E-02          |
| 207135_at    | <i>HTR2A</i>    | 5-hydroxytryptamine (serotonin) receptor 2A, G protein-coupled                | -0.421 | 4.9E-02          |
| 243007_at    | <i>TTC5</i>     | tetratricopeptide repeat domain 5                                             | -0.421 | 4.9E-02          |
| 238477_at    | <i>KIF1C</i>    | kinesin family member 1C                                                      | -0.422 | 4.9E-02          |
| 223337_at    | <i>CWC27</i>    | CWC27 spliceosome-associated protein homolog (S. cerevisiae)                  | -0.422 | 4.8E-02          |
| 210251_s_at  | <i>RUFY3</i>    | RUN and FYVE domain containing 3                                              | -0.422 | 4.8E-02          |
| 205103_at    | <i>C1orf61</i>  | chromosome 1 open reading frame 61                                            | -0.422 | 4.8E-02          |
| 242303_at    | <i>NRG2</i>     | neuregulin 2                                                                  | -0.422 | 4.8E-02          |
| 212820_at    | <i>DMXL2</i>    | Dmx-like 2                                                                    | -0.422 | 4.8E-02          |
| 225855_at    | <i>EPB41L5</i>  | erythrocyte membrane protein band 4.1 like 5                                  | -0.422 | 4.8E-02          |
| 242006_at    | <i>LCA5</i>     | Leber congenital amaurosis 5                                                  | -0.422 | 4.8E-02          |

| Probeset ID  | Gene symbol      | Gene description                                                                          | $\rho$ | Adjusted<br><i>P</i> -value |
|--------------|------------------|-------------------------------------------------------------------------------------------|--------|-----------------------------|
| 203485_at    | <i>RTN1</i>      | reticulon 1                                                                               | -0.423 | 4.8E-02                     |
| 207100_s_at  | <i>VAMP1</i>     | vesicle-associated membrane protein 1 (synaptobrevin 1)                                   | -0.423 | 4.8E-02                     |
| 210908_s_at  | <i>PFDN5</i>     | prefoldin subunit 5                                                                       | -0.423 | 4.8E-02                     |
| 211819_s_at  | <i>SORBS1</i>    | sorbin and SH3 domain containing 1                                                        | -0.423 | 4.8E-02                     |
| 221908_at    | <i>RNFT2</i>     | ring finger protein, transmembrane 2                                                      | -0.423 | 4.8E-02                     |
| 213825_at    | <i>OLIG2</i>     | oligodendrocyte lineage transcription factor 2                                            | -0.423 | 4.8E-02                     |
| 225820_at    | <i>PHF17</i>     | PHD finger protein 17                                                                     | -0.423 | 4.8E-02                     |
| 229038_at    | <i>CWF19L1</i>   | CWF19-like 1, cell cycle control (S. pombe)                                               | -0.423 | 4.8E-02                     |
| 243417_at    | <i>ZADH2</i>     | zinc binding alcohol dehydrogenase domain containing 2                                    | -0.423 | 4.8E-02                     |
| 201646_at    | <i>SCARB2</i>    | scavenger receptor class B, member 2                                                      | -0.423 | 4.8E-02                     |
| 205903_s_at  | <i>KCNN3</i>     | potassium intermediate/small conductance calcium-activated channel, subfamily N, member 3 | -0.423 | 4.8E-02                     |
| 221656_s_at  | <i>ARHGEF10L</i> | Rho guanine nucleotide exchange factor (GEF) 10-like                                      | -0.423 | 4.8E-02                     |
| 231650_s_at  | <i>SEZ6L</i>     | Seizure related 6 homolog (mouse)-like                                                    | -0.423 | 4.8E-02                     |
| 1558009_at   | <i>SLC1A2</i>    | solute carrier family 1 (glial high affinity glutamate transporter), member 2             | -0.423 | 4.8E-02                     |
| 203537_at    | <i>PRPSAP2</i>   | phosphoribosyl pyrophosphate synthetase-associated protein 2                              | -0.423 | 4.8E-02                     |
| 1558675_s_at | <i>NEMF</i>      | nuclear export mediator factor                                                            | -0.423 | 4.8E-02                     |
| 211033_s_at  | <i>PEX7</i>      | peroxisomal biogenesis factor 7                                                           | -0.423 | 4.8E-02                     |
| 1555154_a_at | <i>QKI</i>       | QKI, KH domain containing, RNA binding                                                    | -0.424 | 4.8E-02                     |
| 219732_at    | <i>LPPR1</i>     | lipid phosphate phosphatase-related protein type 1                                        | -0.424 | 4.8E-02                     |
| 235348_at    | <i>ABHD13</i>    | abhydrolase domain containing 13                                                          | -0.424 | 4.8E-02                     |
| 224616_at    | <i>DYNC1LI2</i>  | dynein, cytoplasmic 1, light intermediate chain 2                                         | -0.424 | 4.8E-02                     |
| 235021_at    | <i>KIAA2026</i>  | KIAA2026                                                                                  | -0.424 | 4.8E-02                     |
| 239442_at    | <i>CEP68</i>     | centrosomal protein 68kDa                                                                 | -0.424 | 4.8E-02                     |
| 218706_s_at  | <i>GRAMD3</i>    | GRAM domain containing 3                                                                  | -0.424 | 4.7E-02                     |
| 228822_s_at  | <i>USP16</i>     | ubiquitin specific peptidase 16                                                           | -0.424 | 4.7E-02                     |
| 208925_at    | <i>CLDND1</i>    | claudin domain containing 1                                                               | -0.424 | 4.7E-02                     |
| 214552_s_at  | <i>RABEP1</i>    | rabaptin, RAB GTPase binding effector protein 1                                           | -0.424 | 4.7E-02                     |
| 225856_at    | <i>CLOCK</i>     | clock homolog (mouse)                                                                     | -0.424 | 4.7E-02                     |
| 201226_at    | <i>NDUFB8</i>    | NADH dehydrogenase (ubiquinone) 1 beta subcomplex, 8, 19kDa                               | -0.424 | 4.7E-02                     |
| 204832_s_at  | <i>BMPRIA</i>    | bone morphogenetic protein receptor, type IA                                              | -0.424 | 4.7E-02                     |
| 227435_at    | <i>KIAA2018</i>  | KIAA2018                                                                                  | -0.424 | 4.7E-02                     |
| 227859_at    | <i>DNAJC27</i>   | DnaJ (Hsp40) homolog, subfamily C, member 27                                              | -0.424 | 4.7E-02                     |
| 203087_s_at  | <i>KIF2A</i>     | kinesin heavy chain member 2A                                                             | -0.424 | 4.7E-02                     |
| 209684_at    | <i>RIN2</i>      | Ras and Rab interactor 2                                                                  | -0.424 | 4.7E-02                     |
| 209987_s_at  | <i>ASCL1</i>     | achaete-scute complex homolog 1 (Drosophila)                                              | -0.424 | 4.7E-02                     |
| 213848_at    | <i>DUSP7</i>     | dual specificity phosphatase 7                                                            | -0.424 | 4.7E-02                     |
| 224769_at    | <i>TAOK1</i>     | TAO kinase 1                                                                              | -0.424 | 4.7E-02                     |
| 238441_at    | <i>PRKAA2</i>    | protein kinase, AMP-activated, alpha 2 catalytic subunit                                  | -0.425 | 4.7E-02                     |
| 215233_at    | <i>JMJD6</i>     | jumonji domain containing 6                                                               | -0.425 | 4.7E-02                     |
| 221490_at    | <i>UBAPI</i>     | ubiquitin associated protein 1                                                            | -0.425 | 4.7E-02                     |
| 212230_at    | <i>PPAP2B</i>    | phosphatidic acid phosphatase type 2B                                                     | -0.425 | 4.7E-02                     |
| 223446_s_at  | <i>DTNBP1</i>    | dystrobrevin binding protein 1                                                            | -0.425 | 4.7E-02                     |
| 227808_at    | <i>DNAJC15</i>   | DnaJ (Hsp40) homolog, subfamily C, member 15                                              | -0.425 | 4.7E-02                     |
| 208920_at    | <i>SRI</i>       | sorcin                                                                                    | -0.425 | 4.7E-02                     |
| 225379_at    | <i>MAPT</i>      | microtubule-associated protein tau                                                        | -0.425 | 4.7E-02                     |

| Probeset ID | Gene symbol     | Gene description                                                                                  | $\rho$ | Adjusted P-value |
|-------------|-----------------|---------------------------------------------------------------------------------------------------|--------|------------------|
| 231103_at   | <i>KCNN3</i>    | potassium intermediate/small conductance calcium-activated channel, subfamily N, member 3         | -0.425 | 4.7E-02          |
| 202045_s_at | <i>ARHGAP35</i> | Rho GTPase activating protein 35                                                                  | -0.426 | 4.6E-02          |
| 218946_at   | <i>NFU1</i>     | NFU1 iron-sulfur cluster scaffold homolog ( <i>S. cerevisiae</i> )                                | -0.426 | 4.6E-02          |
| 208870_x_at | <i>ATP5C1</i>   | ATP synthase, H <sup>+</sup> transporting, mitochondrial F1 complex, gamma polypeptide 1          | -0.426 | 4.6E-02          |
| 239897_at   | <i>BCLAF1</i>   | BCL2-associated transcription factor 1                                                            | -0.426 | 4.6E-02          |
| 206085_s_at | <i>CTH</i>      | cystathionase (cystathionine gamma-lyase)                                                         | -0.426 | 4.6E-02          |
| 226230_at   | <i>SMEK2</i>    | SMEK homolog 2, suppressor of mek1 ( <i>Dictyostelium</i> )                                       | -0.426 | 4.6E-02          |
| 203972_s_at | <i>PEX3</i>     | peroxisomal biogenesis factor 3                                                                   | -0.426 | 4.6E-02          |
| 212894_at   | <i>SUPV3L1</i>  | suppressor of var1, 3-like 1 ( <i>S. cerevisiae</i> )                                             | -0.426 | 4.6E-02          |
| 224931_at   | <i>SLC41A3</i>  | solute carrier family 41, member 3                                                                | -0.426 | 4.6E-02          |
| 226277_at   | <i>COL4A3BP</i> | collagen, type IV, alpha 3 (Goodpasture antigen) binding protein                                  | -0.426 | 4.6E-02          |
| 55692_at    | <i>ELMO2</i>    | engulfment and cell motility 2                                                                    | -0.426 | 4.6E-02          |
| 201158_at   | <i>NMT1</i>     | N-myristoyltransferase 1                                                                          | -0.426 | 4.6E-02          |
| 225475_at   | <i>MIER1</i>    | mesoderm induction early response 1 homolog ( <i>Xenopus laevis</i> )                             | -0.426 | 4.6E-02          |
| 210202_s_at | <i>BINI</i>     | bridging integrator 1                                                                             | -0.427 | 4.6E-02          |
| 209610_s_at | <i>SLC1A4</i>   | solute carrier family 1 (glutamate/neutral amino acid transporter), member 4                      | -0.427 | 4.6E-02          |
| 210600_s_at | <i>GRK4</i>     | G protein-coupled receptor kinase 4                                                               | -0.427 | 4.6E-02          |
| 223213_s_at | <i>ZHX1</i>     | zinc fingers and homeoboxes 1                                                                     | -0.427 | 4.6E-02          |
| 212669_at   | <i>CAMK2G</i>   | calcium/calmodulin-dependent protein kinase II gamma                                              | -0.427 | 4.6E-02          |
| 203298_s_at | <i>JARID2</i>   | jumonji, AT rich interactive domain 2                                                             | -0.427 | 4.6E-02          |
| 210222_s_at | <i>RTN1</i>     | reticulum 1                                                                                       | -0.427 | 4.6E-02          |
| 242443_at   | <i>EML5</i>     | Echinoderm microtubule associated protein like 5                                                  | -0.427 | 4.6E-02          |
| 203377_s_at | <i>CDC40</i>    | cell division cycle 40 homolog ( <i>S. cerevisiae</i> )                                           | -0.427 | 4.5E-02          |
| 228817_at   | <i>ALG9</i>     | asparagine-linked glycosylation 9, alpha-1,2-mannosyltransferase homolog ( <i>S. cerevisiae</i> ) | -0.427 | 4.5E-02          |
| 1568777_at  | <i>EML5</i>     | echinoderm microtubule associated protein like 5                                                  | -0.427 | 4.5E-02          |
| 203266_s_at | <i>MAP2K4</i>   | mitogen-activated protein kinase kinase 4                                                         | -0.427 | 4.5E-02          |
| 241966_at   | <i>MYO5A</i>    | myosin VA (heavy chain 12, myosin)                                                                | -0.427 | 4.5E-02          |
| 223230_at   | <i>PRPF38A</i>  | PRP38 pre-mRNA processing factor 38 (yeast) domain containing A                                   | -0.427 | 4.5E-02          |
| 230183_at   | <i>EXT1</i>     | exostosin 1                                                                                       | -0.427 | 4.5E-02          |
| 207785_s_at | <i>RBPJ</i>     | recombination signal binding protein for immunoglobulin kappa J region                            | -0.427 | 4.5E-02          |
| 200694_s_at | <i>DDX24</i>    | DEAD (Asp-Glu-Ala-Asp) box polypeptide 24                                                         | -0.428 | 4.5E-02          |
| 208398_s_at | <i>TBPL1</i>    | TBP-like 1                                                                                        | -0.428 | 4.5E-02          |
| 209683_at   | <i>FAM49A</i>   | family with sequence similarity 49, member A                                                      | -0.428 | 4.5E-02          |
| 212672_at   | <i>ATM</i>      | ataxia telangiectasia mutated                                                                     | -0.428 | 4.5E-02          |
| 57588_at    | <i>SLC24A3</i>  | solute carrier family 24 (sodium/potassium/calcium exchanger), member 3                           | -0.428 | 4.5E-02          |
| 209075_s_at | <i>ISCU</i>     | iron-sulfur cluster scaffold homolog ( <i>E. coli</i> )                                           | -0.428 | 4.5E-02          |
| 209724_s_at | <i>ZFP161</i>   | zinc finger protein 161 homolog (mouse)                                                           | -0.428 | 4.5E-02          |
| 225041_at   | <i>MPHOSPH8</i> | M-phase phosphoprotein 8                                                                          | -0.428 | 4.5E-02          |
| 233555_s_at | <i>SULF2</i>    | sulfatase 2                                                                                       | -0.428 | 4.5E-02          |
| 232166_at   | <i>KIAA1377</i> | KIAA1377                                                                                          | -0.428 | 4.5E-02          |
| 217033_x_at | <i>NTRK3</i>    | neurotrophic tyrosine kinase, receptor, type 3                                                    | -0.429 | 4.5E-02          |

| Probeset ID  | Gene symbol         | Gene description                                                                 | $\rho$ | Adjusted P-value |
|--------------|---------------------|----------------------------------------------------------------------------------|--------|------------------|
| 228214_at    | <i>SOX6</i>         | SRY (sex determining region Y)-box 6                                             | -0.429 | 4.5E-02          |
| 208070_s_at  | <i>REV3L</i>        | REV3-like, polymerase (DNA directed), zeta, catalytic subunit                    | -0.429 | 4.5E-02          |
| 227111_at    | <i>ZBTB34</i>       | zinc finger and BTB domain containing 34                                         | -0.429 | 4.5E-02          |
| 1566257_at   | <i>GPR180</i>       | G protein-coupled receptor 180                                                   | -0.429 | 4.4E-02          |
| 220596_at    | <i>GPATCH4</i>      | G patch domain containing 4                                                      | -0.429 | 4.4E-02          |
| 201986_at    | <i>MED13</i>        | mediator complex subunit 13                                                      | -0.429 | 4.4E-02          |
| 210738_s_at  | <i>SLC4A4</i>       | solute carrier family 4, sodium bicarbonate cotransporter, member 4              | -0.429 | 4.4E-02          |
| 222447_at    | <i>METTL9</i>       | methyltransferase like 9                                                         | -0.429 | 4.4E-02          |
| 209798_at    | <i>NPAT</i>         | nuclear protein, ataxia-telangiectasia locus                                     | -0.429 | 4.4E-02          |
| 204716_at    | <i>CCDC6</i>        | coiled-coil domain containing 6                                                  | -0.429 | 4.4E-02          |
| 236126_at    | <i>ACVR2B</i>       | activin A receptor, type IIB                                                     | -0.429 | 4.4E-02          |
| 240236_at    | <i>STXBP5L</i>      | syntaxin binding protein 5-like                                                  | -0.429 | 4.4E-02          |
| 221104_s_at  | <i>NIPSNAP3B</i>    | nipsnap homolog 3B ( <i>C. elegans</i> )                                         | -0.430 | 4.4E-02          |
| 221311_x_at  | <i>LYRM2</i>        | LYR motif containing 2                                                           | -0.430 | 4.4E-02          |
| 224728_at    | <i>ATPAF1</i>       | ATP synthase mitochondrial F1 complex assembly factor 1                          | -0.430 | 4.4E-02          |
| 227064_at    | <i>ANKRD40</i>      | ankyrin repeat domain 40                                                         | -0.430 | 4.4E-02          |
| 204226_at    | <i>STAU2</i>        | staufer, RNA binding protein, homolog 2 ( <i>Drosophila</i> )                    | -0.430 | 4.4E-02          |
| 1552752_a_at | <i>CADM2</i>        | cell adhesion molecule 2                                                         | -0.430 | 4.4E-02          |
| 205050_s_at  | <i>MAPK8IP2</i>     | mitogen-activated protein kinase 8 interacting protein 2                         | -0.430 | 4.4E-02          |
| 240106_at    | <i>GNPTAB</i>       | N-acetylglucosamine-1-phosphate transferase, alpha and beta subunits             | -0.430 | 4.4E-02          |
| 219093_at    | <i>PIDI</i>         | phosphotyrosine interaction domain containing 1                                  | -0.430 | 4.4E-02          |
| 204303_s_at  | <i>CTIF</i>         | CBP80/20-dependent translation initiation factor                                 | -0.430 | 4.3E-02          |
| 205846_at    | <i>PTPRB</i>        | protein tyrosine phosphatase, receptor type, B                                   | -0.430 | 4.3E-02          |
| 213993_at    | <i>SPON1</i>        | spondin 1, extracellular matrix protein                                          | -0.431 | 4.3E-02          |
| 204824_at    | <i>ENDOG</i>        | endonuclease G                                                                   | -0.431 | 4.3E-02          |
| 210053_at    | <i>TAF5</i>         | TAF5 RNA polymerase II, TATA box binding protein (TBP)-associated factor, 100kDa | -0.431 | 4.3E-02          |
| 201490_s_at  | <i>PPIF</i>         | peptidylprolyl isomerase F                                                       | -0.431 | 4.3E-02          |
| 235331_x_at  | <i>PCGF5</i>        | polycomb group ring finger 5                                                     | -0.431 | 4.3E-02          |
| 217821_s_at  | <i>WBP11</i>        | WW domain binding protein 11                                                     | -0.431 | 4.3E-02          |
| 218304_s_at  | <i>OSBPL11</i>      | oxysterol binding protein-like 11                                                | -0.431 | 4.3E-02          |
| 218428_s_at  | <i>REV1</i>         | REV1, polymerase (DNA directed)                                                  | -0.431 | 4.3E-02          |
| 212607_at    | <i>AKT3</i>         | v-akt murine thymoma viral oncogene homolog 3 (protein kinase B, gamma)          | -0.431 | 4.3E-02          |
| 230869_at    | <i>FAM155A</i>      | family with sequence similarity 155, member A                                    | -0.431 | 4.3E-02          |
| 1558075_at   | <i>LOC399491</i>    | GPS, PLAT and transmembrane domain-containing protein                            | -0.431 | 4.3E-02          |
| 226095_s_at  | <i>ATXNIL</i>       | ataxin 1-like                                                                    | -0.431 | 4.3E-02          |
| 242088_at    | <i>KLHL24</i>       | kelch-like 24 ( <i>Drosophila</i> )                                              | -0.431 | 4.3E-02          |
| 226918_at    | <i>JPH4</i>         | junctophilin 4                                                                   | -0.432 | 4.3E-02          |
| 243735_at    | <i>ELP2</i>         | elongation protein 2 homolog ( <i>S. cerevisiae</i> )                            | -0.432 | 4.3E-02          |
| 225698_at    | <i>EPB41L4A-AS1</i> | EPB41L4A antisense RNA 1 (non-protein coding)                                    | -0.432 | 4.3E-02          |
| 226842_at    | <i>FBXL20</i>       | F-box and leucine-rich repeat protein 20                                         | -0.432 | 4.3E-02          |
| 223227_at    | <i>BBS2</i>         | Bardet-Biedl syndrome 2                                                          | -0.432 | 4.3E-02          |
| 228291_s_at  | <i>PLK1S1</i>       | polo-like kinase 1 substrate 1                                                   | -0.432 | 4.3E-02          |
| 201214_s_at  | <i>PPP1R7</i>       | protein phosphatase 1, regulatory subunit 7                                      | -0.432 | 4.3E-02          |

| Probeset ID  | Gene symbol      | Gene description                                                                          | $\rho$ | Adjusted P-value |
|--------------|------------------|-------------------------------------------------------------------------------------------|--------|------------------|
| 209005_at    | <i>FBXL5</i>     | F-box and leucine-rich repeat protein 5                                                   | -0.432 | 4.3E-02          |
| 235018_at    | <i>CSRNP3</i>    | cysteine-serine-rich nuclear protein 3                                                    | -0.432 | 4.3E-02          |
| 235626_at    | <i>CAMK1D</i>    | calcium/calmodulin-dependent protein kinase ID                                            | -0.432 | 4.3E-02          |
| 209142_s_at  | <i>UBE2G1</i>    | ubiquitin-conjugating enzyme E2G 1                                                        | -0.432 | 4.2E-02          |
| 219421_at    | <i>TTC33</i>     | tetratricopeptide repeat domain 33                                                        | -0.432 | 4.2E-02          |
| 232382_s_at  | <i>PCMTD1</i>    | protein-L-isoaspartate (D-aspartate) O-methyltransferase domain containing 1              | -0.432 | 4.2E-02          |
| 225175_s_at  | <i>SLC44A2</i>   | solute carrier family 44, member 2                                                        | -0.432 | 4.2E-02          |
| 226198_at    | <i>TOMIL2</i>    | target of myb1-like 2 (chicken)                                                           | -0.432 | 4.2E-02          |
| 216037_x_at  | <i>TCF7L2</i>    | transcription factor 7-like 2 (T-cell specific, HMG-box)                                  | -0.432 | 4.2E-02          |
| 227340_s_at  | <i>RGMB</i>      | RGM domain family, member B                                                               | -0.433 | 4.2E-02          |
| 215707_s_at  | <i>PRNP</i>      | prion protein                                                                             | -0.433 | 4.2E-02          |
| 1554424_at   | <i>FIP1L1</i>    | FIP1 like 1 ( <i>S. cerevisiae</i> )                                                      | -0.433 | 4.2E-02          |
| 229428_at    | <i>TIMM23</i>    | translocase of inner mitochondrial membrane 23 homolog (yeast)                            | -0.433 | 4.2E-02          |
| 212835_at    | <i>FAM175B</i>   | family with sequence similarity 175, member B                                             | -0.433 | 4.2E-02          |
| 225603_s_at  | <i>TRIQQ</i>     | triple QxxK/R motif containing                                                            | -0.434 | 4.2E-02          |
| 1554486_a_at | <i>GFOD1</i>     | glucose-fructose oxidoreductase domain containing 1                                       | -0.434 | 4.2E-02          |
| 202429_s_at  | <i>PPP3CA</i>    | protein phosphatase 3, catalytic subunit, alpha isozyme                                   | -0.434 | 4.2E-02          |
| 203463_s_at  | <i>EPN2</i>      | epsin 2                                                                                   | -0.434 | 4.2E-02          |
| 214118_x_at  | <i>PCMI</i>      | pericentriolar material 1                                                                 | -0.434 | 4.2E-02          |
| 230288_at    | <i>FGF14</i>     | fibroblast growth factor 14                                                               | -0.434 | 4.1E-02          |
| 213480_at    | <i>VAMP4</i>     | vesicle-associated membrane protein 4                                                     | -0.434 | 4.1E-02          |
| 218491_s_at  | <i>THYN1</i>     | thymocyte nuclear protein 1                                                               | -0.434 | 4.1E-02          |
| 227657_at    | <i>RNF150</i>    | ring finger protein 150                                                                   | -0.434 | 4.1E-02          |
| 231959_at    | <i>LIN52</i>     | lin-52 homolog ( <i>C. elegans</i> )                                                      | -0.434 | 4.1E-02          |
| 218135_at    | <i>ERGIC2</i>    | ERGIC and golgi 2                                                                         | -0.435 | 4.1E-02          |
| 225678_at    | <i>POLR3H</i>    | polymerase (RNA) III (DNA directed) polypeptide H (22.9kD)                                | -0.435 | 4.1E-02          |
| 227422_at    | <i>STRN</i>      | striatin, calmodulin binding protein                                                      | -0.435 | 4.1E-02          |
| 232244_at    | <i>KIAA1161</i>  | KIAA1161                                                                                  | -0.435 | 4.1E-02          |
| 201992_s_at  | <i>KIF5B</i>     | kinesin family member 5B                                                                  | -0.435 | 4.1E-02          |
| 231810_at    | <i>BRI3BP</i>    | BRI3 binding protein                                                                      | -0.435 | 4.1E-02          |
| 231969_at    | <i>STOX2</i>     | storkhead box 2                                                                           | -0.435 | 4.1E-02          |
| 203635_at    | <i>DSCR3</i>     | Down syndrome critical region gene 3                                                      | -0.435 | 4.1E-02          |
| 235918_x_at  | <i>CEP97</i>     | centrosomal protein 97kDa                                                                 | -0.435 | 4.1E-02          |
| 241372_at    | <i>ZC3H6</i>     | zinc finger CCCH-type containing 6                                                        | -0.435 | 4.1E-02          |
| 223595_at    | <i>TMEM133</i>   | transmembrane protein 133                                                                 | -0.435 | 4.1E-02          |
| 226046_at    | <i>MAPK8</i>     | mitogen-activated protein kinase 8                                                        | -0.435 | 4.1E-02          |
| 209558_s_at  | <i>HIP1R</i>     | huntingtin interacting protein 1 related                                                  | -0.435 | 4.1E-02          |
| 215201_at    | <i>REPS1</i>     | RALBP1 associated Eps domain containing 1                                                 | -0.435 | 4.1E-02          |
| 230078_at    | <i>RAPGEF6</i>   | Rap guanine nucleotide exchange factor (GEF) 6                                            | -0.435 | 4.1E-02          |
| 243507_s_at  | <i>C20orf196</i> | chromosome 20 open reading frame 196                                                      | -0.435 | 4.1E-02          |
| 206992_s_at  | <i>ATP5S</i>     | ATP synthase, H <sup>+</sup> transporting, mitochondrial Fo complex, subunit s (factor B) | -0.436 | 4.1E-02          |
| 212771_at    | <i>FAM171A1</i>  | family with sequence similarity 171, member A1                                            | -0.436 | 4.1E-02          |
| 217973_at    | <i>DCXR</i>      | dicarbonyl/L-xylulose reductase                                                           | -0.436 | 4.1E-02          |
| 203544_s_at  | <i>STAM</i>      | signal transducing adaptor molecule (SH3 domain and ITAM motif) 1                         | -0.436 | 4.1E-02          |

| Probeset ID  | Gene symbol      | Gene description                                                                                           | $\rho$ | Adjusted P-value |
|--------------|------------------|------------------------------------------------------------------------------------------------------------|--------|------------------|
| 205712_at    | <i>PTPRD</i>     | protein tyrosine phosphatase, receptor type, D                                                             | -0.436 | 4.0E-02          |
| 223661_at    | <i>NUCKS1</i>    | Nuclear casein kinase and cyclin-dependent kinase substrate 1                                              | -0.436 | 4.0E-02          |
| 224281_s_at  | <i>NGRN</i>      | neugrin, neurite outgrowth associated                                                                      | -0.436 | 4.0E-02          |
| 200816_s_at  | <i>PAFAH1B1</i>  | platelet-activating factor acetylhydrolase 1b, regulatory subunit 1 (45kDa)                                | -0.436 | 4.0E-02          |
| 208667_s_at  | <i>STI3</i>      | suppression of tumorigenicity 13 (colon carcinoma) (Hsp70 interacting protein)                             | -0.436 | 4.0E-02          |
| 227701_at    | <i>C10orf118</i> | chromosome 10 open reading frame 118                                                                       | -0.436 | 4.0E-02          |
| 1553227_s_at | <i>BRWD1</i>     | bromodomain and WD repeat domain containing 1                                                              | -0.436 | 4.0E-02          |
| 203075_at    | <i>SMAD2</i>     | SMAD family member 2                                                                                       | -0.436 | 4.0E-02          |
| 228122_at    | <i>CCDC66</i>    | coiled-coil domain containing 66                                                                           | -0.436 | 4.0E-02          |
| 235672_at    | <i>MAP6</i>      | microtubule-associated protein 6                                                                           | -0.436 | 4.0E-02          |
| 205022_s_at  | <i>FOXN3</i>     | forkhead box N3                                                                                            | -0.436 | 4.0E-02          |
| 202167_s_at  | <i>MMS19</i>     | MMS19 nucleotide excision repair homolog (S. cerevisiae)                                                   | -0.436 | 4.0E-02          |
| 207308_at    | <i>SLCO1A2</i>   | solute carrier organic anion transporter family, member 1A2                                                | -0.436 | 4.0E-02          |
| 212114_at    | <i>ATXN7L3B</i>  | ataxin 7-like 3B                                                                                           | -0.437 | 4.0E-02          |
| 228196_s_at  | <i>LARP4B</i>    | La ribonucleoprotein domain family, member 4B                                                              | -0.437 | 4.0E-02          |
| 213805_at    | <i>ABHD5</i>     | abhydrolase domain containing 5                                                                            | -0.437 | 4.0E-02          |
| 225409_at    | <i>COA5</i>      | cytochrome C oxidase assembly factor 5                                                                     | -0.437 | 4.0E-02          |
| 201164_s_at  | <i>PUM1</i>      | pumilio homolog 1 (Drosophila)                                                                             | -0.437 | 4.0E-02          |
| 206179_s_at  | <i>TPPP</i>      | tubulin polymerization promoting protein                                                                   | -0.437 | 4.0E-02          |
| 214590_s_at  | <i>UBE2D1</i>    | ubiquitin-conjugating enzyme E2D 1                                                                         | -0.437 | 4.0E-02          |
| 225031_at    | <i>CHD6</i>      | chromodomain helicase DNA binding protein 6                                                                | -0.437 | 4.0E-02          |
| 219077_s_at  | <i>WWOX</i>      | WW domain containing oxidoreductase                                                                        | -0.437 | 4.0E-02          |
| 238585_at    | <i>GTDC1</i>     | glycosyltransferase-like domain containing 1                                                               | -0.437 | 4.0E-02          |
| 202986_at    | <i>ARNT2</i>     | aryl-hydrocarbon receptor nuclear translocator 2                                                           | -0.437 | 4.0E-02          |
| 223912_s_at  | <i>CLN8</i>      | ceroid-lipofuscinosis, neuronal 8 (epilepsy, progressive with mental retardation)                          | -0.437 | 4.0E-02          |
| 213106_at    | <i>ATP8A1</i>    | ATPase, aminophospholipid transporter (APLT), class I, type 8A, member 1                                   | -0.437 | 4.0E-02          |
| 229679_at    | <i>C12orf76</i>  | chromosome 12 open reading frame 76                                                                        | -0.437 | 4.0E-02          |
| 203080_s_at  | <i>BAZ2B</i>     | bromodomain adjacent to zinc finger domain, 2B                                                             | -0.437 | 4.0E-02          |
| 209323_at    | <i>PRKRIR</i>    | protein-kinase, interferon-inducible double stranded RNA dependent inhibitor, repressor of (P58 repressor) | -0.437 | 4.0E-02          |
| 242586_at    | <i>FSD1L</i>     | fibronectin type III and SPRY domain containing 1-like                                                     | -0.438 | 4.0E-02          |
| 206308_at    | <i>TRDMT1</i>    | tRNA aspartic acid methyltransferase 1                                                                     | -0.438 | 4.0E-02          |
| 211081_s_at  | <i>MAP4K5</i>    | mitogen-activated protein kinase kinase kinase kinase 5                                                    | -0.438 | 4.0E-02          |
| 225018_at    | <i>SPIRE1</i>    | spire homolog 1 (Drosophila)                                                                               | -0.438 | 4.0E-02          |
| 225192_at    | <i>CACUL1</i>    | CDK2-associated, cullin domain 1                                                                           | -0.438 | 4.0E-02          |
| 204091_at    | <i>PDE6D</i>     | phosphodiesterase 6D, cGMP-specific, rod, delta                                                            | -0.438 | 4.0E-02          |
| 222469_s_at  | <i>TOLLIP</i>    | toll interacting protein                                                                                   | -0.438 | 4.0E-02          |
| 208714_at    | <i>NDUFV1</i>    | NADH dehydrogenase (ubiquinone) flavoprotein 1, 51kDa                                                      | -0.438 | 4.0E-02          |
| 39582_at     | <i>CYLD</i>      | cylindromatosis (turban tumor syndrome)                                                                    | -0.438 | 4.0E-02          |
| 237515_at    | <i>TMEM56</i>    | transmembrane protein 56                                                                                   | -0.438 | 3.9E-02          |
| 210835_s_at  | <i>CTBP2</i>     | C-terminal binding protein 2                                                                               | -0.438 | 3.9E-02          |
| 230933_at    | <i>DSTN</i>      | Destrin (actin depolymerizing factor)                                                                      | -0.438 | 3.9E-02          |

| Probeset ID  | Gene symbol     | Gene description                                                           | $\rho$ | Adjusted P-value |
|--------------|-----------------|----------------------------------------------------------------------------|--------|------------------|
| 204019_s_at  | <i>SH3YL1</i>   | SH3 domain containing, Ysc84-like 1 ( <i>S. cerevisiae</i> )               | -0.439 | 3.9E-02          |
| 226649_at    | <i>PANK1</i>    | pantothenate kinase 1                                                      | -0.439 | 3.9E-02          |
| 209497_s_at  | <i>RBM4B</i>    | RNA binding motif protein 4B                                               | -0.439 | 3.9E-02          |
| 222460_s_at  | <i>FAM192A</i>  | family with sequence similarity 192, member A                              | -0.439 | 3.9E-02          |
| 232038_at    | <i>C6orf170</i> | chromosome 6 open reading frame 170                                        | -0.439 | 3.9E-02          |
| 232020_at    | <i>SMURF2</i>   | SMAD specific E3 ubiquitin protein ligase 2                                | -0.439 | 3.9E-02          |
| 222434_at    | <i>ENAH</i>     | enabled homolog ( <i>Drosophila</i> )                                      | -0.439 | 3.9E-02          |
| 203304_at    | <i>BAMBI</i>    | BMP and activin membrane-bound inhibitor homolog ( <i>Xenopus laevis</i> ) | -0.439 | 3.9E-02          |
| 225045_at    | <i>CCDC88A</i>  | coiled-coil domain containing 88A                                          | -0.439 | 3.9E-02          |
| 227498_at    | <i>SOX6</i>     | SRY (sex determining region Y)-box 6                                       | -0.439 | 3.9E-02          |
| 227608_at    | <i>DAP3</i>     | death associated protein 3                                                 | -0.439 | 3.9E-02          |
| 228266_s_at  | <i>HDGFRP3</i>  | hepatoma-derived growth factor, related protein 3                          | -0.439 | 3.9E-02          |
| 201719_s_at  | <i>EPB41L2</i>  | erythrocyte membrane protein band 4.1-like 2                               | -0.439 | 3.9E-02          |
| 203494_s_at  | <i>CEP57</i>    | centrosomal protein 57kDa                                                  | -0.439 | 3.9E-02          |
| 218841_at    | <i>ASB8</i>     | ankyrin repeat and SOCS box containing 8                                   | -0.439 | 3.9E-02          |
| 219889_at    | <i>FRAT1</i>    | frequently rearranged in advanced T-cell lymphomas                         | -0.440 | 3.8E-02          |
| 203553_s_at  | <i>MAP4K5</i>   | mitogen-activated protein kinase kinase kinase kinase 5                    | -0.440 | 3.8E-02          |
| 213199_at    | <i>C2CD3</i>    | C2 calcium-dependent domain containing 3                                   | -0.440 | 3.8E-02          |
| 200832_s_at  | <i>SCD</i>      | stearoyl-CoA desaturase (delta-9-desaturase)                               | -0.440 | 3.8E-02          |
| 213049_at    | <i>RALGAP1</i>  | Ral GTPase activating protein, alpha subunit 1 (catalytic)                 | -0.440 | 3.8E-02          |
| 217952_x_at  | <i>PHF3</i>     | PHD finger protein 3                                                       | -0.440 | 3.8E-02          |
| 218111_s_at  | <i>CMAS</i>     | cytidine monophosphate N-acetylneuraminic acid synthetase                  | -0.440 | 3.8E-02          |
| 220321_s_at  | <i>CCDC121</i>  | coiled-coil domain containing 121                                          | -0.440 | 3.8E-02          |
| 201235_s_at  | <i>BTG2</i>     | BTG family, member 2                                                       | -0.440 | 3.8E-02          |
| 204009_s_at  | <i>KRAS</i>     | v-Ki-ras2 Kirsten rat sarcoma viral oncogene homolog                       | -0.441 | 3.8E-02          |
| 33494_at     | <i>ETFDH</i>    | electron-transferring-flavoprotein dehydrogenase                           | -0.441 | 3.8E-02          |
| 204434_at    | <i>SPATA2</i>   | spermatogenesis associated 2                                               | -0.441 | 3.8E-02          |
| 223437_at    | <i>PPARA</i>    | peroxisome proliferator-activated receptor alpha                           | -0.441 | 3.8E-02          |
| 219799_s_at  | <i>DHRS9</i>    | dehydrogenase/reductase (SDR family) member 9                              | -0.441 | 3.8E-02          |
| 227261_at    | <i>KLF12</i>    | Kruppel-like factor 12                                                     | -0.441 | 3.8E-02          |
| 233985_x_at  | <i>PPP1R9A</i>  | protein phosphatase 1, regulatory subunit 9A                               | -0.441 | 3.8E-02          |
| 230276_at    | <i>FAM49A</i>   | family with sequence similarity 49, member A                               | -0.441 | 3.8E-02          |
| 1554807_a_at | <i>SPIRE1</i>   | spire homolog 1 ( <i>Drosophila</i> )                                      | -0.441 | 3.8E-02          |
| 226312_at    | <i>RICTOR</i>   | RPTOR independent companion of MTOR, complex 2                             | -0.441 | 3.8E-02          |
| 218137_s_at  | <i>SMAP1</i>    | small ArfGAP 1                                                             | -0.441 | 3.8E-02          |
| 208731_at    | <i>RAB2A</i>    | RAB2A, member RAS oncogene family                                          | -0.441 | 3.8E-02          |
| 208733_at    | <i>RAB2A</i>    | RAB2A, member RAS oncogene family                                          | -0.441 | 3.8E-02          |
| 1554470_s_at | <i>ZBTB44</i>   | zinc finger and BTB domain containing 44                                   | -0.442 | 3.7E-02          |
| 240859_at    | <i>ZFYVE16</i>  | zinc finger, FYVE domain containing 16                                     | -0.442 | 3.7E-02          |
| 230759_at    | <i>SNX14</i>    | Sorting nexin 14                                                           | -0.442 | 3.7E-02          |
| 201348_at    | <i>GPX3</i>     | glutathione peroxidase 3 (plasma)                                          | -0.442 | 3.7E-02          |
| 220277_at    | <i>CXXC4</i>    | CXXC finger protein 4                                                      | -0.442 | 3.7E-02          |
| 226484_at    | <i>ZBTB47</i>   | zinc finger and BTB domain containing 47                                   | -0.443 | 3.7E-02          |
| 241701_at    | <i>ARHGAP21</i> | Rho GTPase activating protein 21                                           | -0.443 | 3.7E-02          |
| 226269_at    | <i>GDAP1</i>    | ganglioside induced differentiation associated protein 1                   | -0.443 | 3.7E-02          |
| 218386_x_at  | <i>USP16</i>    | ubiquitin specific peptidase 16                                            | -0.443 | 3.7E-02          |
| 206374_at    | <i>DUSP8</i>    | dual specificity phosphatase 8                                             | -0.443 | 3.6E-02          |

| Probeset ID  | Gene symbol     | Gene description                                                                               | $\rho$ | Adjusted P-value |
|--------------|-----------------|------------------------------------------------------------------------------------------------|--------|------------------|
| 212829_at    | <i>PIP4K2A</i>  | phosphatidylinositol-5-phosphate 4-kinase, type II, alpha                                      | -0.443 | 3.6E-02          |
| 210136_at    | <i>MBP</i>      | myelin basic protein                                                                           | -0.444 | 3.6E-02          |
| 213355_at    | <i>ST3GAL6</i>  | ST3 beta-galactoside alpha-2,3-sialyltransferase 6                                             | -0.444 | 3.6E-02          |
| 217895_at    | <i>PTCD3</i>    | pentatricopeptide repeat domain 3                                                              | -0.444 | 3.6E-02          |
| 218087_s_at  | <i>SORBS1</i>   | sorbin and SH3 domain containing 1                                                             | -0.444 | 3.6E-02          |
| 219671_at    | <i>HPCAL4</i>   | hippocalcin like 4                                                                             | -0.444 | 3.6E-02          |
| 241809_at    | <i>FAM212B</i>  | family with sequence similarity 212, member B                                                  | -0.444 | 3.6E-02          |
| 203598_s_at  | <i>WBP4</i>     | WW domain binding protein 4 (formin binding protein 21)                                        | -0.444 | 3.6E-02          |
| 219341_at    | <i>CLN8</i>     | ceroid-lipofuscinosis, neuronal 8 (epilepsy, progressive with mental retardation)              | -0.444 | 3.6E-02          |
| 221519_at    | <i>FBXW4</i>    | F-box and WD repeat domain containing 4                                                        | -0.444 | 3.6E-02          |
| 224782_at    | <i>ZMAT2</i>    | zinc finger, matrin-type 2                                                                     | -0.444 | 3.6E-02          |
| 227037_at    | <i>PLD6</i>     | phospholipase D family, member 6                                                               | -0.444 | 3.6E-02          |
| 231567_s_at  | <i>CCDC62</i>   | coiled-coil domain containing 62                                                               | -0.444 | 3.6E-02          |
| 206462_s_at  | <i>NTRK3</i>    | neurotrophic tyrosine kinase, receptor, type 3                                                 | -0.444 | 3.6E-02          |
| 202521_at    | <i>CTCF</i>     | CCCTC-binding factor (zinc finger protein)                                                     | -0.444 | 3.6E-02          |
| 217936_at    | <i>ARHGAP5</i>  | Rho GTPase activating protein 5                                                                | -0.444 | 3.6E-02          |
| 218877_s_at  | <i>TRMT11</i>   | tRNA methyltransferase 11 homolog (S. cerevisiae)                                              | -0.444 | 3.6E-02          |
| 227637_at    | <i>TFCP2</i>    | transcription factor CP2                                                                       | -0.444 | 3.6E-02          |
| 235694_at    | <i>TCFL5</i>    | transcription factor-like 5 (basic helix-loop-helix)                                           | -0.444 | 3.6E-02          |
| 200597_at    | <i>EIF3A</i>    | eukaryotic translation initiation factor 3, subunit A                                          | -0.444 | 3.6E-02          |
| 218824_at    | <i>PNMAL1</i>   | paraneoplastic Ma antigen family-like 1                                                        | -0.445 | 3.6E-02          |
| 209452_s_at  | <i>VTI1B</i>    | vesicle transport through interaction with t-SNAREs homolog 1B (yeast)                         | -0.445 | 3.6E-02          |
| 213960_at    | <i>NTRK3</i>    | neurotrophic tyrosine kinase, receptor, type 3                                                 | -0.445 | 3.6E-02          |
| 1552627_a_at | <i>ARHGAP5</i>  | Rho GTPase activating protein 5                                                                | -0.445 | 3.6E-02          |
| 205730_s_at  | <i>ABLIM3</i>   | actin binding LIM protein family, member 3                                                     | -0.445 | 3.6E-02          |
| 202260_s_at  | <i>STXBP1</i>   | syntaxin binding protein 1                                                                     | -0.445 | 3.6E-02          |
| 224784_at    | <i>MLLT6</i>    | myeloid/lymphoid or mixed-lineage leukemia (trithorax homolog, Drosophila); translocated to, 6 | -0.445 | 3.6E-02          |
| 218603_at    | <i>HECA</i>     | headcase homolog (Drosophila)                                                                  | -0.445 | 3.6E-02          |
| 202187_s_at  | <i>PPP2R5A</i>  | protein phosphatase 2, regulatory subunit B', alpha                                            | -0.445 | 3.6E-02          |
| 212830_at    | <i>MEGF9</i>    | multiple EGF-like-domains 9                                                                    | -0.445 | 3.6E-02          |
| 202544_at    | <i>GMFB</i>     | glia maturation factor, beta                                                                   | -0.445 | 3.6E-02          |
| 213407_at    | <i>PHLPP2</i>   | PH domain and leucine rich repeat protein phosphatase 2                                        | -0.446 | 3.5E-02          |
| 228329_at    | <i>DAB1</i>     | disabled homolog 1 (Drosophila)                                                                | -0.446 | 3.5E-02          |
| 214585_s_at  | <i>VPS52</i>    | vacuolar protein sorting 52 homolog (S. cerevisiae)                                            | -0.446 | 3.5E-02          |
| 216100_s_at  | <i>TOR1AIP1</i> | torsin A interacting protein 1                                                                 | -0.446 | 3.5E-02          |
| 203790_s_at  | <i>HRSP12</i>   | heat-responsive protein 12                                                                     | -0.446 | 3.5E-02          |
| 227000_at    | <i>C7orf41</i>  | chromosome 7 open reading frame 41                                                             | -0.446 | 3.5E-02          |
| 201799_s_at  | <i>OSBP</i>     | oxysterol binding protein                                                                      | -0.446 | 3.5E-02          |
| 203364_s_at  | <i>ATG13</i>    | autophagy related 13                                                                           | -0.446 | 3.5E-02          |
| 213236_at    | <i>SASH1</i>    | SAM and SH3 domain containing 1                                                                | -0.446 | 3.5E-02          |
| 217969_at    | <i>C11orf2</i>  | chromosome 11 open reading frame 2                                                             | -0.446 | 3.5E-02          |
| 200596_s_at  | <i>EIF3A</i>    | eukaryotic translation initiation factor 3, subunit A                                          | -0.446 | 3.5E-02          |
| 226398_s_at  | <i>FRA10AC1</i> | fragile site, folic acid type, rare, fra(10)(q23.3) or fra(10)(q24.2) candidate 1              | -0.446 | 3.5E-02          |
| 202770_s_at  | <i>CCNG2</i>    | cyclin G2                                                                                      | -0.446 | 3.5E-02          |



| Probeset ID  | Gene symbol     | Gene description                                                                                                       | $\rho$ | Adjusted P-value |
|--------------|-----------------|------------------------------------------------------------------------------------------------------------------------|--------|------------------|
| 225629_s_at  | <i>ZBTB4</i>    | zinc finger and BTB domain containing 4                                                                                | -0.446 | 3.5E-02          |
| 202359_s_at  | <i>SNX19</i>    | sorting nexin 19                                                                                                       | -0.447 | 3.5E-02          |
| 218874_s_at  | <i>ATAT1</i>    | alpha tubulin acetyltransferase 1                                                                                      | -0.447 | 3.5E-02          |
| 206506_s_at  | <i>SUPT3H</i>   | suppressor of Ty 3 homolog (S. cerevisiae)                                                                             | -0.447 | 3.5E-02          |
| 205651_x_at  | <i>RAPGEF4</i>  | Rap guanine nucleotide exchange factor (GEF) 4                                                                         | -0.447 | 3.5E-02          |
| 209018_s_at  | <i>PINK1</i>    | PTEN induced putative kinase 1                                                                                         | -0.447 | 3.5E-02          |
| 204151_x_at  | <i>AKR1C1</i>   | aldo-keto reductase family 1, member C1 (dihydrodiol dehydrogenase 1; 20-alpha (3-alpha)-hydroxysteroid dehydrogenase) | -0.447 | 3.5E-02          |
| 226339_at    | <i>TRUB1</i>    | TruB pseudouridine (psi) synthase homolog 1 (E. coli)                                                                  | -0.447 | 3.5E-02          |
| 1556696_s_at | <i>FLJ42709</i> | uncharacterized LOC441094                                                                                              | -0.447 | 3.5E-02          |
| 244011_at    | <i>PPMIK</i>    | protein phosphatase, Mg2+/Mn2+ dependent, 1K                                                                           | -0.447 | 3.5E-02          |
| 207152_at    | <i>NTRK2</i>    | neurotrophic tyrosine kinase, receptor, type 2                                                                         | -0.447 | 3.5E-02          |
| 222405_at    | <i>PTPLAD1</i>  | protein tyrosine phosphatase-like A domain containing 1                                                                | -0.448 | 3.5E-02          |
| 203628_at    | <i>IGF1R</i>    | insulin-like growth factor 1 receptor                                                                                  | -0.448 | 3.4E-02          |
| 228512_at    | <i>PTCD3</i>    | pentatricopeptide repeat domain 3                                                                                      | -0.448 | 3.4E-02          |
| 244194_at    | <i>ADAM22</i>   | ADAM metallopeptidase domain 22                                                                                        | -0.448 | 3.4E-02          |
| 218862_at    | <i>ASB13</i>    | ankyrin repeat and SOCS box containing 13                                                                              | -0.448 | 3.4E-02          |
| 213278_at    | <i>MTMR9</i>    | myotubularin related protein 9                                                                                         | -0.448 | 3.4E-02          |
| 217644_s_at  | <i>SOS2</i>     | son of sevenless homolog 2 (Drosophila)                                                                                | -0.448 | 3.4E-02          |
| 226572_at    | <i>SOCS7</i>    | suppressor of cytokine signaling 7                                                                                     | -0.448 | 3.4E-02          |
| 218185_s_at  | <i>ARMC1</i>    | armadillo repeat containing 1                                                                                          | -0.448 | 3.4E-02          |
| 208656_s_at  | <i>CCNI</i>     | cyclin I                                                                                                               | -0.449 | 3.4E-02          |
| 218394_at    | <i>ROGDI</i>    | rogdi homolog (Drosophila)                                                                                             | -0.449 | 3.4E-02          |
| 213377_x_at  | <i>RPS12</i>    | ribosomal protein S12                                                                                                  | -0.449 | 3.4E-02          |
| 227497_at    | <i>SOX6</i>     | SRY (sex determining region Y)-box 6                                                                                   | -0.449 | 3.4E-02          |
| 227624_at    | <i>TET2</i>     | tet methylcytosine dioxygenase 2                                                                                       | -0.449 | 3.4E-02          |
| 242418_at    | <i>C2orf27A</i> | chromosome 2 open reading frame 27A                                                                                    | -0.449 | 3.4E-02          |
| 204672_s_at  | <i>ANKRD6</i>   | ankyrin repeat domain 6                                                                                                | -0.449 | 3.4E-02          |
| 225049_at    | <i>BLOC1S2</i>  | biogenesis of lysosomal organelles complex-1, subunit 2                                                                | -0.449 | 3.4E-02          |
| 222794_x_at  | <i>MTPAP</i>    | mitochondrial poly(A) polymerase                                                                                       | -0.449 | 3.4E-02          |
| 213626_at    | <i>CBR4</i>     | carbonyl reductase 4                                                                                                   | -0.449 | 3.4E-02          |
| 229970_at    | <i>KBTD7</i>    | kelch repeat and BTB (POZ) domain containing 7                                                                         | -0.450 | 3.4E-02          |
| 244687_at    | <i>DBT</i>      | dihydrolipoamide branched chain transacylase E2                                                                        | -0.450 | 3.3E-02          |
| 212339_at    | <i>EPB41L1</i>  | erythrocyte membrane protein band 4.1-like 1                                                                           | -0.450 | 3.3E-02          |
| 243176_at    | <i>ARL5A</i>    | ADP-ribosylation factor-like 5A                                                                                        | -0.450 | 3.3E-02          |
| 211761_s_at  | <i>CACYBP</i>   | calyculin binding protein                                                                                              | -0.450 | 3.3E-02          |
| 224564_s_at  | <i>RTN3</i>     | reticulon 3                                                                                                            | -0.450 | 3.3E-02          |
| 226487_at    | <i>FAM222A</i>  | family with sequence similarity 222, member A                                                                          | -0.450 | 3.3E-02          |
| 219067_s_at  | <i>NSMCE4A</i>  | non-SMC element 4 homolog A (S. cerevisiae)                                                                            | -0.450 | 3.3E-02          |
| 205818_at    | <i>DBC1</i>     | deleted in bladder cancer 1                                                                                            | -0.450 | 3.3E-02          |
| 226169_at    | <i>SBF2</i>     | SET binding factor 2                                                                                                   | -0.451 | 3.3E-02          |
| 206158_s_at  | <i>CNBP</i>     | CCHC-type zinc finger, nucleic acid binding protein                                                                    | -0.451 | 3.3E-02          |
| 221788_at    | <i>PGM3</i>     | phosphoglucomutase 3                                                                                                   | -0.451 | 3.3E-02          |
| 227370_at    | <i>FAM171B</i>  | family with sequence similarity 171, member B                                                                          | -0.451 | 3.3E-02          |
| 203428_s_at  | <i>ASF1A</i>    | ASF1 anti-silencing function 1 homolog A (S. cerevisiae)                                                               | -0.451 | 3.3E-02          |
| 226139_at    | <i>CCDC149</i>  | coiled-coil domain containing 149                                                                                      | -0.452 | 3.2E-02          |
| 225623_at    | <i>KIAA1737</i> | KIAA1737                                                                                                               | -0.452 | 3.2E-02          |
| 221547_at    | <i>PRPF18</i>   | PRP18 pre-mRNA processing factor 18 homolog (S.                                                                        | -0.452 | 3.2E-02          |

| Probeset ID  | Gene symbol    | Gene description                                                                        | $\rho$ | Adjusted P-value |
|--------------|----------------|-----------------------------------------------------------------------------------------|--------|------------------|
| 200662_s_at  | <i>TOMM20</i>  | cerevisiae)<br>translocase of outer mitochondrial membrane 20 homolog (yeast)           | -0.452 | 3.2E-02          |
| 212153_at    | <i>POGZ</i>    | pogo transposable element with ZNF domain                                               | -0.452 | 3.2E-02          |
| 218281_at    | <i>MRPL48</i>  | mitochondrial ribosomal protein L48                                                     | -0.452 | 3.2E-02          |
| 225477_s_at  | <i>NR2C2</i>   | nuclear receptor subfamily 2, group C, member 2                                         | -0.452 | 3.2E-02          |
| 204512_at    | <i>HIVEP1</i>  | human immunodeficiency virus type I enhancer binding protein 1                          | -0.452 | 3.2E-02          |
| 209988_s_at  | <i>ASCL1</i>   | achaete-scute complex homolog 1 (Drosophila)                                            | -0.452 | 3.2E-02          |
| 202363_at    | <i>SPOCK1</i>  | sparc/osteonectin, cwcv and kazal-like domains proteoglycan (testican) 1                | -0.452 | 3.2E-02          |
| 212970_at    | <i>APBB2</i>   | amyloid beta (A4) precursor protein-binding, family B, member 2                         | -0.453 | 3.2E-02          |
| 224605_at    | <i>C4orf3</i>  | chromosome 4 open reading frame 3                                                       | -0.453 | 3.2E-02          |
| 227440_at    | <i>ANKS1B</i>  | ankyrin repeat and sterile alpha motif domain containing 1B                             | -0.453 | 3.2E-02          |
| 204823_at    | <i>NAV3</i>    | neuron navigator 3                                                                      | -0.453 | 3.2E-02          |
| 204671_s_at  | <i>ANKRD6</i>  | ankyrin repeat domain 6                                                                 | -0.453 | 3.1E-02          |
| 223799_at    | <i>MSANTD4</i> | Myb/SANT-like DNA-binding domain containing 4 with coiled-coils                         | -0.453 | 3.1E-02          |
| 201959_s_at  | <i>MYCBP2</i>  | MYC binding protein 2, E3 ubiquitin protein ligase                                      | -0.454 | 3.1E-02          |
| 214091_s_at  | <i>GPX3</i>    | glutathione peroxidase 3 (plasma)                                                       | -0.454 | 3.1E-02          |
| 229743_at    | <i>ZNF438</i>  | zinc finger protein 438                                                                 | -0.454 | 3.1E-02          |
| 217777_s_at  | <i>PTPLAD1</i> | protein tyrosine phosphatase-like A domain containing 1                                 | -0.454 | 3.1E-02          |
| 221792_at    | <i>RAB6B</i>   | RAB6B, member RAS oncogene family                                                       | -0.454 | 3.1E-02          |
| 228457_at    | <i>PPM1L</i>   | protein phosphatase, Mg <sup>2+</sup> /Mn <sup>2+</sup> dependent, 1L                   | -0.454 | 3.1E-02          |
| 238550_at    | <i>RUFY2</i>   | RUN and FYVE domain containing 2                                                        | -0.454 | 3.1E-02          |
| 204120_s_at  | <i>ADK</i>     | adenosine kinase                                                                        | -0.454 | 3.1E-02          |
| 220282_at    | <i>RIC3</i>    | resistance to inhibitors of cholinesterase 3 homolog (C. elegans)                       | -0.454 | 3.1E-02          |
| 226425_at    | <i>CLIP4</i>   | CAP-GLY domain containing linker protein family, member 4                               | -0.454 | 3.1E-02          |
| 201381_x_at  | <i>CACYBP</i>  | calyculin binding protein                                                               | -0.454 | 3.1E-02          |
| 206241_at    | <i>KPNA5</i>   | karyopherin alpha 5 (importin alpha 6)                                                  | -0.454 | 3.1E-02          |
| 207108_s_at  | <i>NIPBL</i>   | Nipped-B homolog (Drosophila)                                                           | -0.454 | 3.1E-02          |
| 210896_s_at  | <i>ASPH</i>    | aspartate beta-hydroxylase                                                              | -0.454 | 3.1E-02          |
| 220028_at    | <i>ACVR2B</i>  | activin A receptor, type IIB                                                            | -0.454 | 3.1E-02          |
| 208635_x_at  | <i>NACA</i>    | nascent polypeptide-associated complex alpha subunit                                    | -0.454 | 3.1E-02          |
| 218523_at    | <i>LHPP</i>    | phospholysine phosphohistidine inorganic pyrophosphate phosphatase                      | -0.454 | 3.1E-02          |
| 227531_at    | <i>CLOCK</i>   | clock homolog (mouse)                                                                   | -0.454 | 3.1E-02          |
| 209148_at    | <i>RXRβ</i>    | retinoid X receptor, beta                                                               | -0.455 | 3.1E-02          |
| 1552754_a_at | <i>CADM2</i>   | cell adhesion molecule 2                                                                | -0.455 | 3.1E-02          |
| 209160_at    | <i>AKR1C3</i>  | aldo-keto reductase family 1, member C3 (3-alpha hydroxysteroid dehydrogenase, type II) | -0.455 | 3.1E-02          |
| 241682_at    | <i>KLHL23</i>  | kelch-like 23 (Drosophila)                                                              | -0.455 | 3.1E-02          |
| 201051_at    | <i>ANP32A</i>  | acidic (leucine-rich) nuclear phosphoprotein 32 family, member A                        | -0.455 | 3.1E-02          |
| 219137_s_at  | <i>MFF</i>     | mitochondrial fission factor                                                            | -0.455 | 3.1E-02          |
| 209735_at    | <i>ABCG2</i>   | ATP-binding cassette, sub-family G (WHITE), member 2                                    | -0.455 | 3.1E-02          |
| 200612_s_at  | <i>AP2B1</i>   | adaptor-related protein complex 2, beta 1 subunit                                       | -0.455 | 3.1E-02          |

| Probeset ID  | Gene symbol     | Gene description                                                                        | $\rho$ | Adjusted P-value |
|--------------|-----------------|-----------------------------------------------------------------------------------------|--------|------------------|
| 201220_x_at  | <i>CTBP2</i>    | C-terminal binding protein 2                                                            | -0.455 | 3.1E-02          |
| 226641_at    | <i>ANKRD44</i>  | ankyrin repeat domain 44                                                                | -0.455 | 3.1E-02          |
| 204238_s_at  | <i>C6orf108</i> | chromosome 6 open reading frame 108                                                     | -0.456 | 3.1E-02          |
| 238923_at    | <i>SPOP</i>     | speckle-type POZ protein                                                                | -0.456 | 3.1E-02          |
| 224883_at    | <i>PLDN</i>     | pallidin homolog (mouse)                                                                | -0.456 | 3.0E-02          |
| 235472_at    | <i>FUT10</i>    | fucosyltransferase 10 (alpha (1,3) fucosyltransferase)                                  | -0.456 | 3.0E-02          |
| 223350_x_at  | <i>LIN7C</i>    | lin-7 homolog C (C. elegans)                                                            | -0.456 | 3.0E-02          |
| 226399_at    | <i>DNAJB14</i>  | DnaJ (Hsp40) homolog, subfamily B, member 14                                            | -0.456 | 3.0E-02          |
| 225339_at    | <i>SPAG9</i>    | sperm associated antigen 9                                                              | -0.456 | 3.0E-02          |
| 225218_at    | <i>ZFYVE27</i>  | zinc finger, FYVE domain containing 27                                                  | -0.457 | 3.0E-02          |
| 227119_at    | <i>CNOT6L</i>   | CCR4-NOT transcription complex, subunit 6-like                                          | -0.457 | 3.0E-02          |
| 201915_at    | <i>SEC63</i>    | SEC63 homolog (S. cerevisiae)                                                           | -0.457 | 3.0E-02          |
| 201960_s_at  | <i>MYCBP2</i>   | MYC binding protein 2, E3 ubiquitin protein ligase                                      | -0.457 | 3.0E-02          |
| 231175_at    | <i>BEND6</i>    | BEN domain containing 6                                                                 | -0.457 | 3.0E-02          |
| 212774_at    | <i>ZNF238</i>   | zinc finger protein 238                                                                 | -0.457 | 3.0E-02          |
| 227178_at    | <i>CELF2</i>    | CUGBP, Elav-like family member 2                                                        | -0.457 | 3.0E-02          |
| 212357_at    | <i>FAM168A</i>  | family with sequence similarity 168, member A                                           | -0.457 | 3.0E-02          |
| 223263_s_at  | <i>FGFR1OP2</i> | FGFR1 oncogene partner 2                                                                | -0.457 | 3.0E-02          |
| 238521_at    | <i>FGF12</i>    | fibroblast growth factor 12                                                             | -0.457 | 3.0E-02          |
| 1555268_a_at | <i>GRID1</i>    | glutamate receptor, ionotropic, delta 1                                                 | -0.457 | 3.0E-02          |
| 218631_at    | <i>AVPII</i>    | arginine vasopressin-induced 1                                                          | -0.457 | 3.0E-02          |
| 203223_at    | <i>RABEP1</i>   | rabaptin, RAB GTPase binding effector protein 1                                         | -0.457 | 3.0E-02          |
| 218158_s_at  | <i>APPL1</i>    | adaptor protein, phosphotyrosine interaction, PH domain and leucine zipper containing 1 | -0.457 | 3.0E-02          |
| 225198_at    | <i>VAPA</i>     | VAMP (vesicle-associated membrane protein)-associated protein A, 33kDa                  | -0.458 | 3.0E-02          |
| 203241_at    | <i>UVRAG</i>    | UV radiation resistance associated gene                                                 | -0.458 | 3.0E-02          |
| 202326_at    | <i>EHMT2</i>    | euchromatic histone-lysine N-methyltransferase 2                                        | -0.458 | 3.0E-02          |
| 210121_at    | <i>B3GALT2</i>  | UDP-Gal:betaGlcNAc beta 1,3-galactosyltransferase, polypeptide 2                        | -0.458 | 3.0E-02          |
| 213439_x_at  | <i>RUNDC3A</i>  | RUN domain containing 3A                                                                | -0.458 | 3.0E-02          |
| 235415_at    | <i>RPRD2</i>    | regulation of nuclear pre-mRNA domain containing 2                                      | -0.458 | 3.0E-02          |
| 227559_at    | <i>NDUFAF4</i>  | NADH dehydrogenase (ubiquinone) complex I, assembly factor 4                            | -0.458 | 3.0E-02          |
| 202923_s_at  | <i>GCLC</i>     | glutamate-cysteine ligase, catalytic subunit                                            | -0.458 | 2.9E-02          |
| 244227_at    | <i>SYT6</i>     | synaptotagmin VI                                                                        | -0.458 | 2.9E-02          |
| 201996_s_at  | <i>SPEN</i>     | spen homolog, transcriptional regulator (Drosophila)                                    | -0.459 | 2.9E-02          |
| 203930_s_at  | <i>MAPT</i>     | microtubule-associated protein tau                                                      | -0.459 | 2.9E-02          |
| 206045_s_at  | <i>NOL4</i>     | nucleolar protein 4                                                                     | -0.459 | 2.9E-02          |
| 221589_s_at  | <i>ALDH6A1</i>  | aldehyde dehydrogenase 6 family, member A1                                              | -0.459 | 2.9E-02          |
| 239223_s_at  | <i>FBXL20</i>   | F-box and leucine-rich repeat protein 20                                                | -0.459 | 2.9E-02          |
| 204546_at    | <i>KIAA0513</i> | KIAA0513                                                                                | -0.459 | 2.9E-02          |
| 205849_s_at  | <i>UQCRCB</i>   | ubiquinol-cytochrome c reductase binding protein                                        | -0.459 | 2.9E-02          |
| 226439_s_at  | <i>NBEA</i>     | neurobeachin                                                                            | -0.459 | 2.9E-02          |
| 230141_at    | <i>ARID4A</i>   | AT rich interactive domain 4A (RBP1-like)                                               | -0.459 | 2.9E-02          |
| 214434_at    | <i>HSPA12A</i>  | heat shock 70kDa protein 12A                                                            | -0.459 | 2.9E-02          |
| 217196_s_at  | <i>CAMSAP2</i>  | calmodulin regulated spectrin-associated protein family, member 2                       | -0.459 | 2.9E-02          |
| 201535_at    | <i>UBL3</i>     | ubiquitin-like 3                                                                        | -0.459 | 2.9E-02          |

| Probeset ID  | Gene symbol      | Gene description                                                                        | $\rho$ | Adjusted P-value |
|--------------|------------------|-----------------------------------------------------------------------------------------|--------|------------------|
| 209274_s_at  | <i>ISCA1</i>     | iron-sulfur cluster assembly 1 homolog (S. cerevisiae)                                  | -0.459 | 2.9E-02          |
| 209106_at    | <i>NCOA1</i>     | nuclear receptor coactivator 1                                                          | -0.460 | 2.9E-02          |
| 222880_at    | <i>AKT3</i>      | v-akt murine thymoma viral oncogene homolog 3 (protein kinase B, gamma)                 | -0.460 | 2.9E-02          |
| 225830_at    | <i>PDZD8</i>     | PDZ domain containing 8                                                                 | -0.460 | 2.9E-02          |
| 201036_s_at  | <i>HADH</i>      | hydroxyacyl-CoA dehydrogenase                                                           | -0.460 | 2.9E-02          |
| 224458_at    | <i>TMEM246</i>   | transmembrane protein 246                                                               | -0.460 | 2.9E-02          |
| 209272_at    | <i>NAB1</i>      | NGFI-A binding protein 1 (EGR1 binding protein 1)                                       | -0.460 | 2.9E-02          |
| 1552658_a_at | <i>NAV3</i>      | neuron navigator 3                                                                      | -0.460 | 2.9E-02          |
| 221820_s_at  | <i>KAT8</i>      | K(lysine) acetyltransferase 8                                                           | -0.460 | 2.9E-02          |
| 238476_at    | <i>CREBRF</i>    | CREB3 regulatory factor                                                                 | -0.460 | 2.9E-02          |
| 200721_s_at  | <i>ACTR1A</i>    | ARP1 actin-related protein 1 homolog A, cencentractin alpha (yeast)                     | -0.460 | 2.9E-02          |
| 228793_at    | <i>JMJD1C</i>    | jumonji domain containing 1C                                                            | -0.460 | 2.9E-02          |
| 201962_s_at  | <i>RNF41</i>     | ring finger protein 41                                                                  | -0.460 | 2.9E-02          |
| 210695_s_at  | <i>WWOX</i>      | WW domain containing oxidoreductase                                                     | -0.460 | 2.9E-02          |
| 219036_at    | <i>CEP70</i>     | centrosomal protein 70kDa                                                               | -0.460 | 2.9E-02          |
| 222538_s_at  | <i>APPL1</i>     | adaptor protein, phosphotyrosine interaction, PH domain and leucine zipper containing 1 | -0.460 | 2.9E-02          |
| 244133_at    | <i>USP49</i>     | ubiquitin specific peptidase 49                                                         | -0.461 | 2.9E-02          |
| 221495_s_at  | <i>TCF25</i>     | transcription factor 25 (basic helix-loop-helix)                                        | -0.461 | 2.9E-02          |
| 205005_s_at  | <i>NMT2</i>      | N-myristoyltransferase 2                                                                | -0.461 | 2.8E-02          |
| 212450_at    | <i>SECISBP2L</i> | SECIS binding protein 2-like                                                            | -0.461 | 2.8E-02          |
| 218224_at    | <i>PNMA1</i>     | paraneoplastic Ma antigen 1                                                             | -0.461 | 2.8E-02          |
| 220595_at    | <i>PDZRN4</i>    | PDZ domain containing ring finger 4                                                     | -0.461 | 2.8E-02          |
| 222824_at    | <i>NUDT5</i>     | nudix (nucleoside diphosphate linked moiety X)-type motif 5                             | -0.461 | 2.8E-02          |
| 205171_at    | <i>PTPN4</i>     | protein tyrosine phosphatase, non-receptor type 4 (megakaryocyte)                       | -0.461 | 2.8E-02          |
| 213689_x_at  | <i>FAM69A</i>    | family with sequence similarity 69, member A                                            | -0.461 | 2.8E-02          |
| 201989_s_at  | <i>CREBL2</i>    | cAMP responsive element binding protein-like 2                                          | -0.461 | 2.8E-02          |
| 208166_at    | <i>MMP16</i>     | matrix metalloproteinase 16 (membrane-inserted)                                         | -0.461 | 2.8E-02          |
| 224772_at    | <i>NAV1</i>      | neuron navigator 1                                                                      | -0.461 | 2.8E-02          |
| 225092_at    | <i>RABEP1</i>    | rabaptin, RAB GTPase binding effector protein 1                                         | -0.461 | 2.8E-02          |
| 1555544_a_at | <i>CADM2</i>     | cell adhesion molecule 2                                                                | -0.461 | 2.8E-02          |
| 206385_s_at  | <i>ANK3</i>      | ankyrin 3, node of Ranvier (ankyrin G)                                                  | -0.461 | 2.8E-02          |
| 219728_at    | <i>MYOT</i>      | myotilin                                                                                | -0.462 | 2.8E-02          |
| 230027_s_at  | <i>MRPL43</i>    | mitochondrial ribosomal protein L43                                                     | -0.462 | 2.8E-02          |
| 230002_at    | <i>GPSM2</i>     | G-protein signaling modulator 2                                                         | -0.462 | 2.8E-02          |
| 203482_at    | <i>FAM178A</i>   | family with sequence similarity 178, member A                                           | -0.462 | 2.8E-02          |
| 222476_at    | <i>CNOT6</i>     | CCR4-NOT transcription complex, subunit 6                                               | -0.462 | 2.8E-02          |
| 228771_at    | <i>ADRBK2</i>    | adrenergic, beta, receptor kinase 2                                                     | -0.462 | 2.8E-02          |
| 201976_s_at  | <i>MYO10</i>     | myosin X                                                                                | -0.462 | 2.8E-02          |
| 225976_at    | <i>BTF3L4</i>    | basic transcription factor 3-like 4                                                     | -0.462 | 2.8E-02          |
| 226822_at    | <i>STOX2</i>     | storkhead box 2                                                                         | -0.462 | 2.8E-02          |
| 212358_at    | <i>CLIP3</i>     | CAP-GLY domain containing linker protein 3                                              | -0.463 | 2.7E-02          |
| 201772_at    | <i>AZIN1</i>     | antizyme inhibitor 1                                                                    | -0.463 | 2.7E-02          |
| 242098_at    | <i>KIAA1244</i>  | KIAA1244                                                                                | -0.463 | 2.7E-02          |
| 200795_at    | <i>SPARCL1</i>   | SPARC-like 1 (hevin)                                                                    | -0.463 | 2.7E-02          |

| Probeset ID  | Gene symbol     | Gene description                                                                                                       | $\rho$ | Adjusted P-value |
|--------------|-----------------|------------------------------------------------------------------------------------------------------------------------|--------|------------------|
| 206818_s_at  | <i>CNNM2</i>    | cyclin M2                                                                                                              | -0.463 | 2.7E-02          |
| 228414_at    | <i>KCNMA1</i>   | potassium large conductance calcium-activated channel, subfamily M, alpha member 1                                     | -0.463 | 2.7E-02          |
| 213331_s_at  | <i>NEK1</i>     | NIMA (never in mitosis gene a)-related kinase 1                                                                        | -0.464 | 2.7E-02          |
| 229848_at    | <i>ZNF10</i>    | zinc finger protein 10                                                                                                 | -0.464 | 2.7E-02          |
| 202981_x_at  | <i>SIAH1</i>    | siah E3 ubiquitin protein ligase 1                                                                                     | -0.464 | 2.7E-02          |
| 239726_at    | <i>ANK3</i>     | ankyrin 3, node of Ranvier (ankyrin G)                                                                                 | -0.464 | 2.7E-02          |
| 221483_s_at  | <i>ARPP19</i>   | cAMP-regulated phosphoprotein, 19kDa                                                                                   | -0.464 | 2.7E-02          |
| 230320_at    | <i>TBRG1</i>    | transforming growth factor beta regulator 1                                                                            | -0.464 | 2.7E-02          |
| 202289_s_at  | <i>TACC2</i>    | transforming, acidic coiled-coil containing protein 2                                                                  | -0.464 | 2.7E-02          |
| 205751_at    | <i>SH3GL2</i>   | SH3-domain GRB2-like 2                                                                                                 | -0.464 | 2.7E-02          |
| 227996_at    | <i>FARP1</i>    | FERM, RhoGEF (ARHGEF) and pleckstrin domain protein 1 (chondrocyte-derived)                                            | -0.464 | 2.7E-02          |
| 224561_s_at  | <i>MORF4L1</i>  | mortality factor 4 like 1                                                                                              | -0.464 | 2.7E-02          |
| 230178_s_at  | <i>ELP2</i>     | elongation protein 2 homolog (S. cerevisiae)                                                                           | -0.464 | 2.7E-02          |
| 218297_at    | <i>FAM188A</i>  | family with sequence similarity 188, member A                                                                          | -0.465 | 2.7E-02          |
| 226056_at    | <i>ARHGAP31</i> | Rho GTPase activating protein 31                                                                                       | -0.465 | 2.7E-02          |
| 209442_x_at  | <i>ANK3</i>     | ankyrin 3, node of Ranvier (ankyrin G)                                                                                 | -0.465 | 2.7E-02          |
| 218031_s_at  | <i>FOXN3</i>    | forkhead box N3                                                                                                        | -0.465 | 2.7E-02          |
| 229145_at    | <i>ANAPC16</i>  | anaphase promoting complex subunit 16                                                                                  | -0.465 | 2.7E-02          |
| 204287_at    | <i>SYNGR1</i>   | synaptogyrin 1                                                                                                         | -0.465 | 2.7E-02          |
| 201383_s_at  | <i>NBR1</i>     | neighbor of BRCA1 gene 1                                                                                               | -0.465 | 2.6E-02          |
| 58308_at     | <i>TRIM62</i>   | tripartite motif containing 62                                                                                         | -0.465 | 2.6E-02          |
| 212901_s_at  | <i>CSTF2T</i>   | cleavage stimulation factor, 3' pre-RNA, subunit 2, 64kDa, tau variant                                                 | -0.465 | 2.6E-02          |
| 216594_x_at  | <i>AKR1C1</i>   | aldo-keto reductase family 1, member C1 (dihydrodiol dehydrogenase 1; 20-alpha (3-alpha)-hydroxysteroid dehydrogenase) | -0.466 | 2.6E-02          |
| 225420_at    | <i>GPAM</i>     | glycerol-3-phosphate acyltransferase, mitochondrial                                                                    | -0.466 | 2.6E-02          |
| 1554544_a_at | <i>MBP</i>      | myelin basic protein                                                                                                   | -0.466 | 2.6E-02          |
| 208883_at    | <i>UBR5</i>     | ubiquitin protein ligase E3 component n-recogin 5                                                                      | -0.466 | 2.6E-02          |
| 218583_s_at  | <i>DCUN1D1</i>  | DCN1, defective in cullin neddylation 1, domain containing 1 (S. cerevisiae)                                           | -0.466 | 2.6E-02          |
| 227113_at    | <i>ADHFE1</i>   | alcohol dehydrogenase, iron containing, 1                                                                              | -0.466 | 2.6E-02          |
| 233498_at    | <i>ERBB4</i>    | v-erb-a erythroblastic leukemia viral oncogene homolog 4 (avian)                                                       | -0.466 | 2.6E-02          |
| 226181_at    | <i>TUBE1</i>    | tubulin, epsilon 1                                                                                                     | -0.466 | 2.6E-02          |
| 201366_at    | <i>ANXA7</i>    | annexin A7                                                                                                             | -0.466 | 2.6E-02          |
| 201776_s_at  | <i>KIAA0494</i> | KIAA0494                                                                                                               | -0.466 | 2.6E-02          |
| 222696_at    | <i>AXIN2</i>    | axin 2                                                                                                                 | -0.467 | 2.6E-02          |
| 1553974_at   | <i>C22orf39</i> | chromosome 22 open reading frame 39                                                                                    | -0.467 | 2.6E-02          |
| 209117_at    | <i>WBP2</i>     | WW domain binding protein 2                                                                                            | -0.467 | 2.6E-02          |
| 205732_s_at  | <i>NCOA2</i>    | nuclear receptor coactivator 2                                                                                         | -0.467 | 2.6E-02          |
| 213197_at    | <i>ASTN1</i>    | astrotactin 1                                                                                                          | -0.467 | 2.6E-02          |
| 218519_at    | <i>SLC35A5</i>  | solute carrier family 35, member A5                                                                                    | -0.467 | 2.6E-02          |
| 215436_at    | <i>HSDL2</i>    | Hydroxysteroid dehydrogenase like 2                                                                                    | -0.467 | 2.6E-02          |
| 218177_at    | <i>CHMP1B</i>   | charged multivesicular body protein 1B                                                                                 | -0.467 | 2.6E-02          |
| 218026_at    | <i>CCDC56</i>   | coiled-coil domain containing 56                                                                                       | -0.467 | 2.6E-02          |
| 221795_at    | <i>NTRK2</i>    | neurotrophic tyrosine kinase, receptor, type 2                                                                         | -0.467 | 2.6E-02          |
| 222148_s_at  | <i>RHOT1</i>    | ras homolog family member T1                                                                                           | -0.468 | 2.6E-02          |

| Probeset ID  | Gene symbol     | Gene description                                                            | $\rho$ | Adjusted P-value |
|--------------|-----------------|-----------------------------------------------------------------------------|--------|------------------|
| 216511_s_at  | <i>TCF7L2</i>   | transcription factor 7-like 2 (T-cell specific, HMG-box)                    | -0.468 | 2.5E-02          |
| 227679_at    | <i>HDAC11</i>   | histone deacetylase 11                                                      | -0.468 | 2.5E-02          |
| 38340_at     | <i>HIP1R</i>    | huntingtin interacting protein 1 related                                    | -0.468 | 2.5E-02          |
| 234988_at    | <i>VCPIP1</i>   | valosin containing protein (p97)/p47 complex interacting protein 1          | -0.468 | 2.5E-02          |
| 228174_at    | <i>SCAI</i>     | suppressor of cancer cell invasion                                          | -0.468 | 2.5E-02          |
| 227441_s_at  | <i>ANKS1B</i>   | ankyrin repeat and sterile alpha motif domain containing 1B                 | -0.468 | 2.5E-02          |
| 217954_s_at  | <i>PHF3</i>     | PHD finger protein 3                                                        | -0.468 | 2.5E-02          |
| 222576_s_at  | <i>EIF2C1</i>   | eukaryotic translation initiation factor 2C, 1                              | -0.469 | 2.5E-02          |
| 229053_at    | <i>SYT17</i>    | synaptotagmin XVII                                                          | -0.469 | 2.5E-02          |
| 231869_at    | <i>KIAA1586</i> | KIAA1586                                                                    | -0.469 | 2.5E-02          |
| 213913_s_at  | <i>TBC1D30</i>  | TBC1 domain family, member 30                                               | -0.469 | 2.5E-02          |
| 212758_s_at  | <i>ZEB1</i>     | zinc finger E-box binding homeobox 1                                        | -0.469 | 2.5E-02          |
| 226913_s_at  | <i>SOX8</i>     | SRY (sex determining region Y)-box 8                                        | -0.469 | 2.5E-02          |
| 227373_at    | <i>ATXN1L</i>   | ataxin 1-like                                                               | -0.469 | 2.5E-02          |
| 203260_at    | <i>HDDC2</i>    | HD domain containing 2                                                      | -0.469 | 2.5E-02          |
| 227516_at    | <i>SF3A1</i>    | splicing factor 3a, subunit 1, 120kDa                                       | -0.469 | 2.5E-02          |
| 1555246_a_at | <i>SCN1A</i>    | sodium channel, voltage-gated, type I, alpha subunit                        | -0.470 | 2.5E-02          |
| 200813_s_at  | <i>PAFAH1B1</i> | platelet-activating factor acetylhydrolase 1b, regulatory subunit 1 (45kDa) | -0.470 | 2.5E-02          |
| 205139_s_at  | <i>UST</i>      | uronyl-2-sulfotransferase                                                   | -0.470 | 2.5E-02          |
| 204720_s_at  | <i>DNAJC6</i>   | DnaJ (Hsp40) homolog, subfamily C, member 6                                 | -0.470 | 2.5E-02          |
| 226711_at    | <i>FOXN2</i>    | forkhead box N2                                                             | -0.470 | 2.5E-02          |
| 224861_at    | <i>GNAQ</i>     | guanine nucleotide binding protein (G protein), q polypeptide               | -0.471 | 2.4E-02          |
| 203595_s_at  | <i>IFIT5</i>    | interferon-induced protein with tetratricopeptide repeats 5                 | -0.471 | 2.4E-02          |
| 212755_at    | <i>MON2</i>     | MON2 homolog (S. cerevisiae)                                                | -0.471 | 2.4E-02          |
| 223098_s_at  | <i>LONP2</i>    | lon peptidase 2, peroxisomal                                                | -0.471 | 2.4E-02          |
| 213186_at    | <i>DZIP3</i>    | DAZ interacting protein 3, zinc finger                                      | -0.471 | 2.4E-02          |
| 217197_x_at  | <i>N4BP2L1</i>  | NEDD4 binding protein 2-like 1                                              | -0.471 | 2.4E-02          |
| 225498_at    | <i>CHMP4B</i>   | charged multivesicular body protein 4B                                      | -0.471 | 2.4E-02          |
| 235005_at    | <i>DIS3L</i>    | DIS3 mitotic control homolog (S. cerevisiae)-like                           | -0.471 | 2.4E-02          |
| 227908_at    | <i>TBC1D24</i>  | TBC1 domain family, member 24                                               | -0.471 | 2.4E-02          |
| 214383_x_at  | <i>KLHDC3</i>   | kelch domain containing 3                                                   | -0.471 | 2.4E-02          |
| 242065_x_at  | <i>IDII</i>     | isopentenyl-diphosphate delta isomerase 1                                   | -0.471 | 2.4E-02          |
| 202250_s_at  | <i>DCAF8</i>    | DDB1 and CUL4 associated factor 8                                           | -0.471 | 2.4E-02          |
| 215311_at    | <i>NTRK3</i>    | neurotrophic tyrosine kinase, receptor, type 3                              | -0.471 | 2.4E-02          |
| 226583_at    | <i>C12orf76</i> | chromosome 12 open reading frame 76                                         | -0.471 | 2.4E-02          |
| 227124_at    | <i>C6orf228</i> | chromosome 6 open reading frame 228                                         | -0.471 | 2.4E-02          |
| 228827_at    | <i>RUNX1T1</i>  | runt-related transcription factor 1; translocated to, 1 (cyclin D-related)  | -0.472 | 2.4E-02          |
| 232366_at    | <i>KIAA0232</i> | KIAA0232                                                                    | -0.472 | 2.4E-02          |
| 224995_at    | <i>SPIRE1</i>   | spire homolog 1 (Drosophila)                                                | -0.472 | 2.4E-02          |
| 202960_s_at  | <i>MUT</i>      | methylmalonyl CoA mutase                                                    | -0.472 | 2.4E-02          |
| 217868_s_at  | <i>METTL9</i>   | methyltransferase like 9                                                    | -0.472 | 2.4E-02          |
| 1553030_a_at | <i>SUOX</i>     | sulfite oxidase                                                             | -0.472 | 2.4E-02          |
| 226049_at    | <i>ERC1</i>     | ELKS/RAB6-interacting/CAST family member 1                                  | -0.472 | 2.4E-02          |
| 213361_at    | <i>TDRD7</i>    | tudor domain containing 7                                                   | -0.472 | 2.4E-02          |

| Probeset ID  | Gene symbol     | Gene description                                                                               | $\rho$ | Adjusted P-value |
|--------------|-----------------|------------------------------------------------------------------------------------------------|--------|------------------|
| 201027_s_at  | <i>EIF5B</i>    | eukaryotic translation initiation factor 5B                                                    | -0.472 | 2.4E-02          |
| 201871_s_at  | <i>UBXN1</i>    | UBX domain protein 1                                                                           | -0.472 | 2.4E-02          |
| 229213_at    | <i>DIRC2</i>    | disrupted in renal carcinoma 2                                                                 | -0.473 | 2.4E-02          |
| 201674_s_at  | <i>AKAP1</i>    | A kinase (PRKA) anchor protein 1                                                               | -0.473 | 2.4E-02          |
| 203597_s_at  | <i>WBP4</i>     | WW domain binding protein 4 (formin binding protein 21)                                        | -0.473 | 2.4E-02          |
| 203607_at    | <i>INPP5F</i>   | inositol polyphosphate-5-phosphatase F                                                         | -0.473 | 2.4E-02          |
| 212500_at    | <i>ADO</i>      | 2-aminoethanethiol (cysteamine) dioxygenase                                                    | -0.473 | 2.4E-02          |
| 225483_at    | <i>VPS26B</i>   | vacuolar protein sorting 26 homolog B (S. pombe)                                               | -0.473 | 2.4E-02          |
| 227839_at    | <i>MBD5</i>     | methyl-CpG binding domain protein 5                                                            | -0.473 | 2.4E-02          |
| 204513_s_at  | <i>ELMO1</i>    | engulfment and cell motility 1                                                                 | -0.473 | 2.4E-02          |
| 225482_at    | <i>KIF1A</i>    | kinesin family member 1A                                                                       | -0.473 | 2.4E-02          |
| 201738_at    | <i>EIF1B</i>    | eukaryotic translation initiation factor 1B                                                    | -0.473 | 2.3E-02          |
| 236332_at    | <i>DHRS7</i>    | dehydrogenase/reductase (SDR family) member 7                                                  | -0.473 | 2.3E-02          |
| 1555391_a_at | <i>ALS2CR8</i>  | amyotrophic lateral sclerosis 2 (juvenile) chromosome region, candidate 8                      | -0.473 | 2.3E-02          |
| 213386_at    | <i>TMEM246</i>  | transmembrane protein 246                                                                      | -0.473 | 2.3E-02          |
| 228177_at    | <i>CREBBP</i>   | CREB binding protein                                                                           | -0.474 | 2.3E-02          |
| 230789_at    | <i>ZNF280B</i>  | zinc finger protein 280B                                                                       | -0.474 | 2.3E-02          |
| 200718_s_at  | <i>SKP1</i>     | S-phase kinase-associated protein 1                                                            | -0.474 | 2.3E-02          |
| 218129_s_at  | <i>NFYB</i>     | nuclear transcription factor Y, beta                                                           | -0.474 | 2.3E-02          |
| 209258_s_at  | <i>SMC3</i>     | structural maintenance of chromosomes 3                                                        | -0.474 | 2.3E-02          |
| 228469_at    | <i>PPID</i>     | Peptidylprolyl isomerase D                                                                     | -0.474 | 2.3E-02          |
| 202341_s_at  | <i>TRIM2</i>    | tripartite motif containing 2                                                                  | -0.474 | 2.3E-02          |
| 210156_s_at  | <i>PCMT1</i>    | protein-L-isoaspartate (D-aspartate) O-methyltransferase                                       | -0.475 | 2.3E-02          |
| 203552_at    | <i>MAP4K5</i>   | mitogen-activated protein kinase kinase kinase 5                                               | -0.475 | 2.3E-02          |
| 209617_s_at  | <i>CTNND2</i>   | catenin (cadherin-associated protein), delta 2 (neural plakophilin-related arm-repeat protein) | -0.475 | 2.3E-02          |
| 227539_at    | <i>GNA13</i>    | guanine nucleotide binding protein (G protein), alpha 13                                       | -0.475 | 2.3E-02          |
| 238076_at    | <i>GATAD2B</i>  | GATA zinc finger domain containing 2B                                                          | -0.475 | 2.3E-02          |
| 216129_at    | <i>ATP9A</i>    | ATPase, class II, type 9A                                                                      | -0.475 | 2.3E-02          |
| 221534_at    | <i>C11orf68</i> | chromosome 11 open reading frame 68                                                            | -0.475 | 2.3E-02          |
| 221482_s_at  | <i>ARPPP19</i>  | cAMP-regulated phosphoprotein, 19kDa                                                           | -0.475 | 2.3E-02          |
| 225810_at    | <i>MTMR10</i>   | myotubularin related protein 10                                                                | -0.475 | 2.3E-02          |
| 230479_at    | <i>EIF3F</i>    | eukaryotic translation initiation factor 3, subunit F                                          | -0.475 | 2.3E-02          |
| 205664_at    | <i>KIN</i>      | KIN, antigenic determinant of recA protein homolog (mouse)                                     | -0.476 | 2.3E-02          |
| 225435_at    | <i>SSRI</i>     | signal sequence receptor, alpha                                                                | -0.476 | 2.3E-02          |
| 1559517_a_at | <i>SPIRE1</i>   | spire homolog 1 (Drosophila)                                                                   | -0.476 | 2.2E-02          |
| 209221_s_at  | <i>OSBPL2</i>   | oxysterol binding protein-like 2                                                               | -0.476 | 2.2E-02          |
| 214889_at    | <i>FAM149A</i>  | family with sequence similarity 149, member A                                                  | -0.476 | 2.2E-02          |
| 221735_at    | <i>WDR48</i>    | WD repeat domain 48                                                                            | -0.476 | 2.2E-02          |
| 212631_at    | <i>STX7</i>     | syntaxin 7                                                                                     | -0.476 | 2.2E-02          |
| 204119_s_at  | <i>ADK</i>      | adenosine kinase                                                                               | -0.476 | 2.2E-02          |
| 203627_at    | <i>IGF1R</i>    | insulin-like growth factor 1 receptor                                                          | -0.476 | 2.2E-02          |
| 212502_at    | <i>ADO</i>      | 2-aminoethanethiol (cysteamine) dioxygenase                                                    | -0.476 | 2.2E-02          |
| 224614_at    | <i>DYNC1L2</i>  | dynein, cytoplasmic 1, light intermediate chain 2                                              | -0.476 | 2.2E-02          |
| 203531_at    | <i>CUL5</i>     | cullin 5                                                                                       | -0.476 | 2.2E-02          |
| 203651_at    | <i>ZFYVE16</i>  | zinc finger, FYVE domain containing 16                                                         | -0.476 | 2.2E-02          |

| Probeset ID | Gene symbol     | Gene description                                                                                               | $\rho$ | Adjusted P-value |
|-------------|-----------------|----------------------------------------------------------------------------------------------------------------|--------|------------------|
| 212170_at   | <i>RBM12</i>    | RNA binding motif protein 12                                                                                   | -0.477 | 2.2E-02          |
| 224835_at   | <i>GPCPD1</i>   | glycerophosphocholine phosphodiesterase GDE1 homolog ( <i>S. cerevisiae</i> )                                  | -0.477 | 2.2E-02          |
| 227022_at   | <i>GNPDA2</i>   | glucosamine-6-phosphate deaminase 2                                                                            | -0.477 | 2.2E-02          |
| 220761_s_at | <i>TAOK3</i>    | TAO kinase 3                                                                                                   | -0.477 | 2.2E-02          |
| 223701_s_at | <i>USP47</i>    | ubiquitin specific peptidase 47                                                                                | -0.477 | 2.2E-02          |
| 229774_at   | <i>CXXC4</i>    | CXXC finger protein 4                                                                                          | -0.477 | 2.2E-02          |
| 36612_at    | <i>FAM168A</i>  | family with sequence similarity 168, member A                                                                  | -0.477 | 2.2E-02          |
| 210078_s_at | <i>KCNAB1</i>   | potassium voltage-gated channel, shaker-related subfamily, beta member 1                                       | -0.477 | 2.2E-02          |
| 226310_at   | <i>RICTOR</i>   | RPTOR independent companion of MTOR, complex 2                                                                 | -0.477 | 2.2E-02          |
| 38398_at    | <i>MADD</i>     | MAP-kinase activating death domain                                                                             | -0.477 | 2.2E-02          |
| 222541_at   | <i>RSF1</i>     | remodeling and spacing factor 1                                                                                | -0.478 | 2.2E-02          |
| 229298_at   | <i>KBTBD7</i>   | kelch repeat and BTB (POZ) domain containing 7                                                                 | -0.478 | 2.2E-02          |
| 200883_at   | <i>UQCRC2</i>   | ubiquinol-cytochrome c reductase core protein II                                                               | -0.478 | 2.2E-02          |
| 233870_at   | <i>NAV1</i>     | neuron navigator 1                                                                                             | -0.478 | 2.2E-02          |
| 226713_at   | <i>CCDC50</i>   | coiled-coil domain containing 50                                                                               | -0.478 | 2.2E-02          |
| 219567_s_at | <i>DEMI</i>     | defects in morphology 1 homolog ( <i>S. cerevisiae</i> )                                                       | -0.478 | 2.2E-02          |
| 221480_at   | <i>HNRNPD</i>   | heterogeneous nuclear ribonucleoprotein D (AU-rich element RNA binding protein 1, 37kDa)                       | -0.478 | 2.2E-02          |
| 224764_at   | <i>ARHGAP21</i> | Rho GTPase activating protein 21                                                                               | -0.478 | 2.2E-02          |
| 222931_s_at | <i>THNSL1</i>   | threonine synthase-like 1 ( <i>S. cerevisiae</i> )                                                             | -0.478 | 2.2E-02          |
| 200735_x_at | <i>NACA</i>     | nascent polypeptide-associated complex alpha subunit                                                           | -0.478 | 2.2E-02          |
| 229705_at   | <i>PIK3C3</i>   | phosphoinositide-3-kinase, class 3                                                                             | -0.478 | 2.2E-02          |
| 1552789_at  | <i>SEC62</i>    | SEC62 homolog ( <i>S. cerevisiae</i> )                                                                         | -0.479 | 2.2E-02          |
| 214663_at   | <i>DSTYK</i>    | dual serine/threonine and tyrosine protein kinase                                                              | -0.479 | 2.2E-02          |
| 209430_at   | <i>BTAF1</i>    | BTAF1 RNA polymerase II, B-TFIID transcription factor-associated, 170kDa (Mot1 homolog, <i>S. cerevisiae</i> ) | -0.479 | 2.2E-02          |
| 202922_at   | <i>GCLC</i>     | glutamate-cysteine ligase, catalytic subunit                                                                   | -0.479 | 2.2E-02          |
| 219819_s_at | <i>MRPS28</i>   | mitochondrial ribosomal protein S28                                                                            | -0.479 | 2.2E-02          |
| 204635_at   | <i>RPS6KA5</i>  | ribosomal protein S6 kinase, 90kDa, polypeptide 5                                                              | -0.479 | 2.2E-02          |
| 204042_at   | <i>WASF3</i>    | WAS protein family, member 3                                                                                   | -0.479 | 2.2E-02          |
| 212184_s_at | <i>TAB2</i>     | TGF-beta activated kinase 1/MAP3K7 binding protein 2                                                           | -0.479 | 2.2E-02          |
| 212735_at   | <i>KIAA0226</i> | KIAA0226                                                                                                       | -0.479 | 2.2E-02          |
| 230230_at   | <i>PTPN4</i>    | protein tyrosine phosphatase, non-receptor type 4 (megakaryocyte)                                              | -0.479 | 2.2E-02          |
| 201384_s_at | <i>NBR1</i>     | neighbor of BRCA1 gene 1                                                                                       | -0.479 | 2.2E-02          |
| 216885_s_at | <i>DCAF8</i>    | DDB1 and CUL4 associated factor 8                                                                              | -0.479 | 2.2E-02          |
| 218184_at   | <i>TULP4</i>    | tubby like protein 4                                                                                           | -0.479 | 2.2E-02          |
| 213228_at   | <i>PDE8B</i>    | phosphodiesterase 8B                                                                                           | -0.479 | 2.2E-02          |
| 227026_at   | <i>MPHOSPH8</i> | M-phase phosphoprotein 8                                                                                       | -0.479 | 2.2E-02          |
| 229851_s_at | <i>C11orf54</i> | chromosome 11 open reading frame 54                                                                            | -0.479 | 2.2E-02          |
| 202261_at   | <i>VPS72</i>    | vacuolar protein sorting 72 homolog ( <i>S. cerevisiae</i> )                                                   | -0.480 | 2.2E-02          |
| 210108_at   | <i>CACNAID</i>  | calcium channel, voltage-dependent, L type, alpha 1D subunit                                                   | -0.480 | 2.2E-02          |
| 214659_x_at | <i>YLPM1</i>    | YLP motif containing 1                                                                                         | -0.480 | 2.2E-02          |
| 201927_s_at | <i>PKP4</i>     | plakophilin 4                                                                                                  | -0.480 | 2.1E-02          |
| 200866_s_at | <i>PSAP</i>     | prosaposin                                                                                                     | -0.480 | 2.1E-02          |
| 222016_s_at | <i>ZNF323</i>   | zinc finger protein 323                                                                                        | -0.480 | 2.1E-02          |
| 229211_at   | <i>DUSP28</i>   | dual specificity phosphatase 28                                                                                | -0.480 | 2.1E-02          |



| Probeset ID  | Gene symbol      | Gene description                                                                                  | $\rho$ | Adjusted P-value |
|--------------|------------------|---------------------------------------------------------------------------------------------------|--------|------------------|
| 1552790_a_at | <i>SEC62</i>     | SEC62 homolog (S. cerevisiae)                                                                     | -0.480 | 2.1E-02          |
| 203079_s_at  | <i>CUL2</i>      | cullin 2                                                                                          | -0.480 | 2.1E-02          |
| 214890_s_at  | <i>FAM149A</i>   | family with sequence similarity 149, member A                                                     | -0.480 | 2.1E-02          |
| 218393_s_at  | <i>SMU1</i>      | smu-1 suppressor of mec-8 and unc-52 homolog (C. elegans)                                         | -0.480 | 2.1E-02          |
| 229940_at    | <i>SETD3</i>     | SET domain containing 3                                                                           | -0.481 | 2.1E-02          |
| 210284_s_at  | <i>TAB2</i>      | TGF-beta activated kinase 1/MAP3K7 binding protein 2                                              | -0.481 | 2.1E-02          |
| 212257_s_at  | <i>SMARCA2</i>   | SWI/SNF related, matrix associated, actin dependent regulator of chromatin, subfamily a, member 2 | -0.481 | 2.1E-02          |
| 223248_at    | <i>HSDL1</i>     | hydroxysteroid dehydrogenase like 1                                                               | -0.481 | 2.1E-02          |
| 242032_at    | <i>KIDINS220</i> | kinase D-interacting substrate, 220kDa                                                            | -0.481 | 2.1E-02          |
| 227521_at    | <i>FBXO33</i>    | F-box protein 33                                                                                  | -0.481 | 2.1E-02          |
| 201080_at    | <i>PIP4K2B</i>   | phosphatidylinositol-5-phosphate 4-kinase, type II, beta                                          | -0.481 | 2.1E-02          |
| 236026_at    | <i>GPATCH2</i>   | G patch domain containing 2                                                                       | -0.481 | 2.1E-02          |
| 227191_at    | <i>ITFG1</i>     | integrin alpha FG-GAP repeat containing 1                                                         | -0.481 | 2.1E-02          |
| 209750_at    | <i>NR1D2</i>     | nuclear receptor subfamily 1, group D, member 2                                                   | -0.481 | 2.1E-02          |
| 210588_x_at  | <i>HNRNPH3</i>   | heterogeneous nuclear ribonucleoprotein H3 (2H9)                                                  | -0.481 | 2.1E-02          |
| 229713_at    | <i>PIP4K2A</i>   | Phosphatidylinositol-5-phosphate 4-kinase, type II, alpha                                         | -0.482 | 2.1E-02          |
| 229653_at    | <i>VPS53</i>     | vacuolar protein sorting 53 homolog (S. cerevisiae)                                               | -0.482 | 2.1E-02          |
| 220841_s_at  | <i>AH11</i>      | Abelson helper integration site 1                                                                 | -0.482 | 2.1E-02          |
| 211431_s_at  | <i>TYRO3</i>     | TYRO3 protein tyrosine kinase                                                                     | -0.482 | 2.1E-02          |
| 201439_at    | <i>GBF1</i>      | golgi brefeldin A resistant guanine nucleotide exchange factor 1                                  | -0.482 | 2.1E-02          |
| 204772_s_at  | <i>TTF1</i>      | transcription termination factor, RNA polymerase I                                                | -0.482 | 2.1E-02          |
| 212914_at    | <i>CBX7</i>      | chromobox homolog 7                                                                               | -0.482 | 2.1E-02          |
| 238879_at    | <i>DCUN1D1</i>   | DCN1, defective in cullin neddylation 1, domain containing 1 (S. cerevisiae)                      | -0.482 | 2.1E-02          |
| 1554472_a_at | <i>PHF20L1</i>   | PHD finger protein 20-like 1                                                                      | -0.483 | 2.1E-02          |
| 1555993_at   | <i>CACNA1D</i>   | calcium channel, voltage-dependent, L type, alpha 1D subunit                                      | -0.483 | 2.1E-02          |
| 238458_at    | <i>EFHA2</i>     | EF-hand domain family, member A2                                                                  | -0.483 | 2.1E-02          |
| 212688_at    | <i>PIK3CB</i>    | phosphoinositide-3-kinase, catalytic, beta polypeptide                                            | -0.483 | 2.1E-02          |
| 222803_at    | <i>PRTFDC1</i>   | phosphoribosyl transferase domain containing 1                                                    | -0.483 | 2.1E-02          |
| 223515_s_at  | <i>COQ3</i>      | coenzyme Q3 homolog, methyltransferase (S. cerevisiae)                                            | -0.483 | 2.1E-02          |
| 219543_at    | <i>PBLD</i>      | phenazine biosynthesis-like protein domain containing                                             | -0.483 | 2.1E-02          |
| 221757_at    | <i>PIK3IP1</i>   | phosphoinositide-3-kinase interacting protein 1                                                   | -0.483 | 2.1E-02          |
| 226343_at    | <i>DPP8</i>      | dipeptidyl-peptidase 8                                                                            | -0.483 | 2.0E-02          |
| 212982_at    | <i>ZDHHC17</i>   | zinc finger, DHHC-type containing 17                                                              | -0.483 | 2.0E-02          |
| 225900_at    | <i>EXOC6B</i>    | exocyst complex component 6B                                                                      | -0.483 | 2.0E-02          |
| 200947_s_at  | <i>GLUD1</i>     | glutamate dehydrogenase 1                                                                         | -0.484 | 2.0E-02          |
| 201685_s_at  | <i>TOX4</i>      | TOX high mobility group box family member 4                                                       | -0.484 | 2.0E-02          |
| 204367_at    | <i>SP2</i>       | Sp2 transcription factor                                                                          | -0.484 | 2.0E-02          |
| 207724_s_at  | <i>SPAST</i>     | spastin                                                                                           | -0.484 | 2.0E-02          |
| 201782_s_at  | <i>AIP</i>       | aryl hydrocarbon receptor interacting protein                                                     | -0.484 | 2.0E-02          |
| 235634_at    | <i>PURG</i>      | purine-rich element binding protein G                                                             | -0.484 | 2.0E-02          |
| 202318_s_at  | <i>SENPE6</i>    | SUMO1/sentrin specific peptidase 6                                                                | -0.484 | 2.0E-02          |
| 218550_s_at  | <i>LRRC20</i>    | leucine rich repeat containing 20                                                                 | -0.484 | 2.0E-02          |
| 213837_at    | <i>L3MBTL1</i>   | l(3)mbt-like 1 (Drosophila)                                                                       | -0.484 | 2.0E-02          |
| 203382_s_at  | <i>APOE</i>      | apolipoprotein E                                                                                  | -0.485 | 2.0E-02          |

| Probeset ID  | Gene symbol     | Gene description                                                             | $\rho$ | Adjusted P-value |
|--------------|-----------------|------------------------------------------------------------------------------|--------|------------------|
| 236721_at    | <i>ALKBH1</i>   | alkB, alkylation repair homolog 1 (E. coli)                                  | -0.485 | 2.0E-02          |
| 200684_s_at  | <i>UBE2L3</i>   | ubiquitin-conjugating enzyme E2L 3                                           | -0.485 | 2.0E-02          |
| 207127_s_at  | <i>HNRNPH3</i>  | heterogeneous nuclear ribonucleoprotein H3 (2H9)                             | -0.485 | 2.0E-02          |
| 202020_s_at  | <i>LANCL1</i>   | LanC lantibiotic synthetase component C-like 1 (bacterial)                   | -0.485 | 2.0E-02          |
| 202073_at    | <i>OPTN</i>     | optineurin                                                                   | -0.485 | 2.0E-02          |
| 228456_s_at  | <i>CDS2</i>     | CDP-diacylglycerol synthase (phosphatidate cytidyltransferase) 2             | -0.485 | 2.0E-02          |
| 241469_at    | <i>HFM1</i>     | HFM1, ATP-dependent DNA helicase homolog (S. cerevisiae)                     | -0.485 | 2.0E-02          |
| 46270_at     | <i>UBAP1</i>    | ubiquitin associated protein 1                                               | -0.485 | 2.0E-02          |
| 214723_x_at  | <i>ANKRD36</i>  | ankyrin repeat domain 36                                                     | -0.486 | 2.0E-02          |
| 218242_s_at  | <i>SUV420H1</i> | suppressor of variegation 4-20 homolog 1 (Drosophila)                        | -0.486 | 2.0E-02          |
| 230560_at    | <i>STXBP6</i>   | syntaxin binding protein 6 (amisyn)                                          | -0.486 | 2.0E-02          |
| 204411_at    | <i>KIF21B</i>   | kinesin family member 21B                                                    | -0.486 | 1.9E-02          |
| 229460_at    | <i>FAM126B</i>  | family with sequence similarity 126, member B                                | -0.486 | 1.9E-02          |
| 230329_s_at  | <i>NUDT6</i>    | nudix (nucleoside diphosphate linked moiety X)-type motif 6                  | -0.486 | 1.9E-02          |
| 233241_at    | <i>PLK1S1</i>   | polo-like kinase 1 substrate 1                                               | -0.486 | 1.9E-02          |
| 218857_s_at  | <i>ASRGL1</i>   | asparaginase like 1                                                          | -0.486 | 1.9E-02          |
| 201877_s_at  | <i>PPP2R5C</i>  | protein phosphatase 2, regulatory subunit B', gamma                          | -0.487 | 1.9E-02          |
| 216096_s_at  | <i>NRXN1</i>    | neurexin 1                                                                   | -0.487 | 1.9E-02          |
| 211034_s_at  | <i>C12orf51</i> | chromosome 12 open reading frame 51                                          | -0.487 | 1.9E-02          |
| 215151_at    | <i>DOCK10</i>   | dedicator of cytokinesis 10                                                  | -0.487 | 1.9E-02          |
| 218166_s_at  | <i>RSF1</i>     | remodeling and spacing factor 1                                              | -0.487 | 1.9E-02          |
| 202361_at    | <i>SEC24C</i>   | SEC24 family, member C (S. cerevisiae)                                       | -0.487 | 1.9E-02          |
| 221207_s_at  | <i>NBEA</i>     | neurobeachin                                                                 | -0.487 | 1.9E-02          |
| 201830_s_at  | <i>NET1</i>     | neuroepithelial cell transforming 1                                          | -0.487 | 1.9E-02          |
| 224990_at    | <i>C4orf34</i>  | chromosome 4 open reading frame 34                                           | -0.487 | 1.9E-02          |
| 235885_at    | <i>P2RY12</i>   | purinergic receptor P2Y, G-protein coupled, 12                               | -0.487 | 1.9E-02          |
| 222764_at    | <i>ASRGL1</i>   | asparaginase like 1                                                          | -0.488 | 1.9E-02          |
| 228523_at    | <i>NANOS1</i>   | nanos homolog 1 (Drosophila)                                                 | -0.488 | 1.9E-02          |
| 235115_at    | <i>PDE8B</i>    | phosphodiesterase 8B                                                         | -0.488 | 1.9E-02          |
| 202033_s_at  | <i>RB1CC1</i>   | RB1-inducible coiled-coil 1                                                  | -0.488 | 1.9E-02          |
| 204137_at    | <i>GPR137B</i>  | G protein-coupled receptor 137B                                              | -0.488 | 1.9E-02          |
| 222533_at    | <i>CRBN</i>     | cereblon                                                                     | -0.488 | 1.9E-02          |
| 237408_at    | <i>DCUN1D1</i>  | DCN1, defective in cullin neddylation 1, domain containing 1 (S. cerevisiae) | -0.488 | 1.9E-02          |
| 223741_s_at  | <i>TTYH2</i>    | tweety homolog 2 (Drosophila)                                                | -0.488 | 1.9E-02          |
| 1556695_a_at | <i>FLJ42709</i> | uncharacterized LOC441094                                                    | -0.488 | 1.9E-02          |
| 201800_s_at  | <i>OSBP</i>     | oxysterol binding protein                                                    | -0.488 | 1.9E-02          |
| 205895_s_at  | <i>NOLC1</i>    | nucleolar and coiled-body phosphoprotein 1                                   | -0.488 | 1.9E-02          |
| 209234_at    | <i>KIF1B</i>    | kinesin family member 1B                                                     | -0.489 | 1.9E-02          |
| 202342_s_at  | <i>TRIM2</i>    | tripartite motif containing 2                                                | -0.489 | 1.9E-02          |
| 226154_at    | <i>DNM1L</i>    | dynamamin 1-like                                                             | -0.489 | 1.9E-02          |
| 1555905_a_at | <i>C3orf23</i>  | chromosome 3 open reading frame 23                                           | -0.489 | 1.9E-02          |
| 211382_s_at  | <i>TACC2</i>    | transforming, acidic coiled-coil containing protein 2                        | -0.489 | 1.9E-02          |
| 214724_at    | <i>DIXDC1</i>   | DIX domain containing 1                                                      | -0.489 | 1.9E-02          |
| 205353_s_at  | <i>PEBP1</i>    | phosphatidylethanolamine binding protein 1                                   | -0.489 | 1.9E-02          |

| Probeset ID  | Gene symbol      | Gene description                                                          | $\rho$ | Adjusted P-value |
|--------------|------------------|---------------------------------------------------------------------------|--------|------------------|
| 236538_at    | <i>GRIA2</i>     | glutamate receptor, ionotropic, AMPA 2                                    | -0.489 | 1.9E-02          |
| 213410_at    | <i>C10orf137</i> | chromosome 10 open reading frame 137                                      | -0.489 | 1.9E-02          |
| 219190_s_at  | <i>EIF2C4</i>    | eukaryotic translation initiation factor 2C, 4                            | -0.489 | 1.9E-02          |
| 205240_at    | <i>GPSM2</i>     | G-protein signaling modulator 2                                           | -0.490 | 1.8E-02          |
| 224901_at    | <i>SCD5</i>      | stearoyl-CoA desaturase 5                                                 | -0.490 | 1.8E-02          |
| 236105_at    | <i>ZBTB10</i>    | zinc finger and BTB domain containing 10                                  | -0.490 | 1.8E-02          |
| 214691_x_at  | <i>FAM63B</i>    | family with sequence similarity 63, member B                              | -0.490 | 1.8E-02          |
| 217848_s_at  | <i>PPA1</i>      | pyrophosphatase (inorganic) 1                                             | -0.490 | 1.8E-02          |
| 228745_at    | <i>SGTB</i>      | small glutamine-rich tetratricopeptide repeat (TPR)-containing, beta      | -0.490 | 1.8E-02          |
| 202590_s_at  | <i>PDK2</i>      | pyruvate dehydrogenase kinase, isozyme 2                                  | -0.491 | 1.8E-02          |
| 226631_at    | <i>METTL10</i>   | methyltransferase like 10                                                 | -0.491 | 1.8E-02          |
| 213954_at    | <i>FAM169A</i>   | family with sequence similarity 169, member A                             | -0.491 | 1.8E-02          |
| 225781_at    | <i>MAPK9</i>     | mitogen-activated protein kinase 9                                        | -0.491 | 1.8E-02          |
| 238649_at    | <i>PITPNC1</i>   | phosphatidylinositol transfer protein, cytoplasmic 1                      | -0.491 | 1.8E-02          |
| 209143_s_at  | <i>CLNS1A</i>    | chloride channel, nucleotide-sensitive, 1A                                | -0.491 | 1.8E-02          |
| 228471_at    | <i>ANKRD44</i>   | ankyrin repeat domain 44                                                  | -0.491 | 1.8E-02          |
| 203724_s_at  | <i>RUFY3</i>     | RUN and FYVE domain containing 3                                          | -0.491 | 1.8E-02          |
| 236208_at    | <i>MOCS2</i>     | molybdenum cofactor synthesis 2                                           | -0.491 | 1.8E-02          |
| 235579_at    | <i>SCAF11</i>    | SR-related CTD-associated factor 11                                       | -0.491 | 1.8E-02          |
| 213351_s_at  | <i>TMCC1</i>     | transmembrane and coiled-coil domain family 1                             | -0.491 | 1.8E-02          |
| 203711_s_at  | <i>HIBCH</i>     | 3-hydroxyisobutyryl-CoA hydrolase                                         | -0.491 | 1.8E-02          |
| 200719_at    | <i>SKP1</i>      | S-phase kinase-associated protein 1                                       | -0.492 | 1.8E-02          |
| 225330_at    | <i>IGF1R</i>     | insulin-like growth factor 1 receptor                                     | -0.492 | 1.8E-02          |
| 241698_at    | <i>RFTN2</i>     | raftlin family member 2                                                   | -0.492 | 1.8E-02          |
| 217906_at    | <i>KLHDC2</i>    | kelch domain containing 2                                                 | -0.492 | 1.8E-02          |
| 224730_at    | <i>DCAF7</i>     | DDB1 and CUL4 associated factor 7                                         | -0.492 | 1.8E-02          |
| 219641_at    | <i>DET1</i>      | de-etiolated homolog 1 (Arabidopsis)                                      | -0.492 | 1.8E-02          |
| 225352_at    | <i>SEC62</i>     | SEC62 homolog (S. cerevisiae)                                             | -0.492 | 1.8E-02          |
| 240172_at    | <i>ERGIC2</i>    | ERGIC and golgi 2                                                         | -0.492 | 1.8E-02          |
| 1554510_s_at | <i>GHITM</i>     | growth hormone inducible transmembrane protein                            | -0.493 | 1.8E-02          |
| 214046_at    | <i>FUT9</i>      | fucosyltransferase 9 (alpha (1,3) fucosyltransferase)                     | -0.493 | 1.8E-02          |
| 225363_at    | <i>PTEN</i>      | phosphatase and tensin homolog                                            | -0.493 | 1.8E-02          |
| 213758_at    | <i>COX4II</i>    | cytochrome c oxidase subunit IV isoform 1                                 | -0.493 | 1.8E-02          |
| 212632_at    | <i>STX7</i>      | syntaxin 7                                                                | -0.493 | 1.8E-02          |
| 200926_at    | <i>RPS23</i>     | ribosomal protein S23                                                     | -0.493 | 1.8E-02          |
| 203849_s_at  | <i>KIF1A</i>     | kinesin family member 1A                                                  | -0.493 | 1.8E-02          |
| 223118_s_at  | <i>USP47</i>     | ubiquitin specific peptidase 47                                           | -0.493 | 1.8E-02          |
| 228051_at    | <i>KIAA1244</i>  | KIAA1244                                                                  | -0.493 | 1.8E-02          |
| 211559_s_at  | <i>CCNG2</i>     | cyclin G2                                                                 | -0.493 | 1.8E-02          |
| 226022_at    | <i>SASH1</i>     | SAM and SH3 domain containing 1                                           | -0.493 | 1.8E-02          |
| 229244_at    | <i>LSAMP</i>     | limbic system-associated membrane protein                                 | -0.493 | 1.8E-02          |
| 204753_s_at  | <i>HLF</i>       | hepatic leukemia factor                                                   | -0.493 | 1.8E-02          |
| 219834_at    | <i>ALS2CR8</i>   | amyotrophic lateral sclerosis 2 (juvenile) chromosome region, candidate 8 | -0.493 | 1.8E-02          |
| 243606_at    | <i>NXPE3</i>     | neurexophilin and PC-esterase domain family, member 3                     | -0.494 | 1.7E-02          |
| 203031_s_at  | <i>UROS</i>      | uroporphyrinogen III synthase                                             | -0.494 | 1.7E-02          |
| 244334_at    | <i>TRAMIL1</i>   | translocation associated membrane protein 1-like 1                        | -0.494 | 1.7E-02          |
| 231944_at    | <i>ERO1LB</i>    | ERO1-like beta (S. cerevisiae)                                            | -0.494 | 1.7E-02          |

| Probeset ID  | Gene symbol     | Gene description                                                                                  | $\rho$ | Adjusted P-value |
|--------------|-----------------|---------------------------------------------------------------------------------------------------|--------|------------------|
| 201997_s_at  | <i>SPEN</i>     | spen homolog, transcriptional regulator (Drosophila)                                              | -0.495 | 1.7E-02          |
| 203464_s_at  | <i>EPN2</i>     | epsin 2                                                                                           | -0.495 | 1.7E-02          |
| 216035_x_at  | <i>TCF7L2</i>   | transcription factor 7-like 2 (T-cell specific, HMG-box)                                          | -0.495 | 1.7E-02          |
| 228310_at    | <i>ENAH</i>     | enabled homolog (Drosophila)                                                                      | -0.495 | 1.7E-02          |
| 228044_at    | <i>SERP2</i>    | stress-associated endoplasmic reticulum protein family member 2                                   | -0.495 | 1.7E-02          |
| 239711_at    | <i>ADAL</i>     | adenosine deaminase-like                                                                          | -0.495 | 1.7E-02          |
| 205152_at    | <i>SLC6A1</i>   | solute carrier family 6 (neurotransmitter transporter, GABA), member 1                            | -0.496 | 1.7E-02          |
| 234192_s_at  | <i>GKAP1</i>    | G kinase anchoring protein 1                                                                      | -0.496 | 1.7E-02          |
| 1569108_a_at | <i>ZNF589</i>   | zinc finger protein 589                                                                           | -0.496 | 1.7E-02          |
| 238523_at    | <i>KLHL36</i>   | kelch-like 36 (Drosophila)                                                                        | -0.496 | 1.7E-02          |
| 224692_at    | <i>PPP1R15B</i> | protein phosphatase 1, regulatory subunit 15B                                                     | -0.496 | 1.7E-02          |
| 206233_at    | <i>B4GALT6</i>  | UDP-Gal:betaGlcNAc beta 1,4- galactosyltransferase, polypeptide 6                                 | -0.496 | 1.7E-02          |
| 228108_at    | <i>PPM1L</i>    | protein phosphatase, Mg <sup>2+</sup> /Mn <sup>2+</sup> dependent, 1L                             | -0.496 | 1.7E-02          |
| 226259_at    | <i>EXOC6</i>    | exocyst complex component 6                                                                       | -0.496 | 1.7E-02          |
| 201971_s_at  | <i>ATP6V1A</i>  | ATPase, H <sup>+</sup> transporting, lysosomal 70kDa, V1 subunit A                                | -0.497 | 1.6E-02          |
| 223960_s_at  | <i>C16orf5</i>  | chromosome 16 open reading frame 5                                                                | -0.497 | 1.6E-02          |
| 228547_at    | <i>NRXN1</i>    | neurexin 1                                                                                        | -0.497 | 1.6E-02          |
| 201218_at    | <i>CTBP2</i>    | C-terminal binding protein 2                                                                      | -0.498 | 1.6E-02          |
| 239741_at    | <i>PYGO1</i>    | pygopus homolog 1 (Drosophila)                                                                    | -0.498 | 1.6E-02          |
| 235378_at    | <i>FAM161B</i>  | family with sequence similarity 161, member B                                                     | -0.498 | 1.6E-02          |
| 224332_s_at  | <i>MRPL43</i>   | mitochondrial ribosomal protein L43                                                               | -0.498 | 1.6E-02          |
| 203376_at    | <i>CDC40</i>    | cell division cycle 40 homolog (S. cerevisiae)                                                    | -0.498 | 1.6E-02          |
| 213312_at    | <i>C6orf162</i> | chromosome 6 open reading frame 162                                                               | -0.498 | 1.6E-02          |
| 225020_at    | <i>DAB2IP</i>   | DAB2 interacting protein                                                                          | -0.498 | 1.6E-02          |
| 1558293_at   | <i>KIAA1107</i> | KIAA1107                                                                                          | -0.498 | 1.6E-02          |
| 201372_s_at  | <i>CUL3</i>     | cullin 3                                                                                          | -0.498 | 1.6E-02          |
| 203860_at    | <i>PCCA</i>     | propionyl CoA carboxylase, alpha polypeptide                                                      | -0.498 | 1.6E-02          |
| 205052_at    | <i>AUH</i>      | AU RNA binding protein/enoyl-CoA hydratase                                                        | -0.498 | 1.6E-02          |
| 227584_at    | <i>NAV1</i>     | neuron navigator 1                                                                                | -0.498 | 1.6E-02          |
| 231873_at    | <i>BMPR2</i>    | bone morphogenetic protein receptor, type II (serine/threonine kinase)                            | -0.498 | 1.6E-02          |
| 235787_at    | <i>CDC37L1</i>  | cell division cycle 37 homolog (S. cerevisiae)-like 1                                             | -0.499 | 1.6E-02          |
| 1554789_a_at | <i>PDE8B</i>    | phosphodiesterase 8B                                                                              | -0.499 | 1.6E-02          |
| 206544_x_at  | <i>SMARCA2</i>  | SWI/SNF related, matrix associated, actin dependent regulator of chromatin, subfamily a, member 2 | -0.499 | 1.6E-02          |
| 206806_at    | <i>DGKI</i>     | diacylglycerol kinase, iota                                                                       | -0.499 | 1.6E-02          |
| 226155_at    | <i>FAM160B1</i> | family with sequence similarity 160, member B1                                                    | -0.500 | 1.6E-02          |
| 225923_at    | <i>VAPB</i>     | VAMP (vesicle-associated membrane protein)-associated protein B and C                             | -0.500 | 1.6E-02          |
| 216044_x_at  | <i>FAM69A</i>   | family with sequence similarity 69, member A                                                      | -0.500 | 1.5E-02          |
| 223366_at    | <i>ZNF704</i>   | zinc finger protein 704                                                                           | -0.500 | 1.5E-02          |
| 211006_s_at  | <i>KCNBI</i>    | potassium voltage-gated channel, Shab-related subfamily, member 1                                 | -0.501 | 1.5E-02          |
| 208848_at    | <i>ADH5</i>     | alcohol dehydrogenase 5 (class III), chi polypeptide                                              | -0.501 | 1.5E-02          |
| 227607_at    | <i>STAMBPL1</i> | STAM binding protein-like 1                                                                       | -0.501 | 1.5E-02          |
| 204072_s_at  | <i>FRY</i>      | furry homolog (Drosophila)                                                                        | -0.501 | 1.5E-02          |

| Probeset ID | Gene symbol     | Gene description                                                                      | $\rho$ | Adjusted P-value |
|-------------|-----------------|---------------------------------------------------------------------------------------|--------|------------------|
| 221326_s_at | <i>TUBD1</i>    | tubulin, delta 1                                                                      | -0.501 | 1.5E-02          |
| 205562_at   | <i>RPP38</i>    | ribonuclease P/MRP 38kDa subunit                                                      | -0.502 | 1.5E-02          |
| 221012_s_at | <i>TRIM8</i>    | tripartite motif containing 8                                                         | -0.502 | 1.5E-02          |
| 203067_at   | <i>PDHX</i>     | pyruvate dehydrogenase complex, component X                                           | -0.502 | 1.5E-02          |
| 223604_at   | <i>GARNL3</i>   | GTPase activating Rap/RanGAP domain-like 3                                            | -0.502 | 1.5E-02          |
| 203232_s_at | <i>ATXN1</i>    | ataxin 1                                                                              | -0.502 | 1.5E-02          |
| 212991_at   | <i>FBXO9</i>    | F-box protein 9                                                                       | -0.502 | 1.5E-02          |
| 226951_at   | <i>C2orf49</i>  | chromosome 2 open reading frame 49                                                    | -0.502 | 1.5E-02          |
| 229461_x_at | <i>NEGR1</i>    | neuronal growth regulator 1                                                           | -0.502 | 1.5E-02          |
| 229506_at   | <i>PPM1L</i>    | protein phosphatase, Mg <sup>2+</sup> /Mn <sup>2+</sup> dependent, 1L                 | -0.502 | 1.5E-02          |
| 206874_s_at | <i>SLK</i>      | STE20-like kinase                                                                     | -0.503 | 1.5E-02          |
| 226091_s_at | <i>MRFAP1</i>   | Morf4 family associated protein 1                                                     | -0.503 | 1.5E-02          |
| 1556062_at  | <i>RPP30</i>    | ribonuclease P/MRP 30kDa subunit                                                      | -0.503 | 1.5E-02          |
| 211569_s_at | <i>HADH</i>     | hydroxyacyl-CoA dehydrogenase                                                         | -0.503 | 1.5E-02          |
| 229687_s_at | <i>PRDM11</i>   | PR domain containing 11                                                               | -0.503 | 1.5E-02          |
| 205878_at   | <i>POU6F1</i>   | POU class 6 homeobox 1                                                                | -0.503 | 1.5E-02          |
| 205006_s_at | <i>NMT2</i>     | N-myristoyltransferase 2                                                              | -0.503 | 1.5E-02          |
| 209459_s_at | <i>ABAT</i>     | 4-aminobutyrate aminotransferase                                                      | -0.503 | 1.5E-02          |
| 209470_s_at | <i>GPM6A</i>    | glycoprotein M6A                                                                      | -0.503 | 1.5E-02          |
| 229355_at   | <i>UBE2D3</i>   | ubiquitin-conjugating enzyme E2D 3                                                    | -0.504 | 1.5E-02          |
| 228886_at   | <i>LRRC27</i>   | leucine rich repeat containing 27                                                     | -0.504 | 1.5E-02          |
| 205528_s_at | <i>RUNX1T1</i>  | runt-related transcription factor 1; translocated to, 1 (cyclin D-related)            | -0.504 | 1.5E-02          |
| 209236_at   | <i>SLC23A2</i>  | solute carrier family 23 (nucleobase transporters), member 2                          | -0.504 | 1.5E-02          |
| 203037_s_at | <i>MTSS1</i>    | metastasis suppressor 1                                                               | -0.504 | 1.5E-02          |
| 208770_s_at | <i>EIF4EBP2</i> | eukaryotic translation initiation factor 4E binding protein 2                         | -0.504 | 1.5E-02          |
| 214553_s_at | <i>ARPP19</i>   | cAMP-regulated phosphoprotein, 19kDa                                                  | -0.504 | 1.4E-02          |
| 201370_s_at | <i>CUL3</i>     | cullin 3                                                                              | -0.505 | 1.4E-02          |
| 209390_at   | <i>TSC1</i>     | tuberous sclerosis 1                                                                  | -0.505 | 1.4E-02          |
| 217771_at   | <i>GOLM1</i>    | golgi membrane protein 1                                                              | -0.505 | 1.4E-02          |
| 225958_at   | <i>PHC1</i>     | polyhomeotic homolog 1 (Drosophila)                                                   | -0.505 | 1.4E-02          |
| 228120_at   | <i>EIF2C1</i>   | eukaryotic translation initiation factor 2C, 1                                        | -0.505 | 1.4E-02          |
| 209700_x_at | <i>PDE4DIP</i>  | phosphodiesterase 4D interacting protein                                              | -0.505 | 1.4E-02          |
| 213701_at   | <i>C12orf29</i> | chromosome 12 open reading frame 29                                                   | -0.505 | 1.4E-02          |
| 225989_at   | <i>HERC4</i>    | HECT and RLD domain containing E3 ubiquitin protein ligase 4                          | -0.506 | 1.4E-02          |
| 208741_at   | <i>SAP18</i>    | Sin3A-associated protein, 18kDa                                                       | -0.506 | 1.4E-02          |
| 218597_s_at | <i>CISD1</i>    | CDGSH iron sulfur domain 1                                                            | -0.506 | 1.4E-02          |
| 204755_x_at | <i>HLF</i>      | hepatic leukemia factor                                                               | -0.506 | 1.4E-02          |
| 209407_s_at | <i>DEAF1</i>    | deformed epidermal autoregulatory factor 1 (Drosophila)                               | -0.506 | 1.4E-02          |
| 218352_at   | <i>RCBTB1</i>   | regulator of chromosome condensation (RCC1) and BTB (POZ) domain containing protein 1 | -0.506 | 1.4E-02          |
| 228569_at   | <i>PAPOLA</i>   | poly(A) polymerase alpha                                                              | -0.506 | 1.4E-02          |
| 238479_at   | <i>DCUNID5</i>  | DCN1, defective in cullin neddylation 1, domain containing 5 ( <i>S. cerevisiae</i> ) | -0.506 | 1.4E-02          |
| 40612_at    | <i>DOPEY1</i>   | dopey family member 1                                                                 | -0.506 | 1.4E-02          |
| 228018_at   | <i>NKAIN4</i>   | Na <sup>+</sup> /K <sup>+</sup> transporting ATPase interacting 4                     | -0.507 | 1.4E-02          |
| 236703_at   | <i>NT5C2</i>    | 5'-nucleotidase, cytosolic II                                                         | -0.508 | 1.4E-02          |

| Probeset ID  | Gene symbol     | Gene description                                                      | $\rho$ | Adjusted P-value |
|--------------|-----------------|-----------------------------------------------------------------------|--------|------------------|
| 212461_at    | <i>AZIN1</i>    | antizyme inhibitor 1                                                  | -0.508 | 1.4E-02          |
| 229969_at    | <i>SEC63</i>    | SEC63 homolog (S. cerevisiae)                                         | -0.508 | 1.4E-02          |
| 235344_at    | <i>PPM1A</i>    | protein phosphatase, Mg <sup>2+</sup> /Mn <sup>2+</sup> dependent, 1A | -0.508 | 1.4E-02          |
| 236855_at    | <i>C10orf85</i> | chromosome 10 open reading frame 85                                   | -0.508 | 1.4E-02          |
| 221796_at    | <i>NTRK2</i>    | neurotrophic tyrosine kinase, receptor, type 2                        | -0.508 | 1.3E-02          |
| 205231_s_at  | <i>EPM2A</i>    | epilepsy, progressive myoclonus type 2A, Lafora disease (laforin)     | -0.509 | 1.3E-02          |
| 203244_at    | <i>PEX5</i>     | peroxisomal biogenesis factor 5                                       | -0.509 | 1.3E-02          |
| 207974_s_at  | <i>SKP1</i>     | S-phase kinase-associated protein 1                                   | -0.509 | 1.3E-02          |
| 221858_at    | <i>TBC1D12</i>  | TBC1 domain family, member 12                                         | -0.509 | 1.3E-02          |
| 204421_s_at  | <i>FGF2</i>     | fibroblast growth factor 2 (basic)                                    | -0.509 | 1.3E-02          |
| 222544_s_at  | <i>WHSC1L1</i>  | Wolf-Hirschhorn syndrome candidate 1-like 1                           | -0.509 | 1.3E-02          |
| 227433_at    | <i>KIAA2018</i> | KIAA2018                                                              | -0.509 | 1.3E-02          |
| 209249_s_at  | <i>GHITM</i>    | growth hormone inducible transmembrane protein                        | -0.510 | 1.3E-02          |
| 213035_at    | <i>ANKRD28</i>  | ankyrin repeat domain 28                                              | -0.510 | 1.3E-02          |
| 219770_at    | <i>GTDC1</i>    | glycosyltransferase-like domain containing 1                          | -0.510 | 1.3E-02          |
| 201991_s_at  | <i>KIF5B</i>    | kinesin family member 5B                                              | -0.510 | 1.3E-02          |
| 209839_at    | <i>DNM3</i>     | dynammin 3                                                            | -0.510 | 1.3E-02          |
| 212361_s_at  | <i>ATP2A2</i>   | ATPase, Ca <sup>++</sup> transporting, cardiac muscle, slow twitch 2  | -0.510 | 1.3E-02          |
| 213314_at    | <i>C6orf162</i> | chromosome 6 open reading frame 162                                   | -0.510 | 1.3E-02          |
| 214736_s_at  | <i>ADD1</i>     | adducin 1 (alpha)                                                     | -0.510 | 1.3E-02          |
| 213375_s_at  | <i>N4BP2L1</i>  | NEDD4 binding protein 2-like 1                                        | -0.510 | 1.3E-02          |
| 202813_at    | <i>TARBP1</i>   | TAR (HIV-1) RNA binding protein 1                                     | -0.511 | 1.3E-02          |
| 213939_s_at  | <i>RUFY3</i>    | RUN and FYVE domain containing 3                                      | -0.511 | 1.3E-02          |
| 205358_at    | <i>GRIA2</i>    | glutamate receptor, ionotropic, AMPA 2                                | -0.511 | 1.3E-02          |
| 209084_s_at  | <i>RAB28</i>    | RAB28, member RAS oncogene family                                     | -0.511 | 1.3E-02          |
| 244680_at    | <i>GLRB</i>     | glycine receptor, beta                                                | -0.511 | 1.3E-02          |
| 207757_at    | <i>ZFP2</i>     | zinc finger protein 2 homolog (mouse)                                 | -0.511 | 1.3E-02          |
| 220488_s_at  | <i>BCAS3</i>    | breast carcinoma amplified sequence 3                                 | -0.512 | 1.3E-02          |
| 205330_at    | <i>MNI</i>      | meningioma (disrupted in balanced translocation) 1                    | -0.512 | 1.3E-02          |
| 230298_at    | <i>MBLAC2</i>   | metallo-beta-lactamase domain containing 2                            | -0.512 | 1.3E-02          |
| 236935_at    | <i>PTPN4</i>    | protein tyrosine phosphatase, non-receptor type 4 (megakaryocyte)     | -0.512 | 1.3E-02          |
| 208671_at    | <i>SERINC1</i>  | serine incorporator 1                                                 | -0.512 | 1.3E-02          |
| 1552426_a_at | <i>TM2D3</i>    | TM2 domain containing 3                                               | -0.512 | 1.3E-02          |
| 226018_at    | <i>C7orf41</i>  | chromosome 7 open reading frame 41                                    | -0.512 | 1.3E-02          |
| 242224_at    | <i>GPATCH2</i>  | G patch domain containing 2                                           | -0.512 | 1.3E-02          |
| 225009_at    | <i>CMTM4</i>    | CKLF-like MARVEL transmembrane domain containing 4                    | -0.512 | 1.3E-02          |
| 201781_s_at  | <i>AIP</i>      | aryl hydrocarbon receptor interacting protein                         | -0.512 | 1.3E-02          |
| 207103_at    | <i>KCND2</i>    | potassium voltage-gated channel, Shal-related subfamily, member 2     | -0.513 | 1.3E-02          |
| 210995_s_at  | <i>TRIM23</i>   | tripartite motif containing 23                                        | -0.513 | 1.3E-02          |
| 200787_s_at  | <i>PEA15</i>    | phosphoprotein enriched in astrocytes 15                              | -0.513 | 1.3E-02          |
| 227809_at    | <i>ZC3H6</i>    | zinc finger CCCH-type containing 6                                    | -0.513 | 1.3E-02          |
| 203381_s_at  | <i>APOE</i>     | apolipoprotein E                                                      | -0.513 | 1.2E-02          |
| 1558934_a_at | <i>GTF2H5</i>   | general transcription factor IIIH, polypeptide 5                      | -0.513 | 1.2E-02          |
| 227930_at    | <i>EIF2C4</i>   | eukaryotic translation initiation factor 2C, 4                        | -0.513 | 1.2E-02          |

| Probeset ID  | Gene symbol     | Gene description                                                                  | $\rho$ | Adjusted P-value |
|--------------|-----------------|-----------------------------------------------------------------------------------|--------|------------------|
| 202386_s_at  | <i>KIAA0430</i> | KIAA0430                                                                          | -0.514 | 1.2E-02          |
| 212310_at    | <i>MIA3</i>     | melanoma inhibitory activity family, member 3                                     | -0.514 | 1.2E-02          |
| 244623_at    | <i>KCNQ5</i>    | potassium voltage-gated channel, KQT-like subfamily, member 5                     | -0.514 | 1.2E-02          |
| 203006_at    | <i>INPP5A</i>   | inositol polyphosphate-5-phosphatase, 40kDa                                       | -0.514 | 1.2E-02          |
| 229664_at    | <i>MAPK8</i>    | mitogen-activated protein kinase 8                                                | -0.514 | 1.2E-02          |
| 238803_at    | <i>HECTD2</i>   | HECT domain containing E3 ubiquitin protein ligase 2                              | -0.515 | 1.2E-02          |
| 231840_x_at  | <i>LYRM7</i>    | Lyrm7 homolog (mouse)                                                             | -0.515 | 1.2E-02          |
| 226140_s_at  | <i>OTUD1</i>    | OTU domain containing 1                                                           | -0.515 | 1.2E-02          |
| 214157_at    | <i>GNAS</i>     | GNAS complex locus                                                                | -0.515 | 1.2E-02          |
| 200747_s_at  | <i>NUMA1</i>    | nuclear mitotic apparatus protein 1                                               | -0.515 | 1.2E-02          |
| 213623_at    | <i>KIF3A</i>    | kinesin family member 3A                                                          | -0.516 | 1.2E-02          |
| 213309_at    | <i>PLCL2</i>    | phospholipase C-like 2                                                            | -0.516 | 1.2E-02          |
| 210878_s_at  | <i>KDM3B</i>    | lysine (K)-specific demethylase 3B                                                | -0.516 | 1.2E-02          |
| 205529_s_at  | <i>RUNX1T1</i>  | runt-related transcription factor 1; translocated to, 1 (cyclin D-related)        | -0.516 | 1.2E-02          |
| 212677_s_at  | <i>CEP68</i>    | centrosomal protein 68kDa                                                         | -0.516 | 1.2E-02          |
| 201706_s_at  | <i>PEX19</i>    | peroxisomal biogenesis factor 19                                                  | -0.516 | 1.2E-02          |
| 235333_at    | <i>B4GALT6</i>  | UDP-Gal:betaGlcNAc beta 1,4- galactosyltransferase, polypeptide 6                 | -0.516 | 1.2E-02          |
| 224820_at    | <i>COX20</i>    | COX20 Cox2 chaperone homolog (S. cerevisiae)                                      | -0.517 | 1.2E-02          |
| 212678_at    | <i>NF1</i>      | neurofibromin 1                                                                   | -0.517 | 1.2E-02          |
| 212111_at    | <i>STX12</i>    | syntaxin 12                                                                       | -0.517 | 1.2E-02          |
| 229655_at    | <i>FAM19A5</i>  | family with sequence similarity 19 (chemokine (C-C motif)-like), member A5        | -0.517 | 1.2E-02          |
| 204062_s_at  | <i>ULK2</i>     | unc-51-like kinase 2 (C. elegans)                                                 | -0.517 | 1.2E-02          |
| 227536_at    | <i>ZC3H13</i>   | zinc finger CCCH-type containing 13                                               | -0.517 | 1.2E-02          |
| 229958_at    | <i>CLN8</i>     | ceroid-lipofuscinosis, neuronal 8 (epilepsy, progressive with mental retardation) | -0.517 | 1.2E-02          |
| 209112_at    | <i>CDKN1B</i>   | cyclin-dependent kinase inhibitor 1B (p27, Kip1)                                  | -0.517 | 1.2E-02          |
| 212943_at    | <i>KIAA0528</i> | KIAA0528                                                                          | -0.517 | 1.2E-02          |
| 224215_s_at  | <i>DLL1</i>     | delta-like 1 (Drosophila)                                                         | -0.517 | 1.2E-02          |
| 222111_at    | <i>FAM63B</i>   | family with sequence similarity 63, member B                                      | -0.518 | 1.1E-02          |
| 208953_at    | <i>LARP4B</i>   | La ribonucleoprotein domain family, member 4B                                     | -0.518 | 1.1E-02          |
| 212990_at    | <i>SYNJI</i>    | synaptojanin 1                                                                    | -0.518 | 1.1E-02          |
| 229459_at    | <i>FAM19A5</i>  | family with sequence similarity 19 (chemokine (C-C motif)-like), member A5        | -0.518 | 1.1E-02          |
| 230029_x_at  | <i>UBR3</i>     | ubiquitin protein ligase E3 component n-recognin 3 (putative)                     | -0.518 | 1.1E-02          |
| 1554806_a_at | <i>FBXO8</i>    | F-box protein 8                                                                   | -0.519 | 1.1E-02          |
| 211376_s_at  | <i>NSMCE4A</i>  | non-SMC element 4 homolog A (S. cerevisiae)                                       | -0.519 | 1.1E-02          |
| 213352_at    | <i>TMCC1</i>    | transmembrane and coiled-coil domain family 1                                     | -0.519 | 1.1E-02          |
| 223536_at    | <i>PSD2</i>     | pleckstrin and Sec7 domain containing 2                                           | -0.519 | 1.1E-02          |
| 212757_s_at  | <i>CAMK2G</i>   | calcium/calmodulin-dependent protein kinase II gamma                              | -0.519 | 1.1E-02          |
| 214680_at    | <i>NTRK2</i>    | neurotrophic tyrosine kinase, receptor, type 2                                    | -0.520 | 1.1E-02          |
| 235494_at    | <i>LSAMP</i>    | limbic system-associated membrane protein                                         | -0.520 | 1.1E-02          |
| 202777_at    | <i>SHOC2</i>    | soc-2 suppressor of clear homolog (C. elegans)                                    | -0.520 | 1.1E-02          |
| 230826_at    | <i>MMD2</i>     | monocyte to macrophage differentiation-associated 2                               | -0.520 | 1.1E-02          |
| 227094_at    | <i>DHTKD1</i>   | dehydrogenase E1 and transketolase domain containing 1                            | -0.520 | 1.1E-02          |
| 235048_at    | <i>FAM169A</i>  | family with sequence similarity 169, member A                                     | -0.520 | 1.1E-02          |

| Probeset ID  | Gene symbol     | Gene description                                             | $\rho$ | Adjusted P-value |
|--------------|-----------------|--------------------------------------------------------------|--------|------------------|
| 200940_s_at  | <i>RERE</i>     | arginine-glutamic acid dipeptide (RE) repeats                | -0.520 | 1.1E-02          |
| 214735_at    | <i>IPCEF1</i>   | interaction protein for cytohesin exchange factors 1         | -0.520 | 1.1E-02          |
| 228446_at    | <i>KIAA2026</i> | KIAA2026                                                     | -0.520 | 1.1E-02          |
| 223281_s_at  | <i>COX15</i>    | COX15 homolog, cytochrome c oxidase assembly protein (yeast) | -0.521 | 1.1E-02          |
| 238955_at    | <i>RFTN2</i>    | raftlin family member 2                                      | -0.521 | 1.1E-02          |
| 211937_at    | <i>EIF4B</i>    | eukaryotic translation initiation factor 4B                  | -0.521 | 1.1E-02          |
| 228680_at    | <i>KIF3A</i>    | kinesin family member 3A                                     | -0.521 | 1.1E-02          |
| 212850_s_at  | <i>LRP4</i>     | low density lipoprotein receptor-related protein 4           | -0.522 | 1.1E-02          |
| 226520_at    | <i>LCOR</i>     | ligand dependent nuclear receptor corepressor                | -0.522 | 1.1E-02          |
| 225497_at    | <i>ATE1</i>     | arginyltransferase 1                                         | -0.522 | 1.1E-02          |
| 228916_at    | <i>CWF19L2</i>  | CWF19-like 2, cell cycle control (S. pombe)                  | -0.522 | 1.1E-02          |
| 1561394_s_at | <i>KIAA1755</i> | KIAA1755                                                     | -0.523 | 1.1E-02          |
| 224366_s_at  | <i>REPS1</i>    | RALBP1 associated Eps domain containing 1                    | -0.523 | 1.1E-02          |
| 224150_s_at  | <i>CEP70</i>    | centrosomal protein 70kDa                                    | -0.523 | 1.1E-02          |
| 216195_at    | <i>ANK2</i>     | ankyrin 2, neuronal                                          | -0.523 | 1.0E-02          |
| 227896_at    | <i>BCCIP</i>    | BRCA2 and CDKN1A interacting protein                         | -0.523 | 1.0E-02          |
| 202259_s_at  | <i>N4BP2L2</i>  | NEDD4 binding protein 2-like 2                               | -0.523 | 1.0E-02          |
| 206183_s_at  | <i>HERC3</i>    | HECT and RLD domain containing E3 ubiquitin protein ligase 3 | -0.523 | 1.0E-02          |
| 224946_s_at  | <i>CCDC115</i>  | coiled-coil domain containing 115                            | -0.524 | 1.0E-02          |
| 227978_s_at  | <i>ZADH2</i>    | zinc binding alcohol dehydrogenase domain containing 2       | -0.524 | 1.0E-02          |
| 1565681_s_at | <i>DIP2C</i>    | DIP2 disco-interacting protein 2 homolog C (Drosophila)      | -0.524 | 1.0E-02          |
| 213133_s_at  | <i>GCSH</i>     | glycine cleavage system protein H (aminomethyl carrier)      | -0.524 | 1.0E-02          |
| 207232_s_at  | <i>DZIP3</i>    | DAZ interacting protein 3, zinc finger                       | -0.524 | 1.0E-02          |
| 227112_at    | <i>TMCC1</i>    | transmembrane and coiled-coil domain family 1                | -0.525 | 1.0E-02          |
| 211662_s_at  | <i>VDAC2</i>    | voltage-dependent anion channel 2                            | -0.525 | 1.0E-02          |
| 223059_s_at  | <i>FAM107B</i>  | family with sequence similarity 107, member B                | -0.525 | 1.0E-02          |
| 244008_at    | <i>PARP8</i>    | poly (ADP-ribose) polymerase family, member 8                | -0.525 | 1.0E-02          |
| 225066_at    | <i>PPP2R2D</i>  | protein phosphatase 2, regulatory subunit B, delta           | -0.525 | 1.0E-02          |
| 226623_at    | <i>PHYHIPL</i>  | phytanoyl-CoA 2-hydroxylase interacting protein-like         | -0.525 | 9.9E-03          |
| 232341_x_at  | <i>HABP4</i>    | hyaluronan binding protein 4                                 | -0.525 | 9.9E-03          |
| 231856_at    | <i>KIAA1244</i> | KIAA1244                                                     | -0.526 | 9.9E-03          |
| 61297_at     | <i>CASKIN2</i>  | CASK interacting protein 2                                   | -0.526 | 9.9E-03          |
| 212409_s_at  | <i>TOR1AIP1</i> | torsin A interacting protein 1                               | -0.526 | 9.9E-03          |
| 226151_x_at  | <i>CRYZL1</i>   | crystallin, zeta (quinone reductase)-like 1                  | -0.526 | 9.9E-03          |
| 208943_s_at  | <i>SEC62</i>    | SEC62 homolog (S. cerevisiae)                                | -0.526 | 9.9E-03          |
| 222983_s_at  | <i>PAIP2</i>    | poly(A) binding protein interacting protein 2                | -0.526 | 9.9E-03          |
| 203146_s_at  | <i>GABBR1</i>   | gamma-aminobutyric acid (GABA) B receptor, 1                 | -0.526 | 9.9E-03          |
| 221699_s_at  | <i>DDX50</i>    | DEAD (Asp-Glu-Ala-Asp) box polypeptide 50                    | -0.526 | 9.9E-03          |
| 203420_at    | <i>FAM8A1</i>   | family with sequence similarity 8, member A1                 | -0.526 | 9.9E-03          |
| 210554_s_at  | <i>CTBP2</i>    | C-terminal binding protein 2                                 | -0.526 | 9.9E-03          |
| 228170_at    | <i>OLIG1</i>    | oligodendrocyte transcription factor 1                       | -0.526 | 9.9E-03          |
| 223046_at    | <i>EGLN1</i>    | egl nine homolog 1 (C. elegans)                              | -0.527 | 9.8E-03          |
| 213392_at    | <i>IQCK</i>     | IQ motif containing K                                        | -0.527 | 9.8E-03          |
| 203526_s_at  | <i>APC</i>      | adenomatous polyposis coli                                   | -0.527 | 9.7E-03          |
| 229648_at    | <i>ARHGAP32</i> | Rho GTPase activating protein 32                             | -0.527 | 9.7E-03          |
| 209915_s_at  | <i>NRXN1</i>    | neurexin 1                                                   | -0.527 | 9.6E-03          |
| 227257_s_at  | <i>CACUL1</i>   | CDK2-associated, cullin domain 1                             | -0.527 | 9.6E-03          |



| Probeset ID  | Gene symbol     | Gene description                                                                  | $\rho$ | Adjusted P-value |
|--------------|-----------------|-----------------------------------------------------------------------------------|--------|------------------|
| 1557950_at   | <i>NEMF</i>     | nuclear export mediator factor                                                    | -0.527 | 9.6E-03          |
| 218142_s_at  | <i>CRBN</i>     | cereblon                                                                          | -0.528 | 9.6E-03          |
| 63305_at     | <i>PKNOX2</i>   | PBX/knotted 1 homeobox 2                                                          | -0.528 | 9.6E-03          |
| 212765_at    | <i>CAMSAP2</i>  | calmodulin regulated spectrin-associated protein family, member 2                 | -0.528 | 9.5E-03          |
| 223412_at    | <i>KBTBD7</i>   | kelch repeat and BTB (POZ) domain containing 7                                    | -0.528 | 9.5E-03          |
| 228380_at    | <i>SEN2</i>     | SUMO1/sentrin/SMT3 specific peptidase 2                                           | -0.528 | 9.5E-03          |
| 221498_at    | <i>SNX27</i>    | sorting nexin family member 27                                                    | -0.528 | 9.5E-03          |
| 202630_at    | <i>APPBP2</i>   | amyloid beta precursor protein (cytoplasmic tail) binding protein 2               | -0.528 | 9.5E-03          |
| 209702_at    | <i>FTO</i>      | fat mass and obesity associated                                                   | -0.528 | 9.5E-03          |
| 204156_at    | <i>SIK3</i>     | SIK family kinase 3                                                               | -0.528 | 9.5E-03          |
| 227132_at    | <i>ZNF706</i>   | zinc finger protein 706                                                           | -0.528 | 9.5E-03          |
| 228841_at    | <i>LYRM7</i>    | Lym7 homolog (mouse)                                                              | -0.528 | 9.5E-03          |
| 1557370_s_at | <i>MYCBP2</i>   | MYC binding protein 2, E3 ubiquitin protein ligase                                | -0.529 | 9.3E-03          |
| 204021_s_at  | <i>PURA</i>     | purine-rich element binding protein A                                             | -0.529 | 9.3E-03          |
| 202319_at    | <i>SEN6</i>     | SUMO1/sentrin specific peptidase 6                                                | -0.529 | 9.3E-03          |
| 227251_at    | <i>DCAF5</i>    | DDB1 and CUL4 associated factor 5                                                 | -0.529 | 9.3E-03          |
| 201829_at    | <i>NET1</i>     | neuroepithelial cell transforming 1                                               | -0.529 | 9.3E-03          |
| 213362_at    | <i>PTPRD</i>    | protein tyrosine phosphatase, receptor type, D                                    | -0.530 | 9.3E-03          |
| 214790_at    | <i>SEN6</i>     | SUMO1/sentrin specific peptidase 6                                                | -0.530 | 9.3E-03          |
| 213922_at    | <i>TTBK2</i>    | tau tubulin kinase 2                                                              | -0.530 | 9.2E-03          |
| 1554627_a_at | <i>ASCC1</i>    | activating signal cointegrator 1 complex subunit 1                                | -0.530 | 9.2E-03          |
| 233919_s_at  | <i>HABP4</i>    | hyaluronan binding protein 4                                                      | -0.530 | 9.2E-03          |
| 235309_at    | <i>RPS15A</i>   | ribosomal protein S15a                                                            | -0.530 | 9.2E-03          |
| 200946_x_at  | <i>GLUD1</i>    | glutamate dehydrogenase 1                                                         | -0.530 | 9.2E-03          |
| 38892_at     | <i>KIAA0240</i> | KIAA0240                                                                          | -0.530 | 9.1E-03          |
| 203249_at    | <i>EZH1</i>     | enhancer of zeste homolog 1 (Drosophila)                                          | -0.531 | 9.1E-03          |
| 203839_s_at  | <i>TNK2</i>     | tyrosine kinase, non-receptor, 2                                                  | -0.531 | 9.0E-03          |
| 221430_s_at  | <i>RNF146</i>   | ring finger protein 146                                                           | -0.531 | 9.0E-03          |
| 212530_at    | <i>NEK7</i>     | NIMA (never in mitosis gene a)-related kinase 7                                   | -0.531 | 9.0E-03          |
| 1553765_a_at | <i>KLHL32</i>   | kelch-like 32 (Drosophila)                                                        | -0.531 | 8.9E-03          |
| 227416_s_at  | <i>ZCRB1</i>    | zinc finger CCHC-type and RNA binding motif 1                                     | -0.532 | 8.9E-03          |
| 222737_s_at  | <i>BRD7</i>     | bromodomain containing 7                                                          | -0.532 | 8.9E-03          |
| 223119_s_at  | <i>USP47</i>    | ubiquitin specific peptidase 47                                                   | -0.532 | 8.9E-03          |
| 225658_at    | <i>SPOPL</i>    | speckle-type POZ protein-like                                                     | -0.532 | 8.9E-03          |
| 1555141_a_at | <i>SLC9B1</i>   | solute carrier family 9, subfamily B (NHA1, cation proton antiporter 1), member 1 | -0.532 | 8.8E-03          |
| 232136_s_at  | <i>CTTNBP2</i>  | cortactin binding protein 2                                                       | -0.532 | 8.8E-03          |
| 215785_s_at  | <i>CYFIP2</i>   | cytoplasmic FMR1 interacting protein 2                                            | -0.532 | 8.8E-03          |
| 241739_at    | <i>OGFOD1</i>   | 2-oxoglutarate and iron-dependent oxygenase domain containing 1                   | -0.533 | 8.7E-03          |
| 209066_x_at  | <i>UQCRB</i>    | ubiquinol-cytochrome c reductase binding protein                                  | -0.533 | 8.7E-03          |
| 211600_at    | <i>PTPRO</i>    | protein tyrosine phosphatase, receptor type, O                                    | -0.533 | 8.7E-03          |
| 214318_s_at  | <i>FRY</i>      | furry homolog (Drosophila)                                                        | -0.533 | 8.7E-03          |
| 209257_s_at  | <i>SMC3</i>     | structural maintenance of chromosomes 3                                           | -0.533 | 8.7E-03          |
| 204633_s_at  | <i>RPS6KA5</i>  | ribosomal protein S6 kinase, 90kDa, polypeptide 5                                 | -0.533 | 8.7E-03          |
| 222516_at    | <i>AP3M1</i>    | adaptor-related protein complex 3, mu 1 subunit                                   | -0.533 | 8.7E-03          |
| 225429_at    | <i>PPP6C</i>    | protein phosphatase 6, catalytic subunit                                          | -0.534 | 8.6E-03          |

| Probeset ID  | Gene symbol     | Gene description                                                                        | $\rho$ | Adjusted P-value |
|--------------|-----------------|-----------------------------------------------------------------------------------------|--------|------------------|
| 212455_at    | <i>YTHDC1</i>   | YTH domain containing 1                                                                 | -0.534 | 8.6E-03          |
| 212609_s_at  | <i>AKT3</i>     | v-akt murine thymoma viral oncogene homolog 3 (protein kinase B, gamma)                 | -0.534 | 8.6E-03          |
| 224998_at    | <i>CMTM4</i>    | CKLF-like MARVEL transmembrane domain containing 4                                      | -0.534 | 8.6E-03          |
| 226748_at    | <i>LYSMD2</i>   | LysM, putative peptidoglycan-binding, domain containing 2                               | -0.534 | 8.6E-03          |
| 214787_at    | <i>DENND4A</i>  | DENN/MADD domain containing 4A                                                          | -0.534 | 8.6E-03          |
| 228062_at    | <i>NAPIL5</i>   | nucleosome assembly protein 1-like 5                                                    | -0.534 | 8.5E-03          |
| 244293_at    | <i>UQCRCB</i>   | ubiquinol-cytochrome c reductase binding protein                                        | -0.535 | 8.5E-03          |
| 238490_at    | <i>KIAA2026</i> | KIAA2026                                                                                | -0.535 | 8.4E-03          |
| 225915_at    | <i>CAB39L</i>   | calcium binding protein 39-like                                                         | -0.535 | 8.3E-03          |
| 228561_at    | <i>CDC37L1</i>  | cell division cycle 37 homolog (S. cerevisiae)-like 1                                   | -0.535 | 8.3E-03          |
| 209582_s_at  | <i>CD200</i>    | CD200 molecule                                                                          | -0.535 | 8.3E-03          |
| 212880_at    | <i>WDR7</i>     | WD repeat domain 7                                                                      | -0.535 | 8.3E-03          |
| 242569_at    | <i>STAM2</i>    | signal transducing adaptor molecule (SH3 domain and ITAM motif) 2                       | -0.535 | 8.3E-03          |
| 219279_at    | <i>DOCK10</i>   | dedicator of cytokinesis 10                                                             | -0.536 | 8.2E-03          |
| 207091_at    | <i>P2RX7</i>    | purinergic receptor P2X, ligand-gated ion channel, 7                                    | -0.536 | 8.1E-03          |
| 212306_at    | <i>CLASP2</i>   | cytoplasmic linker associated protein 2                                                 | -0.537 | 8.1E-03          |
| 218970_s_at  | <i>CUTC</i>     | cutC copper transporter homolog (E. coli)                                               | -0.537 | 8.1E-03          |
| 223438_s_at  | <i>PPARA</i>    | peroxisome proliferator-activated receptor alpha                                        | -0.537 | 8.1E-03          |
| 204762_s_at  | <i>GNAO1</i>    | guanine nucleotide binding protein (G protein), alpha activating activity polypeptide O | -0.537 | 8.1E-03          |
| 227599_at    | <i>MB21D2</i>   | Mab-21 domain containing 2                                                              | -0.537 | 8.1E-03          |
| 228376_at    | <i>GGTAIP</i>   | glycoprotein, alpha-galactosyltransferase 1 pseudogene                                  | -0.537 | 8.1E-03          |
| 235024_at    | <i>PHF17</i>    | PHD finger protein 17                                                                   | -0.537 | 8.1E-03          |
| 235264_at    | <i>HCFC2</i>    | host cell factor C2                                                                     | -0.537 | 8.1E-03          |
| 228063_s_at  | <i>NAPIL5</i>   | nucleosome assembly protein 1-like 5                                                    | -0.537 | 8.0E-03          |
| 202079_s_at  | <i>TRAK1</i>    | trafficking protein, kinesin binding 1                                                  | -0.537 | 8.0E-03          |
| 230056_at    | <i>BPTF</i>     | bromodomain PHD finger transcription factor                                             | -0.537 | 8.0E-03          |
| 230942_at    | <i>CMTM5</i>    | CKLF-like MARVEL transmembrane domain containing 5                                      | -0.538 | 8.0E-03          |
| 231358_at    | <i>MRO</i>      | maestro                                                                                 | -0.538 | 8.0E-03          |
| 211203_s_at  | <i>CNTN1</i>    | contactin 1                                                                             | -0.538 | 8.0E-03          |
| 202742_s_at  | <i>PRKACB</i>   | protein kinase, cAMP-dependent, catalytic, beta                                         | -0.538 | 8.0E-03          |
| 204284_at    | <i>PPP1R3C</i>  | protein phosphatase 1, regulatory subunit 3C                                            | -0.538 | 8.0E-03          |
| 210471_s_at  | <i>KCNAB1</i>   | potassium voltage-gated channel, shaker-related subfamily, beta member 1                | -0.538 | 8.0E-03          |
| 225334_at    | <i>C10orf32</i> | chromosome 10 open reading frame 32                                                     | -0.538 | 8.0E-03          |
| 226500_at    | <i>ZBTB47</i>   | zinc finger and BTB domain containing 47                                                | -0.538 | 8.0E-03          |
| 244783_at    | <i>YAF2</i>     | YY1 associated factor 2                                                                 | -0.539 | 7.9E-03          |
| 1569107_s_at | <i>ZNF642</i>   | zinc finger protein 642                                                                 | -0.539 | 7.9E-03          |
| 222517_at    | <i>AP3M1</i>    | adaptor-related protein complex 3, mu 1 subunit                                         | -0.539 | 7.9E-03          |
| 207797_s_at  | <i>LRP2BP</i>   | LRP2 binding protein                                                                    | -0.539 | 7.8E-03          |
| 225048_at    | <i>PHF10</i>    | PHD finger protein 10                                                                   | -0.539 | 7.8E-03          |
| 211383_s_at  | <i>WDR37</i>    | WD repeat domain 37                                                                     | -0.539 | 7.8E-03          |
| 225884_s_at  | <i>GZFI</i>     | GDNF-inducible zinc finger protein 1                                                    | -0.539 | 7.8E-03          |
| 202011_at    | <i>TJPI</i>     | tight junction protein 1 (zona occludens 1)                                             | -0.540 | 7.7E-03          |
| 212928_at    | <i>TSPYL4</i>   | TSPY-like 4                                                                             | -0.540 | 7.7E-03          |

| Probeset ID  | Gene symbol       | Gene description                                                               | $\rho$ | Adjusted P-value |
|--------------|-------------------|--------------------------------------------------------------------------------|--------|------------------|
| 225886_at    | <i>DDX5</i>       | DEAD (Asp-Glu-Ala-Asp) box helicase 5                                          | -0.540 | 7.7E-03          |
| 209300_s_at  | <i>NECAP1</i>     | NECAP endocytosis associated 1                                                 | -0.540 | 7.7E-03          |
| 210110_x_at  | <i>HNRNPH3</i>    | heterogeneous nuclear ribonucleoprotein H3 (2H9)                               | -0.540 | 7.7E-03          |
| 225086_at    | <i>FAM98B</i>     | family with sequence similarity 98, member B                                   | -0.540 | 7.7E-03          |
| 1552727_s_at | <i>ADAMTS17</i>   | ADAM metallopeptidase with thrombospondin type 1 motif, 17                     | -0.540 | 7.7E-03          |
| 203188_at    | <i>B3GNT1</i>     | UDP-GlcNAc:betaGal beta-1,3-N-acetylglucosaminyltransferase 1                  | -0.540 | 7.7E-03          |
| 230821_at    | <i>ZNF148</i>     | zinc finger protein 148                                                        | -0.540 | 7.7E-03          |
| 1563475_s_at | <i>METTL20</i>    | methyltransferase like 20                                                      | -0.541 | 7.7E-03          |
| 221082_s_at  | <i>NDRG3</i>      | NDRG family member 3                                                           | -0.541 | 7.6E-03          |
| 205420_at    | <i>PEX7</i>       | peroxisomal biogenesis factor 7                                                | -0.541 | 7.6E-03          |
| 226855_at    | <i>PDP2</i>       | pyruvate dehydrogenase phosphatase catalytic subunit 2                         | -0.541 | 7.6E-03          |
| 235405_at    | <i>GSTA4</i>      | glutathione S-transferase alpha 4                                              | -0.541 | 7.6E-03          |
| 201335_s_at  | <i>ARHGEF12</i>   | Rho guanine nucleotide exchange factor (GEF) 12                                | -0.541 | 7.6E-03          |
| 215992_s_at  | <i>RAPGEF2</i>    | Rap guanine nucleotide exchange factor (GEF) 2                                 | -0.542 | 7.5E-03          |
| 218723_s_at  | <i>RGCC</i>       | regulator of cell cycle                                                        | -0.542 | 7.5E-03          |
| 226234_at    | <i>GDF11</i>      | growth differentiation factor 11                                               | -0.542 | 7.5E-03          |
| 208611_s_at  | <i>SPTAN1</i>     | spectrin, alpha, non-erythrocytic 1                                            | -0.542 | 7.4E-03          |
| 208732_at    | <i>RAB2A</i>      | RAB2A, member RAS oncogene family                                              | -0.542 | 7.4E-03          |
| 238794_at    | <i>SFR1</i>       | SWI5-dependent recombination repair 1                                          | -0.542 | 7.4E-03          |
| 226751_at    | <i>CNRIP1</i>     | cannabinoid receptor interacting protein 1                                     | -0.543 | 7.4E-03          |
| 219800_s_at  | <i>THNSL1</i>     | threonine synthase-like 1 (S. cerevisiae)                                      | -0.543 | 7.3E-03          |
| 212079_s_at  | <i>MLL</i>        | myeloid/lymphoid or mixed-lineage leukemia (trithorax homolog, Drosophila)     | -0.543 | 7.3E-03          |
| 213266_at    | <i>TUBGCP4</i>    | Tubulin, gamma complex associated protein 4                                    | -0.543 | 7.3E-03          |
| 235111_at    | <i>LSAMP</i>      | limbic system-associated membrane protein                                      | -0.543 | 7.3E-03          |
| 221922_at    | <i>GPSM2</i>      | G-protein signaling modulator 2                                                | -0.543 | 7.3E-03          |
| 212760_at    | <i>UBR2</i>       | ubiquitin protein ligase E3 component n-recognin 2                             | -0.544 | 7.2E-03          |
| 228581_at    | <i>KCNJ10</i>     | potassium inwardly-rectifying channel, subfamily J, member 10                  | -0.544 | 7.2E-03          |
| 201174_s_at  | <i>TERF2IP</i>    | telomeric repeat binding factor 2, interacting protein                         | -0.544 | 7.2E-03          |
| 220391_at    | <i>ZBTB3</i>      | zinc finger and BTB domain containing 3                                        | -0.544 | 7.2E-03          |
| 212693_at    | <i>MDN1</i>       | MDN1, midasin homolog (yeast)                                                  | -0.544 | 7.2E-03          |
| 1555469_a_at | <i>CLASP2</i>     | cytoplasmic linker associated protein 2                                        | -0.544 | 7.2E-03          |
| 219049_at    | <i>CSGALNACT1</i> | chondroitin sulfate N-acetylgalactosaminyltransferase 1                        | -0.544 | 7.1E-03          |
| 212425_at    | <i>SCAMP1</i>     | secretory carrier membrane protein 1                                           | -0.544 | 7.1E-03          |
| 240806_at    | <i>RPL15</i>      | Ribosomal protein L15                                                          | -0.544 | 7.1E-03          |
| 228218_at    | <i>LSAMP</i>      | limbic system-associated membrane protein                                      | -0.545 | 7.1E-03          |
| 228228_at    | <i>DACT3</i>      | dapper, antagonist of beta-catenin, homolog 3 (Xenopus laevis)                 | -0.545 | 7.1E-03          |
| 212793_at    | <i>DAAM2</i>      | dishevelled associated activator of morphogenesis 2                            | -0.545 | 7.1E-03          |
| 1569349_at   | <i>C11orf30</i>   | chromosome 11 open reading frame 30                                            | -0.545 | 7.1E-03          |
| 235635_at    | <i>ARHGAP5</i>    | Rho GTPase activating protein 5                                                | -0.545 | 7.1E-03          |
| 208666_s_at  | <i>STI3</i>       | suppression of tumorigenicity 13 (colon carcinoma) (Hsp70 interacting protein) | -0.545 | 7.0E-03          |
| 211475_s_at  | <i>BAG1</i>       | BCL2-associated athanogene                                                     | -0.545 | 7.0E-03          |
| 242255_at    | <i>WDR37</i>      | WD repeat domain 37                                                            | -0.545 | 7.0E-03          |
| 228906_at    | <i>TET1</i>       | tet methylcytosine dioxygenase 1                                               | -0.546 | 7.0E-03          |
| 229676_at    | <i>MTPAP</i>      | Mitochondrial poly(A) polymerase                                               | -0.546 | 7.0E-03          |

| Probeset ID  | Gene symbol      | Gene description                                                        | $\rho$ | Adjusted P-value |
|--------------|------------------|-------------------------------------------------------------------------|--------|------------------|
| 229414_at    | <i>PITPNC1</i>   | phosphatidylinositol transfer protein, cytoplasmic 1                    | -0.546 | 7.0E-03          |
| 210625_s_at  | <i>AKAP1</i>     | A kinase (PRKA) anchor protein 1                                        | -0.546 | 7.0E-03          |
| 212731_at    | <i>ANKRD46</i>   | ankyrin repeat domain 46                                                | -0.546 | 7.0E-03          |
| 226779_at    | <i>LMBRD2</i>    | LMBR1 domain containing 2                                               | -0.546 | 7.0E-03          |
| 204476_s_at  | <i>PC</i>        | pyruvate carboxylase                                                    | -0.546 | 7.0E-03          |
| 212719_at    | <i>PHLPP1</i>    | PH domain and leucine rich repeat protein phosphatase 1                 | -0.546 | 7.0E-03          |
| 239024_at    | <i>ZNF148</i>    | zinc finger protein 148                                                 | -0.546 | 7.0E-03          |
| 214251_s_at  | <i>NUMA1</i>     | nuclear mitotic apparatus protein 1                                     | -0.547 | 6.9E-03          |
| 225729_at    | <i>C6orf89</i>   | chromosome 6 open reading frame 89                                      | -0.547 | 6.9E-03          |
| 209002_s_at  | <i>CALCOCO1</i>  | calcium binding and coiled-coil domain 1                                | -0.547 | 6.9E-03          |
| 219547_at    | <i>COX15</i>     | COX15 homolog, cytochrome c oxidase assembly protein (yeast)            | -0.547 | 6.9E-03          |
| 202650_s_at  | <i>KIAA0195</i>  | KIAA0195                                                                | -0.547 | 6.9E-03          |
| 211951_at    | <i>NOLC1</i>     | nucleolar and coiled-body phosphoprotein 1                              | -0.548 | 6.8E-03          |
| 223507_at    | <i>CLPX</i>      | ClpX caseinolytic peptidase X homolog (E. coli)                         | -0.548 | 6.8E-03          |
| 201711_x_at  | <i>RANBP2</i>    | RAN binding protein 2                                                   | -0.548 | 6.8E-03          |
| 1554767_s_at | <i>CRYZL1</i>    | crystallin, zeta (quinone reductase)-like 1                             | -0.548 | 6.8E-03          |
| 209111_at    | <i>RNF5</i>      | ring finger protein 5, E3 ubiquitin protein ligase                      | -0.548 | 6.7E-03          |
| 209916_at    | <i>DHTKD1</i>    | dehydrogenase E1 and transketolase domain containing 1                  | -0.548 | 6.7E-03          |
| 207093_s_at  | <i>OMG</i>       | oligodendrocyte myelin glycoprotein                                     | -0.548 | 6.7E-03          |
| 226106_at    | <i>RNF141</i>    | ring finger protein 141                                                 | -0.549 | 6.7E-03          |
| 204155_s_at  | <i>SIK3</i>      | SIK family kinase 3                                                     | -0.549 | 6.7E-03          |
| 204020_at    | <i>PURA</i>      | purine-rich element binding protein A                                   | -0.549 | 6.7E-03          |
| 227605_at    | <i>AIMP1</i>     | aminoacyl tRNA synthetase complex-interacting multifunctional protein 1 | -0.549 | 6.6E-03          |
| 222941_at    | <i>USP46</i>     | ubiquitin specific peptidase 46                                         | -0.549 | 6.6E-03          |
| 205104_at    | <i>SNPH</i>      | syntaphilin                                                             | -0.550 | 6.6E-03          |
| 201599_at    | <i>OAT</i>       | ornithine aminotransferase                                              | -0.550 | 6.6E-03          |
| 212598_at    | <i>WDFY3</i>     | WD repeat and FYVE domain containing 3                                  | -0.550 | 6.6E-03          |
| 201718_s_at  | <i>EPB41L2</i>   | erythrocyte membrane protein band 4.1-like 2                            | -0.550 | 6.5E-03          |
| 218097_s_at  | <i>CUEDC2</i>    | CUE domain containing 2                                                 | -0.550 | 6.5E-03          |
| 238818_at    | <i>KIAA1429</i>  | KIAA1429                                                                | -0.550 | 6.5E-03          |
| 212655_at    | <i>ZCCHC14</i>   | zinc finger, CCHC domain containing 14                                  | -0.550 | 6.5E-03          |
| 223058_at    | <i>FAM107B</i>   | family with sequence similarity 107, member B                           | -0.550 | 6.5E-03          |
| 229497_at    | <i>ANKDD1A</i>   | ankyrin repeat and death domain containing 1A                           | -0.550 | 6.5E-03          |
| 204100_at    | <i>THRA</i>      | thyroid hormone receptor, alpha                                         | -0.551 | 6.5E-03          |
| 218528_s_at  | <i>RNF38</i>     | ring finger protein 38                                                  | -0.551 | 6.5E-03          |
| 1556061_at   | <i>RPP30</i>     | ribonuclease P/MRP 30kDa subunit                                        | -0.551 | 6.5E-03          |
| 221508_at    | <i>TAOK3</i>     | TAO kinase 3                                                            | -0.551 | 6.5E-03          |
| 212779_at    | <i>KIAA1109</i>  | KIAA1109                                                                | -0.551 | 6.4E-03          |
| 226443_at    | <i>FAM122A</i>   | family with sequence similarity 122A                                    | -0.551 | 6.4E-03          |
| 225550_at    | <i>CNST</i>      | consortin, connexin sorting protein                                     | -0.551 | 6.4E-03          |
| 218761_at    | <i>RNF111</i>    | ring finger protein 111                                                 | -0.552 | 6.4E-03          |
| 218935_at    | <i>EHD3</i>      | EH-domain containing 3                                                  | -0.552 | 6.4E-03          |
| 224622_at    | <i>TBC1D14</i>   | TBC1 domain family, member 14                                           | -0.552 | 6.4E-03          |
| 238569_at    | <i>GABBR1</i>    | gamma-aminobutyric acid (GABA) B receptor, 1                            | -0.552 | 6.4E-03          |
| 209914_s_at  | <i>NRXN1</i>     | neurexin 1                                                              | -0.552 | 6.3E-03          |
| 213218_at    | <i>ZNF187</i>    | zinc finger protein 187                                                 | -0.552 | 6.3E-03          |
| 208868_s_at  | <i>GABARAPL1</i> | GABA(A) receptor-associated protein like 1                              | -0.552 | 6.3E-03          |

| Probeset ID  | Gene symbol      | Gene description                                                                                  | $\rho$ | Adjusted P-value |
|--------------|------------------|---------------------------------------------------------------------------------------------------|--------|------------------|
| 225840_at    | <i>TEF</i>       | thyrotrophic embryonic factor                                                                     | -0.552 | 6.3E-03          |
| 219643_at    | <i>LRP1B</i>     | low density lipoprotein receptor-related protein 1B                                               | -0.553 | 6.3E-03          |
| 227977_at    | <i>ZADH2</i>     | zinc binding alcohol dehydrogenase domain containing 2                                            | -0.553 | 6.3E-03          |
| 209019_s_at  | <i>PINK1</i>     | PTEN induced putative kinase 1                                                                    | -0.553 | 6.3E-03          |
| 212427_at    | <i>KIAA0368</i>  | KIAA0368                                                                                          | -0.553 | 6.3E-03          |
| 202457_s_at  | <i>PPP3CA</i>    | protein phosphatase 3, catalytic subunit, alpha isozyme                                           | -0.553 | 6.3E-03          |
| 226104_at    | <i>RNF170</i>    | ring finger protein 170                                                                           | -0.553 | 6.3E-03          |
| 228017_s_at  | <i>NKAIN4</i>    | Na <sup>+</sup> /K <sup>+</sup> transporting ATPase interacting 4                                 | -0.554 | 6.2E-03          |
| 224781_s_at  | <i>RBM17</i>     | RNA binding motif protein 17                                                                      | -0.554 | 6.2E-03          |
| 225064_at    | <i>RABEP1</i>    | rabaptin, RAB GTPase binding effector protein 1                                                   | -0.554 | 6.2E-03          |
| 203883_s_at  | <i>RAB11FIP2</i> | RAB11 family interacting protein 2 (class I)                                                      | -0.554 | 6.2E-03          |
| 208740_at    | <i>SAP18</i>     | Sin3A-associated protein, 18kDa                                                                   | -0.554 | 6.1E-03          |
| 201320_at    | <i>SMARCC2</i>   | SWI/SNF related, matrix associated, actin dependent regulator of chromatin, subfamily c, member 2 | -0.554 | 6.1E-03          |
| 217896_s_at  | <i>FAM192A</i>   | family with sequence similarity 192, member A                                                     | -0.554 | 6.1E-03          |
| 225446_at    | <i>BRWD1</i>     | bromodomain and WD repeat domain containing 1                                                     | -0.554 | 6.1E-03          |
| 215945_s_at  | <i>TRIM2</i>     | tripartite motif containing 2                                                                     | -0.554 | 6.1E-03          |
| 220345_at    | <i>LRRTM4</i>    | leucine rich repeat transmembrane neuronal 4                                                      | -0.554 | 6.1E-03          |
| 237094_at    | <i>FAM19A5</i>   | family with sequence similarity 19 (chemokine (C-C motif)-like), member A5                        | -0.554 | 6.1E-03          |
| 228006_at    | <i>PTEN</i>      | phosphatase and tensin homolog                                                                    | -0.555 | 6.1E-03          |
| 209864_at    | <i>FRAT2</i>     | frequently rearranged in advanced T-cell lymphomas 2                                              | -0.555 | 6.1E-03          |
| 226345_at    | <i>ARL5B</i>     | ADP-ribosylation factor-like 5B                                                                   | -0.555 | 6.1E-03          |
| 209259_s_at  | <i>SMC3</i>      | structural maintenance of chromosomes 3                                                           | -0.555 | 6.1E-03          |
| 235227_at    | <i>STXBP5</i>    | syntaxin binding protein 5 (tomosyn)                                                              | -0.555 | 6.1E-03          |
| 1560814_a_at | <i>C15orf57</i>  | chromosome 15 open reading frame 57                                                               | -0.555 | 6.0E-03          |
| 212309_at    | <i>CLASP2</i>    | cytoplasmic linker associated protein 2                                                           | -0.556 | 6.0E-03          |
| 1564002_a_at | <i>AKD1</i>      | adenylate kinase domain containing 1                                                              | -0.556 | 6.0E-03          |
| 202967_at    | <i>GSTA4</i>     | glutathione S-transferase alpha 4                                                                 | -0.556 | 6.0E-03          |
| 200898_s_at  | <i>MGEA5</i>     | meningioma expressed antigen 5 (hyaluronidase)                                                    | -0.556 | 6.0E-03          |
| 227401_at    | <i>IL17D</i>     | interleukin 17D                                                                                   | -0.556 | 6.0E-03          |
| 230129_at    | <i>PSTK</i>      | phosphoseryl-tRNA kinase                                                                          | -0.556 | 6.0E-03          |
| 215235_at    | <i>SPTAN1</i>    | spectrin, alpha, non-erythrocytic 1                                                               | -0.556 | 5.9E-03          |
| 206689_x_at  | <i>KAT5</i>      | K(lysine) acetyltransferase 5                                                                     | -0.557 | 5.9E-03          |
| 243843_at    | <i>N4BP2L1</i>   | NEDD4 binding protein 2-like 1                                                                    | -0.557 | 5.9E-03          |
| 203584_at    | <i>EMC2</i>      | ER membrane protein complex subunit 2                                                             | -0.557 | 5.9E-03          |
| 212124_at    | <i>ZMIZ1</i>     | zinc finger, MIZ-type containing 1                                                                | -0.557 | 5.8E-03          |
| 224652_at    | <i>CCNY</i>      | cyclin Y                                                                                          | -0.558 | 5.8E-03          |
| 226280_at    | <i>BNIP2</i>     | BCL2/adenovirus E1B 19kDa interacting protein 2                                                   | -0.558 | 5.8E-03          |
| 221550_at    | <i>COX15</i>     | COX15 homolog, cytochrome c oxidase assembly protein (yeast)                                      | -0.558 | 5.8E-03          |
| 201807_at    | <i>VPS26A</i>    | vacuolar protein sorting 26 homolog A (S. pombe)                                                  | -0.558 | 5.8E-03          |
| 218976_at    | <i>DNAJC12</i>   | DnaJ (Hsp40) homolog, subfamily C, member 12                                                      | -0.558 | 5.7E-03          |
| 203631_s_at  | <i>GPRC5B</i>    | G protein-coupled receptor, family C, group 5, member B                                           | -0.558 | 5.7E-03          |
| 209982_s_at  | <i>NRXN2</i>     | neurexin 2                                                                                        | -0.558 | 5.7E-03          |
| 209460_at    | <i>ABAT</i>      | 4-aminobutyrate aminotransferase                                                                  | -0.558 | 5.7E-03          |
| 221588_x_at  | <i>ALDH6A1</i>   | aldehyde dehydrogenase 6 family, member A1                                                        | -0.559 | 5.7E-03          |
| 205259_at    | <i>NR3C2</i>     | nuclear receptor subfamily 3, group C, member 2                                                   | -0.559 | 5.6E-03          |
| 218228_s_at  | <i>TNKS2</i>     | tankyrase, TRF1-interacting ankyrin-related ADP-ribose                                            | -0.559 | 5.6E-03          |

| Probeset ID | Gene symbol      | Gene description                                                       | $\rho$ | Adjusted P-value |
|-------------|------------------|------------------------------------------------------------------------|--------|------------------|
|             |                  | polymerase 2                                                           |        |                  |
| 232226_at   | <i>LRRC4C</i>    | leucine rich repeat containing 4C                                      | -0.559 | 5.6E-03          |
| 205279_s_at | <i>GLRB</i>      | glycine receptor, beta                                                 | -0.559 | 5.6E-03          |
| 209311_at   | <i>BCL2L2</i>    | BCL2-like 2                                                            | -0.559 | 5.6E-03          |
| 224662_at   | <i>KIF5B</i>     | kinesin family member 5B                                               | -0.559 | 5.6E-03          |
| 226648_at   | <i>HIF1AN</i>    | hypoxia inducible factor 1, alpha subunit inhibitor                    | -0.559 | 5.6E-03          |
| 226366_at   | <i>SHPRH</i>     | SNF2 histone linker PHD RING helicase, E3 ubiquitin protein ligase     | -0.559 | 5.6E-03          |
| 238472_at   | <i>FBXO9</i>     | F-box protein 9                                                        | -0.559 | 5.6E-03          |
| 228695_at   | <i>C8orf46</i>   | chromosome 8 open reading frame 46                                     | -0.560 | 5.6E-03          |
| 234977_at   | <i>ZADH2</i>     | zinc binding alcohol dehydrogenase domain containing 2                 | -0.560 | 5.6E-03          |
| 235345_at   | <i>RUFY2</i>     | RUN and FYVE domain containing 2                                       | -0.560 | 5.6E-03          |
| 203853_s_at | <i>GAB2</i>      | GRB2-associated binding protein 2                                      | -0.560 | 5.5E-03          |
| 204067_at   | <i>SUOX</i>      | sulfite oxidase                                                        | -0.560 | 5.5E-03          |
| 229312_s_at | <i>GKAP1</i>     | G kinase anchoring protein 1                                           | -0.561 | 5.5E-03          |
| 200788_s_at | <i>PEA15</i>     | phosphoprotein enriched in astrocytes 15                               | -0.561 | 5.5E-03          |
| 201988_s_at | <i>CREBL2</i>    | cAMP responsive element binding protein-like 2                         | -0.561 | 5.5E-03          |
| 225405_at   | <i>HNRNPUL2</i>  | heterogeneous nuclear ribonucleoprotein U-like 2                       | -0.561 | 5.5E-03          |
| 226712_at   | <i>SSRI</i>      | signal sequence receptor, alpha                                        | -0.562 | 5.4E-03          |
| 220753_s_at | <i>CRYL1</i>     | crystallin, lambda 1                                                   | -0.562 | 5.4E-03          |
| 225426_at   | <i>PPP6C</i>     | protein phosphatase 6, catalytic subunit                               | -0.562 | 5.4E-03          |
| 239300_at   | <i>PIK3C3</i>    | phosphoinositide-3-kinase, class 3                                     | -0.562 | 5.4E-03          |
| 213118_at   | <i>UHRF1BP1L</i> | UHRF1 binding protein 1-like                                           | -0.562 | 5.3E-03          |
| 203884_s_at | <i>RAB11FIP2</i> | RAB11 family interacting protein 2 (class I)                           | -0.563 | 5.3E-03          |
| 202794_at   | <i>INPP1</i>     | inositol polyphosphate-1-phosphatase                                   | -0.563 | 5.2E-03          |
| 208939_at   | <i>SEPHS1</i>    | selenophosphate synthetase 1                                           | -0.563 | 5.2E-03          |
| 209860_s_at | <i>ANXA7</i>     | annexin A7                                                             | -0.563 | 5.2E-03          |
| 226326_at   | <i>PCGF5</i>     | polycomb group ring finger 5                                           | -0.563 | 5.2E-03          |
| 230668_at   | <i>NKAIN4</i>    | Na <sup>+</sup> /K <sup>+</sup> transporting ATPase interacting 4      | -0.564 | 5.2E-03          |
| 228289_at   | <i>BRD7</i>      | bromodomain containing 7                                               | -0.564 | 5.2E-03          |
| 35846_at    | <i>THRA</i>      | thyroid hormone receptor, alpha                                        | -0.564 | 5.2E-03          |
| 225504_at   | <i>HMBOX1</i>    | homeobox containing 1                                                  | -0.564 | 5.1E-03          |
| 203657_s_at | <i>CTSF</i>      | cathepsin F                                                            | -0.564 | 5.1E-03          |
| 226258_at   | <i>AMN1</i>      | antagonist of mitotic exit network 1 homolog (S. cerevisiae)           | -0.564 | 5.1E-03          |
| 222820_at   | <i>TNRC6C</i>    | trinucleotide repeat containing 6C                                     | -0.564 | 5.1E-03          |
| 221824_s_at | <i>MARCH8</i>    | membrane-associated ring finger (C3HC4) 8, E3 ubiquitin protein ligase | -0.565 | 5.1E-03          |
| 219701_at   | <i>TMOD2</i>     | tropomodulin 2 (neuronal)                                              | -0.565 | 5.1E-03          |
| 243219_x_at | <i>MRPL50</i>    | mitochondrial ribosomal protein L50                                    | -0.565 | 5.1E-03          |
| 209379_s_at | <i>FAM190B</i>   | family with sequence similarity 190, member B                          | -0.565 | 5.1E-03          |
| 228608_at   | <i>NALCN</i>     | sodium leak channel, non-selective                                     | -0.565 | 5.1E-03          |
| 221487_s_at | <i>ENSA</i>      | endosulfine alpha                                                      | -0.565 | 5.1E-03          |
| 223268_at   | <i>C11orf54</i>  | chromosome 11 open reading frame 54                                    | -0.565 | 5.0E-03          |
| 206448_at   | <i>ZNF365</i>    | zinc finger protein 365                                                | -0.566 | 5.0E-03          |
| 212321_at   | <i>SGPL1</i>     | sphingosine-1-phosphate lyase 1                                        | -0.566 | 5.0E-03          |
| 205156_s_at | <i>ASIC1</i>     | acid-sensing (proton-gated) ion channel 1                              | -0.566 | 5.0E-03          |
| 218675_at   | <i>SLC22A17</i>  | solute carrier family 22, member 17                                    | -0.566 | 5.0E-03          |
| 205412_at   | <i>ACAT1</i>     | acetyl-CoA acetyltransferase 1                                         | -0.566 | 5.0E-03          |

| Probeset ID  | Gene symbol     | Gene description                                                   | $\rho$ | Adjusted P-value |
|--------------|-----------------|--------------------------------------------------------------------|--------|------------------|
| 1554145_a_at | <i>PPP1R21</i>  | protein phosphatase 1, regulatory subunit 21                       | -0.567 | 4.9E-03          |
| 212837_at    | <i>FAM175B</i>  | family with sequence similarity 175, member B                      | -0.567 | 4.9E-03          |
| 217452_s_at  | <i>B3GALT2</i>  | UDP-Gal:betaGlcNAc beta 1,3-galactosyltransferase, polypeptide 2   | -0.567 | 4.9E-03          |
| 218128_at    | <i>NFYB</i>     | nuclear transcription factor Y, beta                               | -0.567 | 4.9E-03          |
| 228551_at    | <i>DENND5B</i>  | DENN/MADD domain containing 5B                                     | -0.567 | 4.9E-03          |
| 236154_at    | <i>QKI</i>      | QKI, KH domain containing, RNA binding                             | -0.567 | 4.9E-03          |
| 241364_at    | <i>TMEM57</i>   | transmembrane protein 57                                           | -0.568 | 4.8E-03          |
| 212504_at    | <i>DIP2C</i>    | DIP2 disco-interacting protein 2 homolog C (Drosophila)            | -0.568 | 4.8E-03          |
| 229809_at    | <i>POU6F1</i>   | POU class 6 homeobox 1                                             | -0.568 | 4.8E-03          |
| 224435_at    | <i>FAM213A</i>  | family with sequence similarity 213, member A                      | -0.568 | 4.8E-03          |
| 222984_at    | <i>PAIP2</i>    | poly(A) binding protein interacting protein 2                      | -0.568 | 4.8E-03          |
| 228494_at    | <i>PPP1R9A</i>  | protein phosphatase 1, regulatory subunit 9A                       | -0.569 | 4.8E-03          |
| 209028_s_at  | <i>ABII</i>     | abl-interactor 1                                                   | -0.569 | 4.8E-03          |
| 219451_at    | <i>MSRB2</i>    | methionine sulfoxide reductase B2                                  | -0.569 | 4.8E-03          |
| 227456_s_at  | <i>C6orf136</i> | chromosome 6 open reading frame 136                                | -0.569 | 4.8E-03          |
| 224933_s_at  | <i>JMJD1C</i>   | jumonji domain containing 1C                                       | -0.569 | 4.8E-03          |
| 228403_at    | <i>ENHO</i>     | energy homeostasis associated                                      | -0.569 | 4.7E-03          |
| 204199_at    | <i>RALGPS1</i>  | Ral GEF with PH domain and SH3 binding motif 1                     | -0.570 | 4.6E-03          |
| 205136_s_at  | <i>NUFIP1</i>   | nuclear fragile X mental retardation protein interacting protein 1 | -0.570 | 4.6E-03          |
| 204028_s_at  | <i>RABGAP1</i>  | RAB GTPase activating protein 1                                    | -0.570 | 4.6E-03          |
| 228709_at    | <i>TPR</i>      | translocated promoter region, nuclear basket protein               | -0.570 | 4.6E-03          |
| 231864_at    | <i>ZNF33A</i>   | zinc finger protein 33A                                            | -0.571 | 4.6E-03          |
| 203259_s_at  | <i>HDCC2</i>    | HD domain containing 2                                             | -0.571 | 4.6E-03          |
| 229430_at    | <i>C8orf46</i>  | chromosome 8 open reading frame 46                                 | -0.571 | 4.6E-03          |
| 233191_at    | <i>RUFY2</i>    | RUN and FYVE domain containing 2                                   | -0.571 | 4.6E-03          |
| 209447_at    | <i>SYNE1</i>    | spectrin repeat containing, nuclear envelope 1                     | -0.571 | 4.5E-03          |
| 209455_at    | <i>FBXW11</i>   | F-box and WD repeat domain containing 11                           | -0.571 | 4.5E-03          |
| 218947_s_at  | <i>MTPAP</i>    | mitochondrial poly(A) polymerase                                   | -0.571 | 4.5E-03          |
| 213564_x_at  | <i>LDHB</i>     | lactate dehydrogenase B                                            | -0.572 | 4.5E-03          |
| 222566_at    | <i>SUV420H1</i> | suppressor of variegation 4-20 homolog 1 (Drosophila)              | -0.572 | 4.5E-03          |
| 225325_at    | <i>MFSD6</i>    | major facilitator superfamily domain containing 6                  | -0.572 | 4.5E-03          |
| 214043_at    | <i>PTPRD</i>    | protein tyrosine phosphatase, receptor type, D                     | -0.572 | 4.5E-03          |
| 242196_at    | <i>ARHGAP32</i> | Rho GTPase activating protein 32                                   | -0.572 | 4.5E-03          |
| 37802_r_at   | <i>FAM63B</i>   | family with sequence similarity 63, member B                       | -0.572 | 4.5E-03          |
| 200061_s_at  | <i>RPS24</i>    | ribosomal protein S24                                              | -0.573 | 4.4E-03          |
| 222171_s_at  | <i>PKNOX2</i>   | PBX/knotted 1 homeobox 2                                           | -0.573 | 4.4E-03          |
| 234982_at    | <i>UBR3</i>     | ubiquitin protein ligase E3 component n-recogin 3 (putative)       | -0.573 | 4.4E-03          |
| 221763_at    | <i>JMJD1C</i>   | jumonji domain containing 1C                                       | -0.573 | 4.4E-03          |
| 207606_s_at  | <i>ARHGAP12</i> | Rho GTPase activating protein 12                                   | -0.573 | 4.4E-03          |
| 227934_at    | <i>KPNA5</i>    | karyopherin alpha 5 (importin alpha 6)                             | -0.574 | 4.4E-03          |
| 218773_s_at  | <i>MSRB2</i>    | methionine sulfoxide reductase B2                                  | -0.574 | 4.3E-03          |
| 232161_x_at  | <i>PTPN4</i>    | protein tyrosine phosphatase, non-receptor type 4 (megakaryocyte)  | -0.574 | 4.3E-03          |
| 212503_s_at  | <i>DIP2C</i>    | DIP2 disco-interacting protein 2 homolog C (Drosophila)            | -0.574 | 4.3E-03          |
| 213269_at    | <i>ZNF248</i>   | zinc finger protein 248                                            | -0.574 | 4.3E-03          |
| 238681_at    | <i>GDPD1</i>    | glycerophosphodiester phosphodiesterase domain                     | -0.574 | 4.3E-03          |

| Probeset ID | Gene symbol      | Gene description                                                                                                | $\rho$ | Adjusted P-value |
|-------------|------------------|-----------------------------------------------------------------------------------------------------------------|--------|------------------|
|             |                  | containing 1                                                                                                    |        |                  |
| 201677_at   | <i>C3orf37</i>   | Chromosome 3 open reading frame 37                                                                              | -0.575 | 4.3E-03          |
| 219336_s_at | <i>ASCC1</i>     | activating signal cointegrator 1 complex subunit 1                                                              | -0.575 | 4.3E-03          |
| 226001_at   | <i>KLHL5</i>     | kelch-like 5 (Drosophila)                                                                                       | -0.575 | 4.3E-03          |
| 219196_at   | <i>SCG3</i>      | secretogranin III                                                                                               | -0.575 | 4.3E-03          |
| 223179_at   | <i>YPEL3</i>     | yippee-like 3 (Drosophila)                                                                                      | -0.575 | 4.2E-03          |
| 229245_at   | <i>PLEKHA6</i>   | pleckstrin homology domain containing, family A member 6                                                        | -0.576 | 4.2E-03          |
| 212690_at   | <i>DDHD2</i>     | DDHD domain containing 2                                                                                        | -0.576 | 4.2E-03          |
| 244294_at   | <i>GTF2H5</i>    | general transcription factor IIIH, polypeptide 5                                                                | -0.576 | 4.2E-03          |
| 201007_at   | <i>HADHB</i>     | hydroxyacyl-CoA dehydrogenase/3-ketoacyl-CoA thiolase/enoyl-CoA hydratase (trifunctional protein), beta subunit | -0.576 | 4.2E-03          |
| 225115_at   | <i>HIPK2</i>     | homeodomain interacting protein kinase 2                                                                        | -0.576 | 4.2E-03          |
| 221771_s_at | <i>MPHOSPH8</i>  | M-phase phosphoprotein 8                                                                                        | -0.576 | 4.2E-03          |
| 220115_s_at | <i>CDH10</i>     | cadherin 10, type 2 (T2-cadherin)                                                                               | -0.577 | 4.1E-03          |
| 221679_s_at | <i>ABHD6</i>     | abhydrolase domain containing 6                                                                                 | -0.577 | 4.1E-03          |
| 209192_x_at | <i>KAT5</i>      | K(lysine) acetyltransferase 5                                                                                   | -0.577 | 4.1E-03          |
| 226030_at   | <i>ACADSB</i>    | acyl-CoA dehydrogenase, short/branched chain                                                                    | -0.577 | 4.1E-03          |
| 212326_at   | <i>VPS13D</i>    | vacuolar protein sorting 13 homolog D (S. cerevisiae)                                                           | -0.577 | 4.1E-03          |
| 219961_s_at | <i>PLK1S1</i>    | polo-like kinase 1 substrate 1                                                                                  | -0.577 | 4.1E-03          |
| 218174_s_at | <i>C10orf57</i>  | chromosome 10 open reading frame 57                                                                             | -0.577 | 4.1E-03          |
| 235556_at   | <i>CREBRF</i>    | CREB3 regulatory factor                                                                                         | -0.577 | 4.1E-03          |
| 225432_s_at | <i>CSRP2BP</i>   | CSRP2 binding protein                                                                                           | -0.578 | 4.1E-03          |
| 203457_at   | <i>STX7</i>      | syntaxin 7                                                                                                      | -0.578 | 4.1E-03          |
| 223727_at   | <i>KCNIP2</i>    | Kv channel interacting protein 2                                                                                | -0.578 | 4.1E-03          |
| 228480_at   | <i>VAPA</i>      | VAMP (vesicle-associated membrane protein)-associated protein A, 33kDa                                          | -0.578 | 4.1E-03          |
| 203562_at   | <i>FEZ1</i>      | fasciculation and elongation protein zeta 1 (zygin I)                                                           | -0.578 | 4.0E-03          |
| 235867_at   | <i>GSTM3</i>     | glutathione S-transferase mu 3 (brain)                                                                          | -0.578 | 4.0E-03          |
| 202741_at   | <i>PRKACB</i>    | protein kinase, cAMP-dependent, catalytic, beta                                                                 | -0.579 | 4.0E-03          |
| 209583_s_at | <i>CD200</i>     | CD200 molecule                                                                                                  | -0.579 | 4.0E-03          |
| 211941_s_at | <i>PEBP1</i>     | phosphatidylethanolamine binding protein 1                                                                      | -0.580 | 3.9E-03          |
| 218791_s_at | <i>C15orf29</i>  | chromosome 15 open reading frame 29                                                                             | -0.580 | 3.9E-03          |
| 220985_s_at | <i>RNF170</i>    | ring finger protein 170                                                                                         | -0.582 | 3.7E-03          |
| 212636_at   | <i>QKI</i>       | QKI, KH domain containing, RNA binding                                                                          | -0.582 | 3.7E-03          |
| 208940_at   | <i>SEPHS1</i>    | selenophosphate synthetase 1                                                                                    | -0.582 | 3.7E-03          |
| 228711_at   | <i>ZNF37A</i>    | zinc finger protein 37A                                                                                         | -0.582 | 3.7E-03          |
| 223192_at   | <i>SLC25A28</i>  | solute carrier family 25 (mitochondrial iron transporter), member 28                                            | -0.583 | 3.6E-03          |
| 210875_s_at | <i>ZEB1</i>      | zinc finger E-box binding homeobox 1                                                                            | -0.583 | 3.6E-03          |
| 223894_s_at | <i>AKTIP</i>     | AKT interacting protein                                                                                         | -0.584 | 3.6E-03          |
| 227455_at   | <i>C6orf136</i>  | chromosome 6 open reading frame 136                                                                             | -0.584 | 3.5E-03          |
| 213744_at   | <i>ATRNL1</i>    | attractin-like 1                                                                                                | -0.584 | 3.5E-03          |
| 203599_s_at | <i>WBP4</i>      | WW domain binding protein 4 (formin binding protein 21)                                                         | -0.584 | 3.5E-03          |
| 209046_s_at | <i>GABARAPL2</i> | GABA(A) receptor-associated protein-like 2                                                                      | -0.585 | 3.4E-03          |
| 212419_at   | <i>ZCCHC24</i>   | zinc finger, CCHC domain containing 24                                                                          | -0.585 | 3.4E-03          |
| 235079_at   | <i>ZNF704</i>    | zinc finger protein 704                                                                                         | -0.585 | 3.4E-03          |
| 202080_s_at | <i>TRAK1</i>     | trafficking protein, kinesin binding 1                                                                          | -0.585 | 3.4E-03          |



| Probeset ID  | Gene symbol         | Gene description                                                                                  | $\rho$ | Adjusted P-value |
|--------------|---------------------|---------------------------------------------------------------------------------------------------|--------|------------------|
| 208869_s_at  | <i>GABARAPL1</i>    | GABA(A) receptor-associated protein like 1                                                        | -0.585 | 3.4E-03          |
| 232059_at    | <i>DSCAML1</i>      | Down syndrome cell adhesion molecule like 1                                                       | -0.586 | 3.4E-03          |
| 209248_at    | <i>GHITM</i>        | growth hormone inducible transmembrane protein                                                    | -0.586 | 3.4E-03          |
| 210791_s_at  | <i>ARHGAP32</i>     | Rho GTPase activating protein 32                                                                  | -0.587 | 3.3E-03          |
| 226805_at    | <i>FITM2</i>        | fat storage-inducing transmembrane protein 2                                                      | -0.587 | 3.3E-03          |
| 201321_s_at  | <i>SMARCC2</i>      | SWI/SNF related, matrix associated, actin dependent regulator of chromatin, subfamily c, member 2 | -0.588 | 3.3E-03          |
| 235278_at    | <i>MACROD2</i>      | MACRO domain containing 2                                                                         | -0.588 | 3.3E-03          |
| 212747_at    | <i>ANKS1A</i>       | ankyrin repeat and sterile alpha motif domain containing 1A                                       | -0.588 | 3.2E-03          |
| 224649_x_at  | <i>CCNY</i>         | cyclin Y                                                                                          | -0.588 | 3.2E-03          |
| 219549_s_at  | <i>RTN3</i>         | reticulon 3                                                                                       | -0.588 | 3.2E-03          |
| 1553971_a_at | <i>GATS</i>         | GATS, stromal antigen 3 opposite strand                                                           | -0.588 | 3.2E-03          |
| 209983_s_at  | <i>NRXN2</i>        | neurexin 2                                                                                        | -0.588 | 3.2E-03          |
| 211423_s_at  | <i>SC5DL</i>        | sterol-C5-desaturase (ERG3 delta-5-desaturase homolog, <i>S. cerevisiae</i> )-like                | -0.588 | 3.2E-03          |
| 212905_at    | <i>CSTF2T</i>       | cleavage stimulation factor, 3' pre-RNA, subunit 2, 64kDa, tau variant                            | -0.589 | 3.2E-03          |
| 37953_s_at   | <i>ASIC1</i>        | acid-sensing (proton-gated) ion channel 1                                                         | -0.589 | 3.1E-03          |
| 227451_s_at  | <i>CCDC90A</i>      | coiled-coil domain containing 90A                                                                 | -0.589 | 3.1E-03          |
| 203611_at    | <i>TERF2</i>        | telomeric repeat binding factor 2                                                                 | -0.590 | 3.1E-03          |
| 218127_at    | <i>NFYB</i>         | nuclear transcription factor Y, beta                                                              | -0.590 | 3.1E-03          |
| 224581_s_at  | <i>NUCKS1</i>       | nuclear casein kinase and cyclin-dependent kinase substrate 1                                     | -0.590 | 3.1E-03          |
| 214258_x_at  | <i>KAT5</i>         | K(lysine) acetyltransferase 5                                                                     | -0.590 | 3.1E-03          |
| 221527_s_at  | <i>PARD3</i>        | par-3 partitioning defective 3 homolog ( <i>C. elegans</i> )                                      | -0.591 | 3.1E-03          |
| 238739_at    | <i>IPMK</i>         | inositol polyphosphate multikinase                                                                | -0.591 | 3.1E-03          |
| 1554609_at   | <i>LOC100287896</i> | uncharacterized LOC100287896                                                                      | -0.591 | 3.1E-03          |
| 223886_s_at  | <i>RNF146</i>       | ring finger protein 146                                                                           | -0.591 | 3.1E-03          |
| 219767_s_at  | <i>CRYZL1</i>       | crystallin, zeta (quinone reductase)-like 1                                                       | -0.591 | 3.1E-03          |
| 240214_at    | <i>RWDD1</i>        | RWD domain containing 1                                                                           | -0.591 | 3.0E-03          |
| 203427_at    | <i>ASF1A</i>        | ASF1 anti-silencing function 1 homolog A ( <i>S. cerevisiae</i> )                                 | -0.591 | 3.0E-03          |
| 201778_s_at  | <i>KIAA0494</i>     | KIAA0494                                                                                          | -0.592 | 3.0E-03          |
| 212289_at    | <i>ANKRD12</i>      | ankyrin repeat domain 12                                                                          | -0.592 | 3.0E-03          |
| 210740_s_at  | <i>ITPK1</i>        | inositol-tetrakisphosphate 1-kinase                                                               | -0.592 | 3.0E-03          |
| 209618_at    | <i>CTNND2</i>       | catenin (cadherin-associated protein), delta 2 (neural plakophilin-related arm-repeat protein)    | -0.592 | 3.0E-03          |
| 218789_s_at  | <i>C11orf71</i>     | chromosome 11 open reading frame 71                                                               | -0.592 | 3.0E-03          |
| 233873_x_at  | <i>MTPAP</i>        | mitochondrial poly(A) polymerase                                                                  | -0.592 | 3.0E-03          |
| 228185_at    | <i>ZNF25</i>        | zinc finger protein 25                                                                            | -0.592 | 3.0E-03          |
| 218878_s_at  | <i>SIRT1</i>        | sirtuin 1                                                                                         | -0.592 | 3.0E-03          |
| 228697_at    | <i>HINT3</i>        | histidine triad nucleotide binding protein 3                                                      | -0.593 | 3.0E-03          |
| 228354_at    | <i>MORN4</i>        | MORN repeat containing 4                                                                          | -0.593 | 3.0E-03          |
| 236178_at    | <i>C6orf162</i>     | chromosome 6 open reading frame 162                                                               | -0.593 | 3.0E-03          |
| 203870_at    | <i>USP46</i>        | ubiquitin specific peptidase 46                                                                   | -0.593 | 3.0E-03          |
| 204732_s_at  | <i>TRIM23</i>       | tripartite motif containing 23                                                                    | -0.594 | 3.0E-03          |
| 227407_at    | <i>TAPT1</i>        | transmembrane anterior posterior transformation 1                                                 | -0.594 | 3.0E-03          |
| 222562_s_at  | <i>TNKS2</i>        | tankyrase, TRF1-interacting ankyrin-related ADP-ribose polymerase 2                               | -0.594 | 2.9E-03          |
| 203632_s_at  | <i>GPRC5B</i>       | G protein-coupled receptor, family C, group 5, member B                                           | -0.594 | 2.9E-03          |

| Probeset ID | Gene symbol         | Gene description                                                                              | $\rho$ | Adjusted P-value |
|-------------|---------------------|-----------------------------------------------------------------------------------------------|--------|------------------|
| 211515_s_at | <i>DSTYK</i>        | dual serine/threonine and tyrosine protein kinase                                             | -0.594 | 2.9E-03          |
| 204813_at   | <i>MAPK10</i>       | mitogen-activated protein kinase 10                                                           | -0.595 | 2.9E-03          |
| 240433_x_at | <i>CADM2</i>        | cell adhesion molecule 2                                                                      | -0.595 | 2.9E-03          |
| 207971_s_at | <i>CEP68</i>        | centrosomal protein 68kDa                                                                     | -0.595 | 2.9E-03          |
| 220999_s_at | <i>CYFIP2</i>       | cytoplasmic FMR1 interacting protein 2                                                        | -0.595 | 2.9E-03          |
| 208030_s_at | <i>ADD1</i>         | adducin 1 (alpha)                                                                             | -0.596 | 2.9E-03          |
| 212989_at   | <i>SGMS1</i>        | sphingomyelin synthase 1                                                                      | -0.596 | 2.9E-03          |
| 225509_at   | <i>SAP30L</i>       | SAP30-like                                                                                    | -0.596 | 2.9E-03          |
| 213838_at   | <i>NOL7</i>         | nucleolar protein 7, 27kDa                                                                    | -0.596 | 2.8E-03          |
| 234947_s_at | <i>FAM204A</i>      | family with sequence similarity 204, member A                                                 | -0.596 | 2.8E-03          |
| 226537_at   | <i>HINT3</i>        | histidine triad nucleotide binding protein 3                                                  | -0.596 | 2.8E-03          |
| 204063_s_at | <i>ULK2</i>         | unc-51-like kinase 2 (C. elegans)                                                             | -0.596 | 2.8E-03          |
| 235061_at   | <i>PPMIK</i>        | protein phosphatase, Mg <sup>2+</sup> /Mn <sup>2+</sup> dependent, 1K                         | -0.596 | 2.8E-03          |
| 216218_s_at | <i>PLCL2</i>        | phospholipase C-like 2                                                                        | -0.597 | 2.8E-03          |
| 222431_at   | <i>SPIN1</i>        | spindlin 1                                                                                    | -0.597 | 2.8E-03          |
| 203449_s_at | <i>TERF1</i>        | telomeric repeat binding factor (NIMA-interacting) 1                                          | -0.597 | 2.8E-03          |
| 223315_at   | <i>NTN4</i>         | netrin 4                                                                                      | -0.597 | 2.8E-03          |
| 228259_s_at | <i>EPB41L4A-AS1</i> | EPB41L4A antisense RNA 1 (non-protein coding)                                                 | -0.597 | 2.8E-03          |
| 208055_s_at | <i>HERC4</i>        | HECT and RLD domain containing E3 ubiquitin protein ligase 4                                  | -0.598 | 2.8E-03          |
| 209197_at   | <i>SYT11</i>        | synaptotagmin XI                                                                              | -0.598 | 2.8E-03          |
| 221221_s_at | <i>KLHL3</i>        | kelch-like 3 (Drosophila)                                                                     | -0.598 | 2.8E-03          |
| 213745_at   | <i>ATRNL1</i>       | attractin-like 1                                                                              | -0.598 | 2.8E-03          |
| 219046_s_at | <i>PKNOX2</i>       | PBX/knotted 1 homeobox 2                                                                      | -0.598 | 2.8E-03          |
| 221590_s_at | <i>ALDH6A1</i>      | aldehyde dehydrogenase 6 family, member A1                                                    | -0.598 | 2.8E-03          |
| 201030_x_at | <i>LDHB</i>         | lactate dehydrogenase B                                                                       | -0.598 | 2.8E-03          |
| 237802_at   | <i>XKR4</i>         | XK, Kell blood group complex subunit-related family, member 4                                 | -0.599 | 2.8E-03          |
| 201753_s_at | <i>ADD3</i>         | adducin 3 (gamma)                                                                             | -0.599 | 2.7E-03          |
| 203156_at   | <i>AKAP11</i>       | A kinase (PRKA) anchor protein 11                                                             | -0.599 | 2.7E-03          |
| 201957_at   | <i>PPP1R12B</i>     | protein phosphatase 1, regulatory subunit 12B                                                 | -0.599 | 2.7E-03          |
| 209818_s_at | <i>HABP4</i>        | hyaluronan binding protein 4                                                                  | -0.599 | 2.7E-03          |
| 219945_at   | <i>DDX25</i>        | DEAD (Asp-Glu-Ala-Asp) box helicase 25                                                        | -0.599 | 2.7E-03          |
| 226607_at   | <i>C20orf194</i>    | chromosome 20 open reading frame 194                                                          | -0.599 | 2.7E-03          |
| 213034_at   | <i>SIK3</i>         | SIK family kinase 3                                                                           | -0.600 | 2.7E-03          |
| 223406_x_at | <i>FAM192A</i>      | family with sequence similarity 192, member A                                                 | -0.600 | 2.7E-03          |
| 209469_at   | <i>GPM6A</i>        | glycoprotein M6A                                                                              | -0.600 | 2.7E-03          |
| 223132_s_at | <i>TRIM8</i>        | tripartite motif containing 8                                                                 | -0.600 | 2.7E-03          |
| 223672_at   | <i>SGIP1</i>        | SH3-domain GRB2-like (endophilin) interacting protein 1                                       | -0.601 | 2.7E-03          |
| 212190_at   | <i>SERPINE2</i>     | serpin peptidase inhibitor, clade E (nexin, plasminogen activator inhibitor type 1), member 2 | -0.601 | 2.6E-03          |
| 214053_at   | <i>ERBB4</i>        | v-erb-a erythroblastic leukemia viral oncogene homolog 4 (avian)                              | -0.601 | 2.6E-03          |
| 226203_at   | <i>MYO9A</i>        | myosin IXA                                                                                    | -0.602 | 2.6E-03          |
| 226741_at   | <i>SLC12A6</i>      | solute carrier family 12 (potassium/chloride transporters), member 6                          | -0.602 | 2.6E-03          |
| 203869_at   | <i>USP46</i>        | ubiquitin specific peptidase 46                                                               | -0.602 | 2.6E-03          |
| 218264_at   | <i>BCCIP</i>        | BRCA2 and CDKN1A interacting protein                                                          | -0.603 | 2.6E-03          |
| 229317_at   | <i>KPNA5</i>        | karyopherin alpha 5 (importin alpha 6)                                                        | -0.603 | 2.5E-03          |

| Probeset ID  | Gene symbol      | Gene description                                                           | $\rho$ | Adjusted P-value |
|--------------|------------------|----------------------------------------------------------------------------|--------|------------------|
| 212764_at    | <i>ZEB1</i>      | zinc finger E-box binding homeobox 1                                       | -0.603 | 2.5E-03          |
| 223283_s_at  | <i>TSHZ1</i>     | teashirt zinc finger homeobox 1                                            | -0.603 | 2.5E-03          |
| 223336_s_at  | <i>RAB18</i>     | RAB18, member RAS oncogene family                                          | -0.603 | 2.5E-03          |
| 225511_at    | <i>GPRC5B</i>    | G protein-coupled receptor, family C, group 5, member B                    | -0.604 | 2.5E-03          |
| 204447_at    | <i>PROSAPIP1</i> | ProSAPiP1 protein                                                          | -0.604 | 2.5E-03          |
| 202137_s_at  | <i>ZMYND11</i>   | zinc finger, MYND-type containing 11                                       | -0.604 | 2.5E-03          |
| 218032_at    | <i>SNN</i>       | stannin                                                                    | -0.604 | 2.5E-03          |
| 225825_at    | <i>C20orf194</i> | chromosome 20 open reading frame 194                                       | -0.604 | 2.5E-03          |
| 235118_at    | <i>CADM2</i>     | cell adhesion molecule 2                                                   | -0.604 | 2.5E-03          |
| 203950_s_at  | <i>CLCN6</i>     | chloride channel, voltage-sensitive 6                                      | -0.604 | 2.5E-03          |
| 209155_s_at  | <i>NT5C2</i>     | 5'-nucleotidase, cytosolic II                                              | -0.605 | 2.5E-03          |
| 221213_s_at  | <i>ZNF280D</i>   | zinc finger protein 280D                                                   | -0.605 | 2.5E-03          |
| 235561_at    | <i>TXNL1</i>     | thioredoxin-like 1                                                         | -0.605 | 2.5E-03          |
| 212606_at    | <i>WDFY3</i>     | WD repeat and FYVE domain containing 3                                     | -0.605 | 2.5E-03          |
| 218909_at    | <i>RPS6KC1</i>   | ribosomal protein S6 kinase, 52kDa, polypeptide 1                          | -0.605 | 2.5E-03          |
| 205773_at    | <i>CPEB3</i>     | cytoplasmic polyadenylation element binding protein 3                      | -0.607 | 2.4E-03          |
| 223340_at    | <i>ATL1</i>      | atlastin GTPase 1                                                          | -0.607 | 2.4E-03          |
| 225354_s_at  | <i>SH3BGRL2</i>  | SH3 domain binding glutamic acid-rich protein like 2                       | -0.608 | 2.3E-03          |
| 208990_s_at  | <i>HNRNPH3</i>   | heterogeneous nuclear ribonucleoprotein H3 (2H9)                           | -0.608 | 2.3E-03          |
| 226684_at    | <i>ATG2B</i>     | autophagy related 2B                                                       | -0.608 | 2.3E-03          |
| 235866_at    | <i>C9orf85</i>   | chromosome 9 open reading frame 85                                         | -0.608 | 2.3E-03          |
| 228999_at    | <i>CHD2</i>      | chromodomain helicase DNA binding protein 2                                | -0.608 | 2.3E-03          |
| 221523_s_at  | <i>RRAGD</i>     | Ras-related GTP binding D                                                  | -0.609 | 2.3E-03          |
| 224850_at    | <i>ATAD1</i>     | ATPase family, AAA domain containing 1                                     | -0.609 | 2.3E-03          |
| 225368_at    | <i>HIPK2</i>     | homeodomain interacting protein kinase 2                                   | -0.609 | 2.3E-03          |
| 227169_at    | <i>DNAJC18</i>   | DnaJ (Hsp40) homolog, subfamily C, member 18                               | -0.609 | 2.3E-03          |
| 203261_at    | <i>DCTN6</i>     | dynactin 6                                                                 | -0.610 | 2.3E-03          |
| 224977_at    | <i>C6orf89</i>   | chromosome 6 open reading frame 89                                         | -0.610 | 2.3E-03          |
| 1552733_at   | <i>KLHDC1</i>    | kelch domain containing 1                                                  | -0.610 | 2.3E-03          |
| 224787_s_at  | <i>RAB18</i>     | RAB18, member RAS oncogene family                                          | -0.611 | 2.2E-03          |
| 224648_at    | <i>GPBP1</i>     | GC-rich promoter binding protein 1                                         | -0.611 | 2.2E-03          |
| 227572_at    | <i>USP30</i>     | ubiquitin specific peptidase 30                                            | -0.611 | 2.2E-03          |
| 225913_at    | <i>PEAK1</i>     | NKF3 kinase family member                                                  | -0.612 | 2.2E-03          |
| 225845_at    | <i>ZBTB44</i>    | zinc finger and BTB domain containing 44                                   | -0.612 | 2.2E-03          |
| 221552_at    | <i>ABHD6</i>     | abhydrolase domain containing 6                                            | -0.612 | 2.2E-03          |
| 209504_s_at  | <i>PLEKHB1</i>   | pleckstrin homology domain containing, family B (evectins) member 1        | -0.613 | 2.2E-03          |
| 201344_at    | <i>UBE2D2</i>    | ubiquitin-conjugating enzyme E2D 2                                         | -0.613 | 2.2E-03          |
| 224377_s_at  | <i>RAB18</i>     | RAB18, member RAS oncogene family                                          | -0.614 | 2.1E-03          |
| 218306_s_at  | <i>HERC1</i>     | HECT and RLD domain containing E3 ubiquitin protein ligase family member 1 | -0.614 | 2.1E-03          |
| 205202_at    | <i>PCMT1</i>     | protein-L-isoaspartate (D-aspartate) O-methyltransferase                   | -0.614 | 2.1E-03          |
| 202022_at    | <i>ALDOC</i>     | aldolase C, fructose-bisphosphate                                          | -0.614 | 2.1E-03          |
| 202405_at    | <i>TIAL1</i>     | TIA1 cytotoxic granule-associated RNA binding protein-like 1               | -0.614 | 2.1E-03          |
| 216903_s_at  | <i>MICU1</i>     | mitochondrial calcium uptake 1                                             | -0.614 | 2.1E-03          |
| 1558759_s_at | <i>CLASP2</i>    | cytoplasmic linker associated protein 2                                    | -0.614 | 2.1E-03          |
| 209027_s_at  | <i>ABII</i>      | abl-interactor 1                                                           | -0.615 | 2.1E-03          |
| 235780_at    | <i>PRKACB</i>    | protein kinase, cAMP-dependent, catalytic, beta                            | -0.615 | 2.1E-03          |

| Probeset ID  | Gene symbol     | Gene description                                                           | $\rho$ | Adjusted P-value |
|--------------|-----------------|----------------------------------------------------------------------------|--------|------------------|
| 213222_at    | <i>PLCB1</i>    | phospholipase C, beta 1 (phosphoinositide-specific)                        | -0.616 | 2.1E-03          |
| 227154_at    | <i>IGSF21</i>   | immunoglobulin superfamily, member 21                                      | -0.616 | 2.0E-03          |
| 203845_at    | <i>KAT2B</i>    | K(lysine) acetyltransferase 2B                                             | -0.617 | 2.0E-03          |
| 227351_at    | <i>C16orf52</i> | chromosome 16 open reading frame 52                                        | -0.617 | 2.0E-03          |
| 225768_at    | <i>NR1D2</i>    | nuclear receptor subfamily 1, group D, member 2                            | -0.618 | 2.0E-03          |
| 208881_x_at  | <i>IDII</i>     | isopentenyl-diphosphate delta isomerase 1                                  | -0.618 | 2.0E-03          |
| 213208_at    | <i>KIAA0240</i> | KIAA0240                                                                   | -0.618 | 2.0E-03          |
| 226148_at    | <i>ZBTB44</i>   | zinc finger and BTB domain containing 44                                   | -0.618 | 2.0E-03          |
| 213489_at    | <i>MAPRE2</i>   | microtubule-associated protein, RP/EB family, member 2                     | -0.619 | 2.0E-03          |
| 224780_at    | <i>RBM17</i>    | RNA binding motif protein 17                                               | -0.620 | 1.9E-03          |
| 209271_at    | <i>BPTF</i>     | bromodomain PHD finger transcription factor                                | -0.620 | 1.9E-03          |
| 227049_at    | <i>ZADH2</i>    | zinc binding alcohol dehydrogenase domain containing 2                     | -0.620 | 1.9E-03          |
| 227949_at    | <i>PHACTR3</i>  | phosphatase and actin regulator 3                                          | -0.620 | 1.9E-03          |
| 221702_s_at  | <i>TM2D3</i>    | TM2 domain containing 3                                                    | -0.621 | 1.9E-03          |
| 225116_at    | <i>HIPK2</i>    | homeodomain interacting protein kinase 2                                   | -0.621 | 1.9E-03          |
| 205669_at    | <i>NCAM2</i>    | neural cell adhesion molecule 2                                            | -0.621 | 1.9E-03          |
| 209538_at    | <i>ZNF32</i>    | zinc finger protein 32                                                     | -0.621 | 1.9E-03          |
| 227209_at    | <i>CNTN1</i>    | contactin 1                                                                | -0.621 | 1.9E-03          |
| 204290_s_at  | <i>ALDH6A1</i>  | aldehyde dehydrogenase 6 family, member A1                                 | -0.621 | 1.9E-03          |
| 213364_s_at  | <i>SNX1</i>     | sorting nexin 1                                                            | -0.623 | 1.8E-03          |
| 226964_at    | <i>TTBK2</i>    | tau tubulin kinase 2                                                       | -0.623 | 1.8E-03          |
| 205638_at    | <i>BAI3</i>     | brain-specific angiogenesis inhibitor 3                                    | -0.624 | 1.8E-03          |
| 208857_s_at  | <i>PCMT1</i>    | protein-L-isoaspartate (D-aspartate) O-methyltransferase                   | -0.624 | 1.8E-03          |
| 235798_at    | <i>TMEM170B</i> | transmembrane protein 170B                                                 | -0.624 | 1.8E-03          |
| 1553321_a_at | <i>SULT1C4</i>  | sulfotransferase family, cytosolic, 1C, member 4                           | -0.624 | 1.8E-03          |
| 205839_s_at  | <i>BZRAP1</i>   | benzodiazapine receptor (peripheral) associated protein 1                  | -0.625 | 1.8E-03          |
| 200970_s_at  | <i>SERP1</i>    | stress-associated endoplasmic reticulum protein 1                          | -0.625 | 1.8E-03          |
| 1554547_at   | <i>FAM13C</i>   | family with sequence similarity 13, member C                               | -0.626 | 1.7E-03          |
| 217286_s_at  | <i>NDRG3</i>    | NDRG family member 3                                                       | -0.626 | 1.7E-03          |
| 227728_at    | <i>PPM1A</i>    | protein phosphatase, Mg <sup>2+</sup> /Mn <sup>2+</sup> dependent, 1A      | -0.626 | 1.7E-03          |
| 241365_at    | <i>SATB1</i>    | SATB homeobox 1                                                            | -0.626 | 1.7E-03          |
| 212867_at    | <i>NCOA2</i>    | nuclear receptor coactivator 2                                             | -0.626 | 1.7E-03          |
| 209065_at    | <i>UQCRCB</i>   | ubiquinol-cytochrome c reductase binding protein                           | -0.627 | 1.7E-03          |
| 212080_at    | <i>MLL</i>      | myeloid/lymphoid or mixed-lineage leukemia (trithorax homolog, Drosophila) | -0.627 | 1.7E-03          |
| 203831_at    | <i>R3HDM2</i>   | R3H domain containing 2                                                    | -0.627 | 1.7E-03          |
| 1555250_a_at | <i>CPEB3</i>    | cytoplasmic polyadenylation element binding protein 3                      | -0.628 | 1.7E-03          |
| 1554132_a_at | <i>FAM190B</i>  | family with sequence similarity 190, member B                              | -0.628 | 1.7E-03          |
| 226358_at    | <i>APH1B</i>    | anterior pharynx defective 1 homolog B (C. elegans)                        | -0.629 | 1.6E-03          |
| 212675_s_at  | <i>CEP68</i>    | centrosomal protein 68kDa                                                  | -0.630 | 1.6E-03          |
| 226680_at    | <i>IKZF5</i>    | IKAROS family zinc finger 5 (Pegasus)                                      | -0.630 | 1.6E-03          |
| 228390_at    | <i>RAB30</i>    | RAB30, member RAS oncogene family                                          | -0.630 | 1.6E-03          |
| 226977_at    | <i>IGIP</i>     | IgA-inducing protein homolog (Bos taurus)                                  | -0.630 | 1.6E-03          |
| 201034_at    | <i>ADD3</i>     | adducin 3 (gamma)                                                          | -0.630 | 1.6E-03          |
| 204615_x_at  | <i>IDII</i>     | isopentenyl-diphosphate delta isomerase 1                                  | -0.630 | 1.6E-03          |
| 224248_x_at  | <i>FAM192A</i>  | family with sequence similarity 192, member A                              | -0.630 | 1.6E-03          |
| 213433_at    | <i>ARL3</i>     | ADP-ribosylation factor-like 3                                             | -0.631 | 1.6E-03          |
| 213555_at    | <i>RWDD2A</i>   | RWD domain containing 2A                                                   | -0.631 | 1.6E-03          |
| 224645_at    | <i>EIF4EBP2</i> | eukaryotic translation initiation factor 4E binding protein                | -0.631 | 1.6E-03          |

| Probeset ID | Gene symbol     | Gene description                                                | $\rho$ | Adjusted P-value |
|-------------|-----------------|-----------------------------------------------------------------|--------|------------------|
|             |                 | 2                                                               |        |                  |
| 205280_at   | <i>GLRB</i>     | glycine receptor, beta                                          | -0.632 | 1.6E-03          |
| 213093_at   | <i>PRKCA</i>    | protein kinase C, alpha                                         | -0.632 | 1.6E-03          |
| 225313_at   | <i>FAM217B</i>  | family with sequence similarity 217, member B                   | -0.632 | 1.6E-03          |
| 213411_at   | <i>ADAM22</i>   | ADAM metallopeptidase domain 22                                 | -0.632 | 1.6E-03          |
| 210976_s_at | <i>PFKM</i>     | phosphofructokinase, muscle                                     | -0.632 | 1.6E-03          |
| 201425_at   | <i>ALDH2</i>    | aldehyde dehydrogenase 2 family (mitochondrial)                 | -0.632 | 1.6E-03          |
| 1554161_at  | <i>SLC25A27</i> | solute carrier family 25, member 27                             | -0.632 | 1.6E-03          |
| 206453_s_at | <i>NDRG2</i>    | NDRG family member 2                                            | -0.632 | 1.6E-03          |
| 235072_s_at | <i>KIF13A</i>   | kinesin family member 13A                                       | -0.633 | 1.6E-03          |
| 211994_at   | <i>WNK1</i>     | WNK lysine deficient protein kinase 1                           | -0.634 | 1.6E-03          |
| 212423_at   | <i>ZCCHC24</i>  | zinc finger, CCHC domain containing 24                          | -0.634 | 1.6E-03          |
| 202432_at   | <i>PPP3CB</i>   | protein phosphatase 3, catalytic subunit, beta isozyme          | -0.634 | 1.6E-03          |
| 225097_at   | <i>HIPK2</i>    | homeodomain interacting protein kinase 2                        | -0.634 | 1.6E-03          |
| 229463_at   | <i>NTRK2</i>    | neurotrophic tyrosine kinase, receptor, type 2                  | -0.634 | 1.6E-03          |
| 225751_at   | <i>RBM17</i>    | RNA binding motif protein 17                                    | -0.635 | 1.5E-03          |
| 228967_at   | <i>EIF1</i>     | eukaryotic translation initiation factor 1                      | -0.635 | 1.5E-03          |
| 200899_s_at | <i>MGEA5</i>    | meningioma expressed antigen 5 (hyaluronidase)                  | -0.636 | 1.5E-03          |
| 214279_s_at | <i>NDRG2</i>    | NDRG family member 2                                            | -0.637 | 1.4E-03          |
| 203619_s_at | <i>FAIM2</i>    | Fas apoptotic inhibitory molecule 2                             | -0.637 | 1.4E-03          |
| 210414_at   | <i>FLRT1</i>    | fibronectin leucine rich transmembrane protein 1                | -0.638 | 1.4E-03          |
| 226774_at   | <i>FAM120B</i>  | family with sequence similarity 120B                            | -0.638 | 1.4E-03          |
| 205359_at   | <i>AKAP6</i>    | A kinase (PRKA) anchor protein 6                                | -0.638 | 1.4E-03          |
| 212508_at   | <i>MOAP1</i>    | modulator of apoptosis 1                                        | -0.639 | 1.4E-03          |
| 221623_at   | <i>BCAN</i>     | brevican                                                        | -0.640 | 1.4E-03          |
| 227611_at   | <i>TARSL2</i>   | threonyl-tRNA synthetase-like 2                                 | -0.640 | 1.4E-03          |
| 238454_at   | <i>ZNF540</i>   | zinc finger protein 540                                         | -0.640 | 1.4E-03          |
| 228857_at   | <i>GNL1</i>     | guanine nucleotide binding protein-like 1                       | -0.640 | 1.4E-03          |
| 212453_at   | <i>KIAA1279</i> | KIAA1279                                                        | -0.642 | 1.3E-03          |
| 221556_at   | <i>CDC14B</i>   | CDC14 cell division cycle 14 homolog B ( <i>S. cerevisiae</i> ) | -0.642 | 1.3E-03          |
| 225351_at   | <i>FAM45A</i>   | family with sequence similarity 45, member A                    | -0.642 | 1.3E-03          |
| 227202_at   | <i>CNTN1</i>    | contactin 1                                                     | -0.643 | 1.3E-03          |
| 236095_at   | <i>NTRK2</i>    | neurotrophic tyrosine kinase, receptor, type 2                  | -0.643 | 1.3E-03          |
| 231031_at   | <i>KGFLP2</i>   | keratinocyte growth factor-like protein 2                       | -0.643 | 1.3E-03          |
| 215522_at   | <i>SORCS3</i>   | sortilin-related VPS10 domain containing receptor 3             | -0.643 | 1.3E-03          |
| 229072_at   | <i>RAB30</i>    | RAB30, member RAS oncogene family                               | -0.644 | 1.3E-03          |
| 213271_s_at | <i>DOPEY1</i>   | dopey family member 1                                           | -0.645 | 1.3E-03          |
| 238497_at   | <i>TMEM136</i>  | transmembrane protein 136                                       | -0.645 | 1.3E-03          |
| 231112_at   | <i>SNRPE</i>    | small nuclear ribonucleoprotein polypeptide E                   | -0.645 | 1.3E-03          |
| 241874_at   | <i>IGIP</i>     | IgA-inducing protein homolog ( <i>Bos taurus</i> )              | -0.646 | 1.2E-03          |
| 212323_s_at | <i>VPS13D</i>   | vacuolar protein sorting 13 homolog D ( <i>S. cerevisiae</i> )  | -0.647 | 1.2E-03          |
| 223282_at   | <i>TSHZ1</i>    | teashirt zinc finger homeobox 1                                 | -0.647 | 1.2E-03          |
| 221476_s_at | <i>RPL15</i>    | ribosomal protein L15                                           | -0.647 | 1.2E-03          |
| 224647_at   | <i>CCNY</i>     | cyclin Y                                                        | -0.647 | 1.2E-03          |
| 224368_s_at | <i>NDRG3</i>    | NDRG family member 3                                            | -0.648 | 1.2E-03          |
| 240228_at   | <i>CSMD3</i>    | CUB and Sushi multiple domains 3                                | -0.648 | 1.2E-03          |
| 203620_s_at | <i>FCHSD2</i>   | FCH and double SH3 domains 2                                    | -0.648 | 1.2E-03          |
| 212062_at   | <i>ATP9A</i>    | ATPase, class II, type 9A                                       | -0.649 | 1.2E-03          |

| Probeset ID | Gene symbol     | Gene description                                                                            | $\rho$ | Adjusted P-value |
|-------------|-----------------|---------------------------------------------------------------------------------------------|--------|------------------|
| 223721_s_at | <i>DNAJC12</i>  | DnaJ (Hsp40) homolog, subfamily C, member 12                                                | -0.650 | 1.2E-03          |
| 218373_at   | <i>AKTIP</i>    | AKT interacting protein                                                                     | -0.651 | 1.2E-03          |
| 215058_at   | <i>DENND5B</i>  | DENN/MADD domain containing 5B                                                              | -0.651 | 1.2E-03          |
| 203408_s_at | <i>SATB1</i>    | SATB homeobox 1                                                                             | -0.653 | 1.1E-03          |
| 215848_at   | <i>SCAPER</i>   | S-phase cyclin A-associated protein in the ER                                               | -0.653 | 1.1E-03          |
| 214762_at   | <i>ATP6V1G2</i> | ATPase, H <sup>+</sup> transporting, lysosomal 13kDa, V1 subunit G2                         | -0.653 | 1.1E-03          |
| 239068_at   | <i>GNL1</i>     | guanine nucleotide binding protein-like 1                                                   | -0.654 | 1.1E-03          |
| 226627_at   | <i>SEPT8</i>    | septin 8                                                                                    | -0.654 | 1.1E-03          |
| 213549_at   | <i>PDZD8</i>    | PDZ domain containing 8                                                                     | -0.656 | 1.1E-03          |
| 221486_at   | <i>ENSA</i>     | endosulfine alpha                                                                           | -0.656 | 1.1E-03          |
| 224651_at   | <i>CCNY</i>     | cyclin Y                                                                                    | -0.656 | 1.1E-03          |
| 202364_at   | <i>MXI1</i>     | MAX interactor 1                                                                            | -0.657 | 1.1E-03          |
| 212462_at   | <i>KAT6B</i>    | K(lysine) acetyltransferase 6B                                                              | -0.658 | 1.0E-03          |
| 221045_s_at | <i>PER3</i>     | period homolog 3 (Drosophila)                                                               | -0.658 | 1.0E-03          |
| 211874_s_at | <i>KAT6B</i>    | K(lysine) acetyltransferase 6B                                                              | -0.658 | 1.0E-03          |
| 45288_at    | <i>ABHD6</i>    | abhydrolase domain containing 6                                                             | -0.659 | 1.0E-03          |
| 225131_at   | <i>ZRANB1</i>   | zinc finger, RAN-binding domain containing 1                                                | -0.659 | 1.0E-03          |
| 225950_at   | <i>SAMD8</i>    | sterile alpha motif domain containing 8                                                     | -0.660 | 1.0E-03          |
| 202959_at   | <i>MUT</i>      | methylmalonyl CoA mutase                                                                    | -0.661 | 9.7E-04          |
| 224755_at   | <i>TM9SF3</i>   | transmembrane 9 superfamily member 3                                                        | -0.662 | 9.4E-04          |
| 218218_at   | <i>APPL2</i>    | adaptor protein, phosphotyrosine interaction, PH domain and leucine zipper containing 2     | -0.662 | 9.4E-04          |
| 212308_at   | <i>CLASP2</i>   | cytoplasmic linker associated protein 2                                                     | -0.663 | 9.3E-04          |
| 214821_at   | <i>SLC25A4</i>  | solute carrier family 25 (mitochondrial carrier; adenine nucleotide translocator), member 4 | -0.664 | 8.9E-04          |
| 239425_at   | <i>DCUNID5</i>  | DCN1, defective in cullin neddylation 1, domain containing 5 ( <i>S. cerevisiae</i> )       | -0.665 | 8.9E-04          |
| 228640_at   | <i>PCDH7</i>    | protocadherin 7                                                                             | -0.665 | 8.8E-04          |
| 212199_at   | <i>MRFAP1L1</i> | Morf4 family associated protein 1-like 1                                                    | -0.667 | 8.7E-04          |
| 226527_at   | <i>RPRD2</i>    | regulation of nuclear pre-mRNA domain containing 2                                          | -0.667 | 8.7E-04          |
| 224471_s_at | <i>BTRC</i>     | beta-transducin repeat containing E3 ubiquitin protein ligase                               | -0.668 | 8.7E-04          |
| 200711_s_at | <i>SKP1</i>     | S-phase kinase-associated protein 1                                                         | -0.668 | 8.7E-04          |
| 235360_at   | <i>PLEKHM3</i>  | pleckstrin homology domain containing, family M, member 3                                   | -0.668 | 8.7E-04          |
| 226981_at   | <i>MLL</i>      | myeloid/lymphoid or mixed-lineage leukemia (trithorax homolog, <i>Drosophila</i> )          | -0.669 | 8.7E-04          |
| 227341_at   | <i>BEND7</i>    | BEN domain containing 7                                                                     | -0.670 | 8.7E-04          |
| 202136_at   | <i>ZMYND11</i>  | zinc finger, MYND-type containing 11                                                        | -0.670 | 8.7E-04          |
| 225138_at   | <i>ZRANB1</i>   | zinc finger, RAN-binding domain containing 1                                                | -0.670 | 8.7E-04          |
| 223296_at   | <i>SLC25A33</i> | solute carrier family 25 (pyrimidine nucleotide carrier), member 33                         | -0.671 | 8.7E-04          |
| 202641_at   | <i>ARL3</i>     | ADP-ribosylation factor-like 3                                                              | -0.672 | 8.7E-04          |
| 224653_at   | <i>EIF4EBP2</i> | eukaryotic translation initiation factor 4E binding protein 2                               | -0.673 | 8.7E-04          |
| 201752_s_at | <i>ADD3</i>     | adducin 3 (gamma)                                                                           | -0.674 | 8.6E-04          |
| 230624_at   | <i>SLC25A27</i> | solute carrier family 25, member 27                                                         | -0.676 | 8.2E-04          |
| 213463_s_at | <i>FAM149B1</i> | family with sequence similarity 149, member B1                                              | -0.676 | 8.2E-04          |
| 225663_at   | <i>ACBD5</i>    | acyl-CoA binding domain containing 5                                                        | -0.679 | 7.9E-04          |

| Probeset ID  | Gene symbol     | Gene description                                                           | $\rho$ | Adjusted P-value |
|--------------|-----------------|----------------------------------------------------------------------------|--------|------------------|
| 214496_x_at  | <i>KAT6B</i>    | K(lysine) acetyltransferase 6B                                             | -0.680 | 7.8E-04          |
| 225930_at    | <i>NKIRASI</i>  | NFKB inhibitor interacting Ras-like 1                                      | -0.681 | 7.6E-04          |
| 205882_x_at  | <i>ADD3</i>     | adducin 3 (gamma)                                                          | -0.685 | 6.4E-04          |
| 235224_s_at  | <i>CAND1</i>    | cullin-associated and neddylation-dissociated 1                            | -0.685 | 6.4E-04          |
| 212078_s_at  | <i>MLL</i>      | myeloid/lymphoid or mixed-lineage leukemia (trithorax homolog, Drosophila) | -0.685 | 6.4E-04          |
| 227334_at    | <i>USP54</i>    | ubiquitin specific peptidase 54                                            | -0.686 | 6.4E-04          |
| 203608_at    | <i>ALDH5A1</i>  | aldehyde dehydrogenase 5 family, member A1                                 | -0.688 | 6.4E-04          |
| 235164_at    | <i>ZNF25</i>    | zinc finger protein 25                                                     | -0.689 | 6.3E-04          |
| 227585_at    | <i>ATAD1</i>    | ATPase family, AAA domain containing 1                                     | -0.691 | 6.1E-04          |
| 212076_at    | <i>MLL</i>      | myeloid/lymphoid or mixed-lineage leukemia (trithorax homolog, Drosophila) | -0.691 | 6.1E-04          |
| 1568877_a_at | <i>ACBD5</i>    | acyl-CoA binding domain containing 5                                       | -0.692 | 6.1E-04          |
| 232905_at    | <i>GTF2H5</i>   | general transcription factor IIH, polypeptide 5                            | -0.693 | 6.1E-04          |
| 212452_x_at  | <i>KAT6B</i>    | K(lysine) acetyltransferase 6B                                             | -0.694 | 6.1E-04          |
| 218957_s_at  | <i>PAAF1</i>    | proteasomal ATPase-associated factor 1                                     | -0.698 | 5.3E-04          |
| 213268_at    | <i>CAMTA1</i>   | calmodulin binding transcription activator 1                               | -0.700 | 5.1E-04          |
| 201276_at    | <i>RAB5B</i>    | RAB5B, member RAS oncogene family                                          | -0.700 | 5.1E-04          |
| 226352_at    | <i>JMY</i>      | junction mediating and regulatory protein, p53 cofactor                    | -0.700 | 5.1E-04          |
| 216399_s_at  | <i>SCAPER</i>   | S-phase cyclin A-associated protein in the ER                              | -0.701 | 5.1E-04          |
| 207842_s_at  | <i>CASC3</i>    | cancer susceptibility candidate 3                                          | -0.704 | 5.1E-04          |
| 203431_s_at  | <i>ARHGAP32</i> | Rho GTPase activating protein 32                                           | -0.705 | 5.1E-04          |
| 209741_x_at  | <i>SCAPER</i>   | S-phase cyclin A-associated protein in the ER                              | -0.705 | 5.1E-04          |
| 1554784_at   | <i>CNTN1</i>    | contactin 1                                                                | -0.706 | 5.1E-04          |
| 1557073_s_at | <i>TTBK2</i>    | tau tubulin kinase 2                                                       | -0.709 | 5.1E-04          |
| 227321_at    | <i>GATS</i>     | GATS, stromal antigen 3 opposite strand                                    | -0.714 | 4.7E-04          |
| 219743_at    | <i>HEY2</i>     | hairy/enhancer-of-split related with YRPW motif 2                          | -0.727 | 3.8E-04          |
| 238115_at    | <i>DNAJC18</i>  | DnaJ (Hsp40) homolog, subfamily C, member 18                               | -0.729 | 3.8E-04          |
| 226186_at    | <i>TMOD2</i>    | tropomodulin 2 (neuronal)                                                  | -0.730 | 3.8E-04          |
| 203097_s_at  | <i>RAPGEF2</i>  | Rap guanine nucleotide exchange factor (GEF) 2                             | -0.743 | 3.8E-04          |

Note - Spearman's rank correlation test was used to measure the relationship between gene expression level and glioma grade. Some genes are encoded by multiple probe sets.

**Supplementary Table S2.** Ion channel genes that are differentially expressed with glioma grade in the UHC cohort

| Probeset ID  | Gene symbol    | Gene description                                                                          | $\rho$ | Adjusted <i>P</i> -value |
|--------------|----------------|-------------------------------------------------------------------------------------------|--------|--------------------------|
| 208659_at    | <i>CLIC1</i>   | chloride intracellular channel 1                                                          | 0.473  | 2.3E-02                  |
| 201560_at    | <i>CLIC4</i>   | chloride intracellular channel 4                                                          | 0.431  | 4.3E-02                  |
| 205903_s_at  | <i>KCNN3</i>   | potassium intermediate/small conductance calcium-activated channel, subfamily N, member 3 | -0.423 | 4.8E-02                  |
| 231103_at    | <i>KCNN3</i>   | potassium intermediate/small conductance calcium-activated channel, subfamily N, member 3 | -0.425 | 4.7E-02                  |
| 1555268_a_at | <i>GRID1</i>   | glutamate receptor, ionotropic, delta 1                                                   | -0.457 | 3.0E-02                  |
| 228414_at    | <i>KCNMA1</i>  | potassium large conductance calcium-activated channel, subfamily M, alpha member 1        | -0.463 | 2.7E-02                  |
| 1555246_a_at | <i>SCN1A</i>   | sodium channel, voltage-gated, type I, alpha subunit                                      | -0.470 | 2.5E-02                  |
| 210078_s_at  | <i>KCNAB1</i>  | potassium voltage-gated channel, shaker-related subfamily, beta member 1                  | -0.477 | 2.2E-02                  |
| 210108_at    | <i>CACNA1D</i> | calcium channel, voltage-dependent, L type, alpha 1D subunit                              | -0.480 | 2.2E-02                  |
| 1555993_at   | <i>CACNA1D</i> | calcium channel, voltage-dependent, L type, alpha 1D subunit                              | -0.483 | 2.1E-02                  |
| 236538_at    | <i>GRIA2</i>   | glutamate receptor, ionotropic, AMPA 2                                                    | -0.489 | 1.9E-02                  |
| 211006_s_at  | <i>KCNB1</i>   | potassium voltage-gated channel, Shab-related subfamily, member 1                         | -0.501 | 1.5E-02                  |
| 205358_at    | <i>GRIA2</i>   | glutamate receptor, ionotropic, AMPA 2                                                    | -0.511 | 1.3E-02                  |
| 244680_at    | <i>GLRB</i>    | glycine receptor, beta                                                                    | -0.511 | 1.3E-02                  |
| 207103_at    | <i>KCND2</i>   | potassium voltage-gated channel, Shal-related subfamily, member 2                         | -0.513 | 1.3E-02                  |
| 244623_at    | <i>KCNQ5</i>   | potassium voltage-gated channel, KQT-like subfamily, member 5                             | -0.514 | 1.2E-02                  |
| 211662_s_at  | <i>VDAC2</i>   | voltage-dependent anion channel 2                                                         | -0.525 | 1.0E-02                  |
| 207091_at    | <i>P2RX7</i>   | purinergic receptor P2X, ligand-gated ion channel, 7                                      | -0.536 | 8.1E-03                  |
| 210471_s_at  | <i>KCNAB1</i>  | potassium voltage-gated channel, shaker-related subfamily, beta member 1                  | -0.538 | 8.0E-03                  |
| 228581_at    | <i>KCNJ10</i>  | potassium inwardly-rectifying channel, subfamily J, member 10                             | -0.544 | 7.2E-03                  |
| 205279_s_at  | <i>GLRB</i>    | glycine receptor, beta                                                                    | -0.559 | 5.6E-03                  |
| 228608_at    | <i>NALCN</i>   | sodium leak channel, non-selective                                                        | -0.565 | 5.1E-03                  |
| 203950_s_at  | <i>CLCN6</i>   | chloride channel, voltage-sensitive 6                                                     | -0.604 | 2.5E-03                  |
| 205280_at    | <i>GLRB</i>    | glycine receptor, beta                                                                    | -0.632 | 1.6E-03                  |

Note - Spearman's rank correlation test was used to measure the relationship between gene expression level and glioma grade. Some genes are encoded by multiple probe sets.



**Supplementary Table S3.** Significant correlation between expression of the 18 ion channel genes and glioma grade in the HFH cohort

| Probeset ID  | Gene symbol    | Gene description                                                                          | $\rho$ | Adjusted P-value |
|--------------|----------------|-------------------------------------------------------------------------------------------|--------|------------------|
| 208659_at    | <i>CLIC1</i>   | chloride intracellular channel 1                                                          | 0.672  | 0.0E-00          |
| 201560_at    | <i>CLIC4</i>   | chloride intracellular channel 4                                                          | 0.555  | 1.6E-14          |
| 221881_s_at  | <i>CLIC4</i>   | chloride intracellular channel 4                                                          | 0.546  | 5.1E-14          |
| 201559_s_at  | <i>CLIC4</i>   | chloride intracellular channel 4                                                          | 0.536  | 1.6E-13          |
| 1555246_a_at | <i>SCN1A</i>   | sodium channel, voltage-gated, type I, alpha subunit                                      | -0.165 | 4.1E-02          |
| 205903_s_at  | <i>KCNN3</i>   | potassium intermediate/small conductance calcium-activated channel, subfamily N, member 3 | -0.166 | 4.0E-02          |
| 210383_at    | <i>SCN1A</i>   | sodium channel, voltage-gated, type I, alpha subunit                                      | -0.201 | 1.2E-02          |
| 231103_at    | <i>KCNN3</i>   | potassium intermediate/small conductance calcium-activated channel, subfamily N, member 3 | -0.294 | 1.6E-04          |
| 207091_at    | <i>P2RX7</i>   | purinergic receptor P2X, ligand-gated ion channel, 7                                      | -0.302 | 1.0E-04          |
| 207103_at    | <i>KCND2</i>   | potassium voltage-gated channel, Shal-related subfamily, member 2                         | -0.322 | 3.2E-05          |
| 211662_s_at  | <i>VDAC2</i>   | voltage-dependent anion channel 2                                                         | -0.443 | 3.2E-09          |
| 221584_s_at  | <i>KCNMA1</i>  | potassium large conductance calcium-activated channel, subfamily M, alpha member 1        | -0.447 | 2.2E-09          |
| 205279_s_at  | <i>GLRB</i>    | glycine receptor, beta                                                                    | -0.496 | 1.6E-11          |
| 228581_at    | <i>KCNJ10</i>  | potassium inwardly-rectifying channel, subfamily J, member 10                             | -0.521 | 9.8E-13          |
| 205280_at    | <i>GLRB</i>    | glycine receptor, beta                                                                    | -0.525 | 6.4E-13          |
| 210108_at    | <i>CACNA1D</i> | calcium channel, voltage-dependent, L type, alpha 1D subunit                              | -0.543 | 7.0E-14          |
| 244623_at    | <i>KCNQ5</i>   | potassium voltage-gated channel, KQT-like subfamily, member 5                             | -0.556 | 1.3E-14          |
| 228414_at    | <i>KCNMA1</i>  | potassium large conductance calcium-activated channel, subfamily M, alpha member 1        | -0.571 | 1.7E-15          |
| 244680_at    | <i>GLRB</i>    | glycine receptor, beta                                                                    | -0.586 | 2.2E-16          |
| 203950_s_at  | <i>CLCN6</i>   | chloride channel, voltage-sensitive 6                                                     | -0.586 | 2.2E-16          |
| 211006_s_at  | <i>KCNB1</i>   | potassium voltage-gated channel, Shab-related subfamily, member 1                         | -0.591 | 9.2E-17          |
| 210471_s_at  | <i>KCNAB1</i>  | potassium voltage-gated channel, shaker-related subfamily, beta member 1                  | -0.601 | 2.0E-17          |
| 205358_at    | <i>GRIA2</i>   | glutamate receptor, ionotropic, AMPA 2                                                    | -0.605 | 1.0E-17          |
| 210078_s_at  | <i>KCNAB1</i>  | potassium voltage-gated channel, shaker-related subfamily, beta member 1                  | -0.608 | 6.5E-18          |
| 236538_at    | <i>GRIA2</i>   | glutamate receptor, ionotropic, AMPA 2                                                    | -0.630 | 1.5E-19          |
| 1555268_a_at | <i>GRID1</i>   | glutamate receptor, ionotropic, delta 1                                                   | -0.656 | 1.3E-21          |
| 1555993_at   | <i>CACNA1D</i> | calcium channel, voltage-dependent, L type, alpha 1D subunit                              | -0.665 | 2.2E-22          |
| 228608_at    | <i>NALCN</i>   | sodium leak channel, non-selective                                                        | -0.687 | 2.0E-24          |

Note - Spearman's rank correlation test was used to measure the relationship between gene expression level and glioma grade. Some genes are encoded by multiple probe sets.
